# Supplementary material
Source: PubMed Central journal article supplement (PMC8756544)
Supplement: mmc1.pdf [file mmc1.pdf]

**HGGA, Volume 3**

**Supplemental information**

**Transethnic analysis of psoriasis susceptibility  
in South Asians and Europeans enhances  
fine mapping in the MHC and genome wide**

**Philip E. Stuart, Lam C. Tsoi, Rajan P. Nair, Manju Ghosh, Madhulika Kabra, Pakeeza A. Shaiq, Ghazala K. Raja, Raheel Qamar, B.K. Thelma, Matthew T. Patrick, Anita Parihar, Sonam Singh, Sujay Khandpur, Uma Kumar, Michael Wittig, Frauke Degenhardt, Trilokraj Tejasvi, John J. Voorhees, Stephan Weidinger, Andre Franke, Goncalo R. Abecasis, Vinod K. Sharma, and James T. Elder**

## Table of Contents

Figure S1. Principal component analysis of the European and South Asian cohorts of this study.

Figure S2. QQ-plots for the three genome-wide meta-analyses of psoriasis associations.

Figure S3. Manhattan plots of psoriasis associations.

Figure S4. Forest plots for two newly established psoriasis risk loci.

Figure S5. Comparing accuracy of HLA alleles imputed for a set of 397 South Asians when using a SNP2HLA reference panel of the same 397 South Asians vs. increasingly large random subsets of the European-ancestry T1DGC reference panel.

Figure S6. Boxplots comparing sample imputation accuracy of 2-field protein alleles for five HLA genes as a function of 19 different SNP2HLA reference panels for a validation set of 397 people of South Asian ancestry.

Figure S7. Boxplots comparing allelic imputation accuracy of 2-field protein alleles for five HLA genes as a function of 19 different SNP2HLA reference panels for a validation set of 397 people of South Asian ancestry.

Figure S8. Boxplots comparing sample imputation accuracy of 2-field protein alleles for two HLA genes as a function of 11 different SNP2HLA reference panels for a validation set of 397 people of South Asian ancestry.

Figure S9. Boxplots comparing allelic imputation accuracy of 2-field protein alleles for two HLA genes as a function of 11 different SNP2HLA reference panels for a validation set of 397 people of South Asian ancestry.

Figure S10. Boxplots comparing sample imputation accuracy of 2-field protein alleles for *HLA-DQA1* as a function of 11 different SNP2HLA reference panels for a validation set of 397 people of South Asian ancestry.

Figure S11. Boxplots comparing allelic imputation accuracy of 2-field protein alleles for *HLA-DQA1* as a function of 11 different SNP2HLA reference panels for a validation set of 397 people of South Asian ancestry.

Figure S12. Boxplots comparing sample imputation accuracy of 2-field protein alleles for five HLA genes as a function of 20 different SNP2HLA reference panels for four validation sets of people of European ancestry.

Figure S13. Boxplots comparing allelic imputation accuracy of 2-field protein alleles for five HLA genes as a function of 20 different SNP2HLA reference panels for four validation sets of people of European ancestry.

Figure S14. Boxplots comparing sample imputation accuracy of 2-field protein alleles for *HLA-DQA1* as a function of seven different SNP2HLA reference panels for four validation sets of people of European ancestry.

Figure S15. Boxplots comparing allelic imputation accuracy of 2-field protein alleles for *HLA-DQA1* as a function of seven different SNP2HLA reference panels for four validation sets of people of European ancestry.

**Figure S16. Comparison of HLA imputation accuracies achieved with the best-performing reference panels of this study vs. those obtained using a recently published multi-ancestry panel.**

**Figure S17. Imputed 1-field *HLA-A*, *HLA-B*, *HLA-C* and *HLA-DPA1* allele frequencies for the European (EUR) and South Asian (SAS) datasets of this study.**

**Figure S18. Imputed 1-field *HLA-DPB1*, *HLA-DQA1*, *HLA-DQB1* and *HLA-DRB1* allele frequencies for the European (EUR) and South Asian (SAS) datasets of this study.**

**Figure S19. Imputed 2-field *HLA-A*, *HLA-B*, *HLA-C* and *HLA-DPA1* allele frequencies for the European (EUR) and South Asian (SAS) datasets of this study.**

**Figure S20. Imputed 2-field *HLA-DPB1*, *HLA-DQA1*, *HLA-DQB1* and *HLA-DRB1* allele frequencies for the European (EUR) and South Asian (SAS) datasets of this study.**

**Figure S21. Comparison of imputed class I HLA frequencies for this study with genotyped HLA frequencies for corresponding populations in the National Marrow Donor Program (NMDP) database.**

**Figure S22. Comparison of imputed class II HLA frequencies for this study with genotyped HLA frequencies for corresponding populations in the National Marrow Donor Program (NMDP) database.**

**Figure S23. Plots of rounds 1–4 of stepwise analysis of psoriasis association in the extended MHC region in people of South Asian ancestry.**

**Figure S24. Plots of rounds 5–6 of stepwise analysis of psoriasis association in the extended MHC region in people of South Asian ancestry.**

**Figure S25. Matrix of pairwise linkage disequilibrium among variants of the South Asian association model for the MHC region.**

**Figure S26. Plots of rounds 1–4 of stepwise analysis of psoriasis association in the extended MHC region in people of European ancestry.**

**Figure S27. Plots of rounds 5–8 of stepwise analysis of psoriasis association in the extended MHC region in people of European ancestry.**

**Figure S28. Plots of rounds 9–12 of stepwise analysis of psoriasis association in the extended MHC region in people of European ancestry.**

**Figure S29. Plots of rounds 13–16 of stepwise analysis of psoriasis association in the extended MHC region in people of European ancestry.**

**Figure S30. Pairwise linkage disequilibrium among variants of the European association model for the MHC region.**

**Figure S31. Plots of rounds 1–4 of stepwise analysis of psoriasis association in the extended MHC region in people of South Asian or European ancestry.**

**Figure S32. Plots of rounds 5–8 of stepwise analysis of psoriasis association in the extended MHC region in people of South Asian or European ancestry.**

**Figure S33. Plots of rounds 9–12 of stepwise analysis of psoriasis association in the extended MHC region in people of South Asian or European ancestry.**

**Figure S34. Plots of rounds 13–16 of stepwise analysis of psoriasis association in the extended MHC region in people of South Asian or European ancestry.**

**Figure S35. Plots of rounds 17–19 of stepwise analysis of psoriasis association in the extended MHC region in people of South Asian or European ancestry.**

**Figure S36. Pairwise linkage disequilibrium among variants of the transethnic association model for the MHC region.**

**Figure S37. Pairwise linkage disequilibrium between variants of the South Asian and European association models for the MHC region.**

**Figure S38. Plots comparing association effect sizes in South Asians vs. Europeans for all variants in the European regression model for the MHC region.**

**Figure S39. Pairwise linkage disequilibrium between variants of the South Asian and transethnic association models for the MHC region.**

**Figure S40. Pairwise linkage disequilibrium between variants of the European and transethnic association models for the MHC region.**

**Figure S41. Comparisons between the number of population-specific LD proxies, significance of association, and size of credible interval sets for the psoriasis risk loci.**

**Figure S42. Scatterplots comparing strength of linkage disequilibrium between South Asians and Europeans for all MHC variants selected by stepwise association analysis for South Asians, Europeans, or South Asians and Europeans combined.**

**Figure S43. Scatterplots of the relationship of significance of MHC association with variant imputation quality.**

**Table S1. Characteristics of the 10 studies analyzed for psoriasis associations.**

**Table S2. Validation sets used to assess accuracy of imputation for European ancestry individuals.**

**Table S3. Control of population stratification for 10 studies analyzed for psoriasis associations in the MHC region.**

**Table S4. Heterogeneity of  $\log(\text{OR})$  effect sizes across studies in each meta-analysis.**

**Table S5. Credible interval analysis for all established non-MHC loci in the EUR and transethnic meta-analyses.**

**Table S6. The independent signals identified in the meta-analysis.**

**Table S7. Accuracy of 1-field and 2-field HLA alleles imputed by a SNP2HLA reference panel of 397 individuals of South Asian ancestry.**

**Table S8. Data sources for SNP2HLA reference panels constructed and tested by this study.**

**Table S9. Composition of 19 SNP2HLA reference panels constructed and tested for imputation of MHC variants in South Asians.**

**Table S10. Accuracy of 2-field HLA protein alleles imputed by the best-performing SNP2HLA panels for individuals of South Asian ancestry.**

**Table S11. Accuracy of HLA alleles imputed by the best-performing SAS panel for populations in the phase 3 1000 Genomes dataset.**

**Table S12. Composition of 20 SNP2HLA reference panels constructed and tested for imputation of MHC variants in Europeans.**

**Table S13. Accuracy of 2-field HLA protein alleles imputed by the best-performing SNP2HLA panels for individuals of European ancestry.**

**Table S14. Counts and densities of coding, non-coding and immune-related genes in the extended MHC region.**

**Table S15. Frequency distribution of variants in the imputed genotype datasets for the MHC region, cross-classified by reference panel source, MHC region and ancestry.**

**Table S16. Frequency distribution of variants in the imputed genotype datasets for the MHC region, cross-classified by minor allele frequency, imputation quality, MHC region and ancestry.**

**Table S17. Frequency distribution of variants in the imputed genotype datasets for the MHC region, cross-classified by variant type, MHC region and ancestry.**

**Table S18. Proportion of MHC reference panel variants analyzed for association with psoriasis, cross-classified by minor allele frequency, MHC region and ancestry.**

**Table S19. Frequency distribution of imputed MHC variants analyzed for association with psoriasis, cross-classified by reference panel source, MHC region and ancestry.**

**Table S20. Frequency distribution of imputed MHC variants analyzed for association with psoriasis, cross-classified by minor allele frequency, imputation quality, MHC region and ancestry.**

**Table S21. Frequency distribution of imputed MHC variants analyzed for association with psoriasis, cross-classified by variant type, MHC region and ethnic population.**

**Table S22. Annotations and protein-changing surrogates for associated variants in the extended MHC region for people of South Asian ancestry.**

**Table S23. Parameters of 95% Bayesian credible sets for the five MHC psoriasis association signals in the final full regression model for people of South Asian ancestry.**

**Table S24. Psoriasis associations from stepwise analysis of the extended MHC region for eight studies of European ancestry.**

**Table S25. Annotations and protein-changing surrogates for associated variants in the extended MHC region for people of European ancestry.**

**Table S26. Parameters of 95% Bayesian credible sets for the 14 MHC psoriasis association signals in the final full regression model for people of European ancestry.**

**Table S27. Psoriasis associations from stepwise analysis of the extended MHC region for ten studies of South Asian or European ancestry.**

**Table S28. Annotations and protein-changing surrogates for associated variants in the extended MHC region for people of South Asian or European ancestry.**

**Table S29. Parameters of 95% Bayesian credible sets for the 17 MHC psoriasis association signals in the final full regression model for people of South Asian or European ancestry.**

**Table S30. Enrichment of variant types in full MHC regression models compared to the set of analyzed MHC variants.**

**Table S31. Enrichment of variant types in the MHC region compared to the whole genome.**

**Table S32. Complete results for stepwise conditional analysis of South Asian, European and transethnic psoriasis associations in the extended MHC region.**

**Table S33. Comparison of total and decomposed goodness of fit of within-population vs. cross-population association models for the MHC region.**

**Table S34. Mean imputation quality of variants in the imputed genotype datasets for the classical MHC region, cross-classified by minor allele frequency, ancestry, and reference panel.**

**Table S35. Comparison of 95% Bayesian credible sets for four MHC association signals occurring in both the transethnic association model and in at least one of the two monoethnic association models.**

**Table S36. Comparison of total and decomposed goodness of fit of transethnic vs. monoethnic association models for the MHC region.**

**Table S37. Most significant cis-eQTL effects in relevant tissues for noncoding psoriasis-associated MHC variants with a Bayesian posterior probability > 0.50.**

**Table S38. Functional annotation of noncoding psoriasis-associated MHC variants with a Bayesian posterior probability exceeding 0.50.**

## **Supplemental methods**

**Additional methods for construction of SNP2HLA reference panels**

**Additional methods for validation of SNP2HLA reference panels**

**Additional methods for association analysis of MHC variants**

**Selection and processing of imputed multiallelic variants**

**Principal components analysis of South Asians**

**Phenotypic variance explained**

**MHC variant annotation**

**Enrichment analysis**

## **Supplemental web resources**

## **Supplemental references**

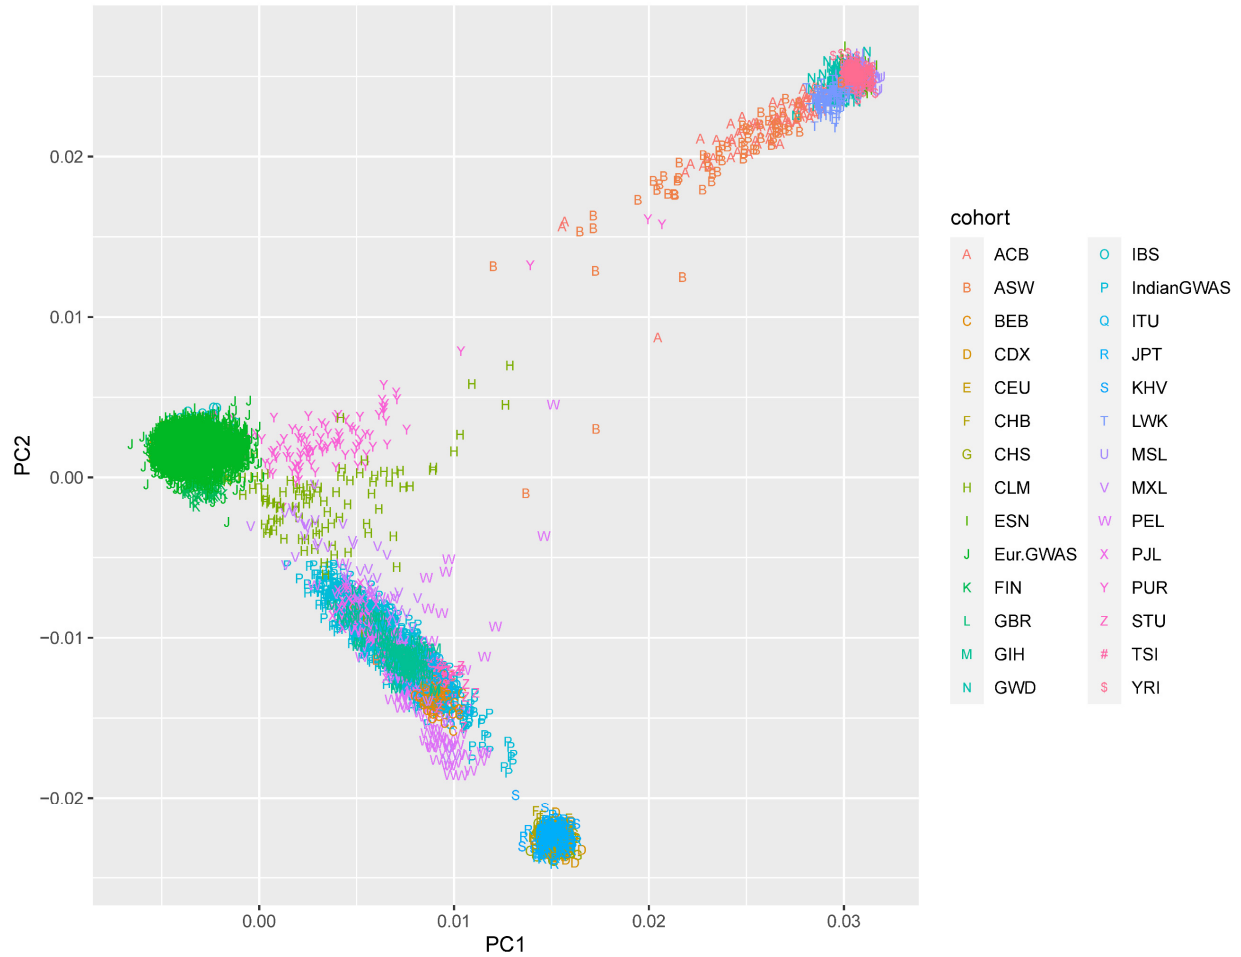

**Figure S1. Principal component analysis of the European and South Asian cohorts of this study.** Plot of the first two axes of a principal component analysis of the 44,161 individuals of European ancestry (denoted with a green J) and 4,310 individuals of South Asian ancestry (denoted with a cyan P) analyzed by this study. The EUR and SAS individuals of this study were analyzed with the 26 global populations of phase 3 of the 1000 Genomes Project. Only those EUR and SAS individuals passing all quality control filters, including removal of population outliers detected with PCA, are plotted here.

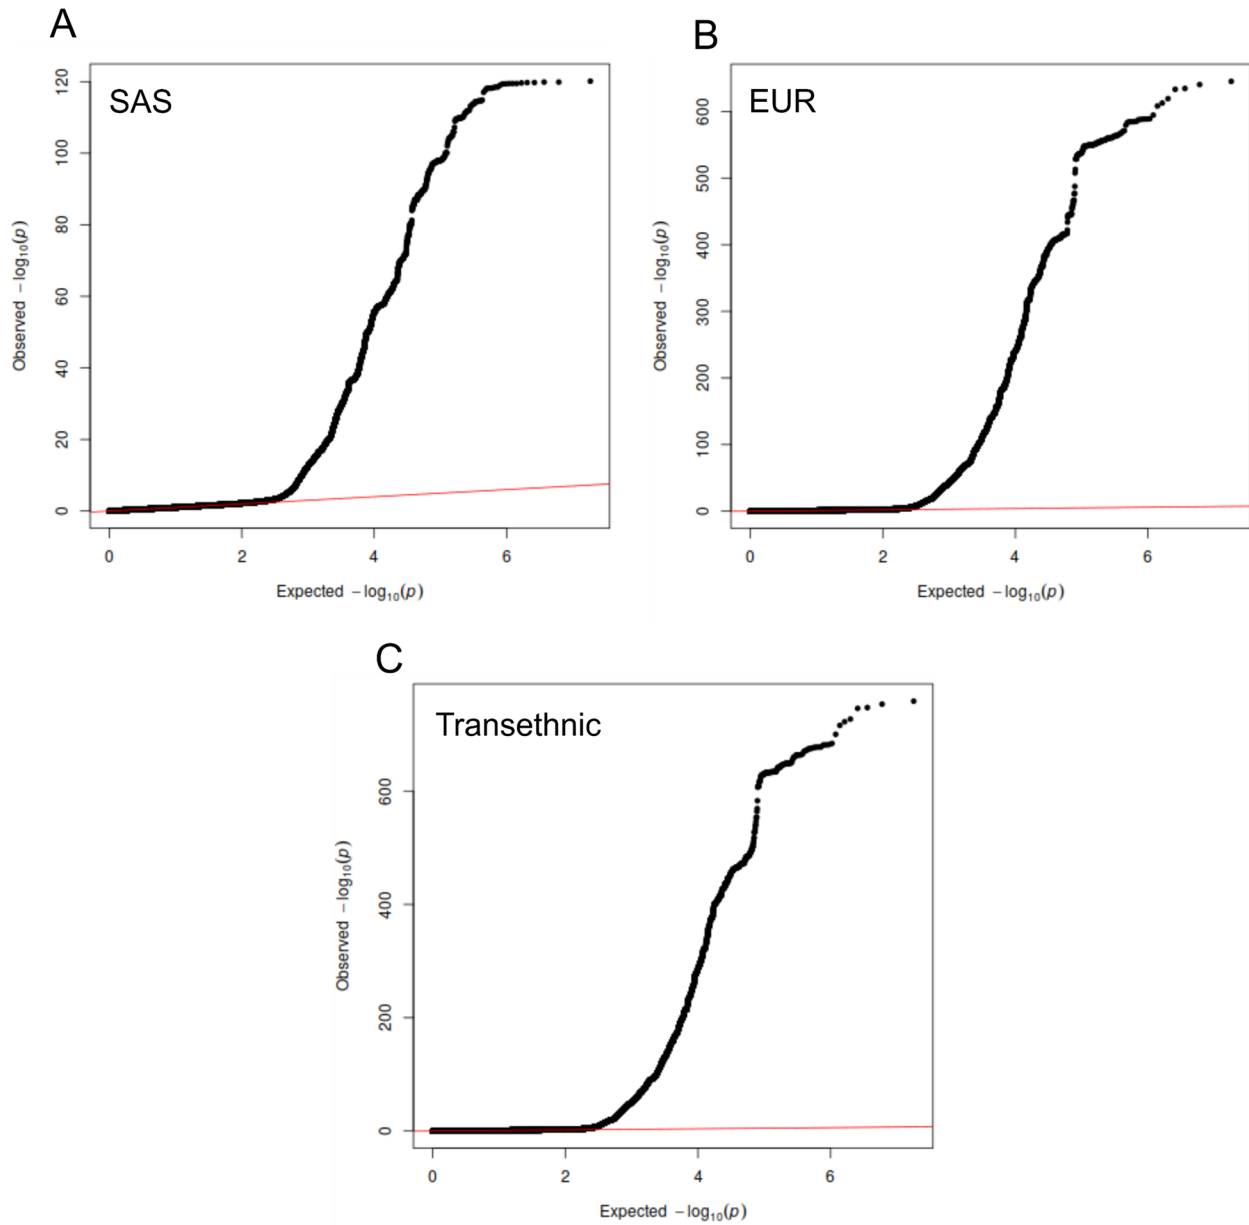

**Figure S2. QQ-plots for the three genome-wide meta-analyses of psoriasis associations.** Quantile-quantile plots of observed vs. expected  $-\log_{10}$  of association p-values are plotted for the South Asian (SAS), European (EUR) and transethnic (SAS+EUR) meta-analyses in panels A, B and C, respectively.



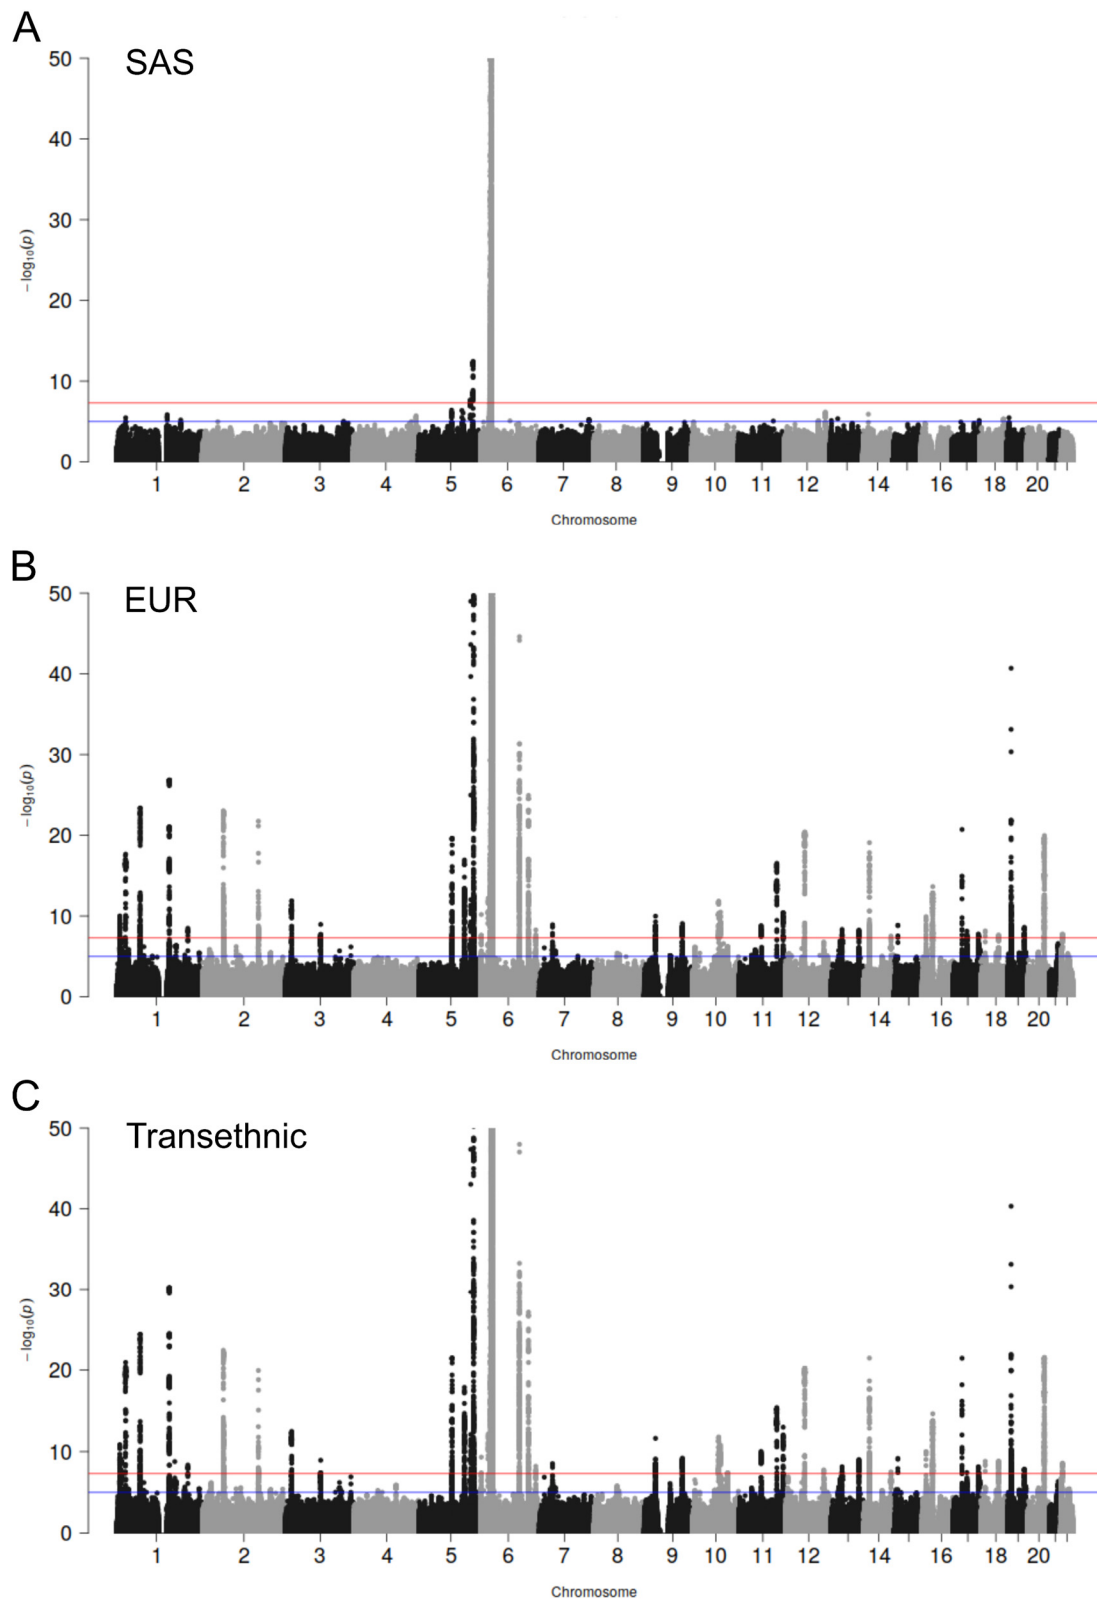

**Figure S3. Manhattan plots of psoriasis associations.** Negative  $\log_{10}$  of association p-values are plotted against chromosomal position for meta-analyses of two South Asian cohorts (panel A), eight European ancestry cohorts (panel B), and a transethnic analysis of all ten cohorts (panel C). For better visualization of less significant peaks, the y-axis of all three panels is truncated at  $-\log_{10}(p)$  of 50.

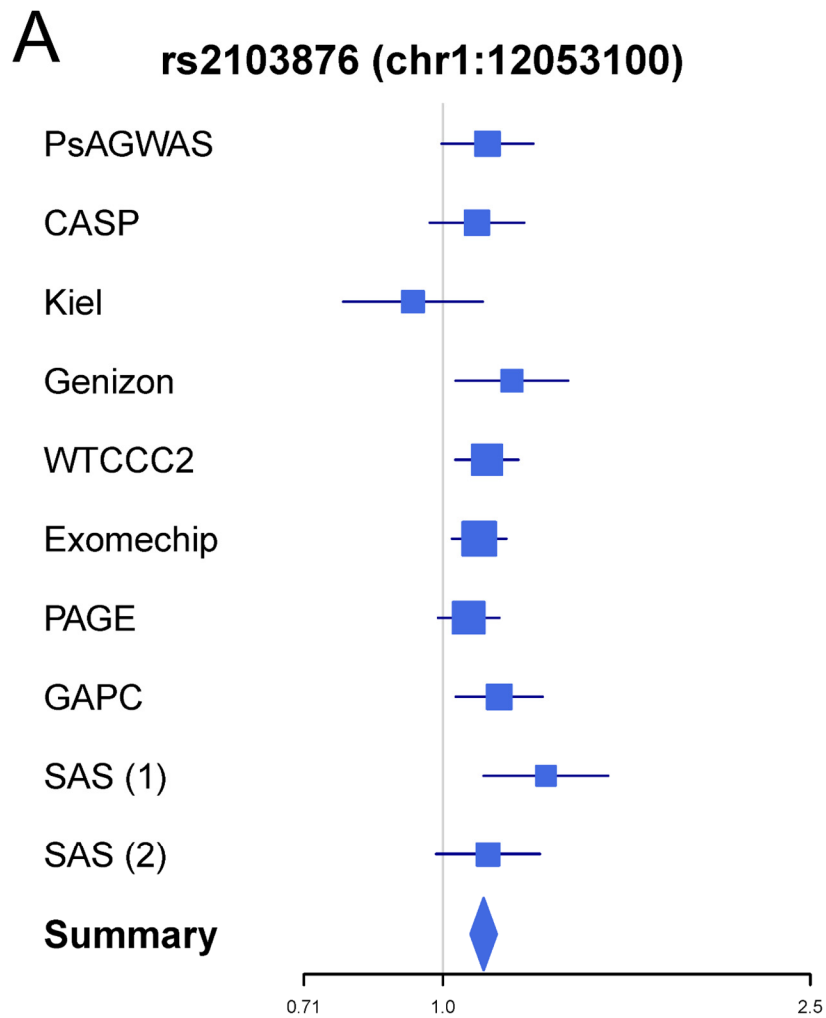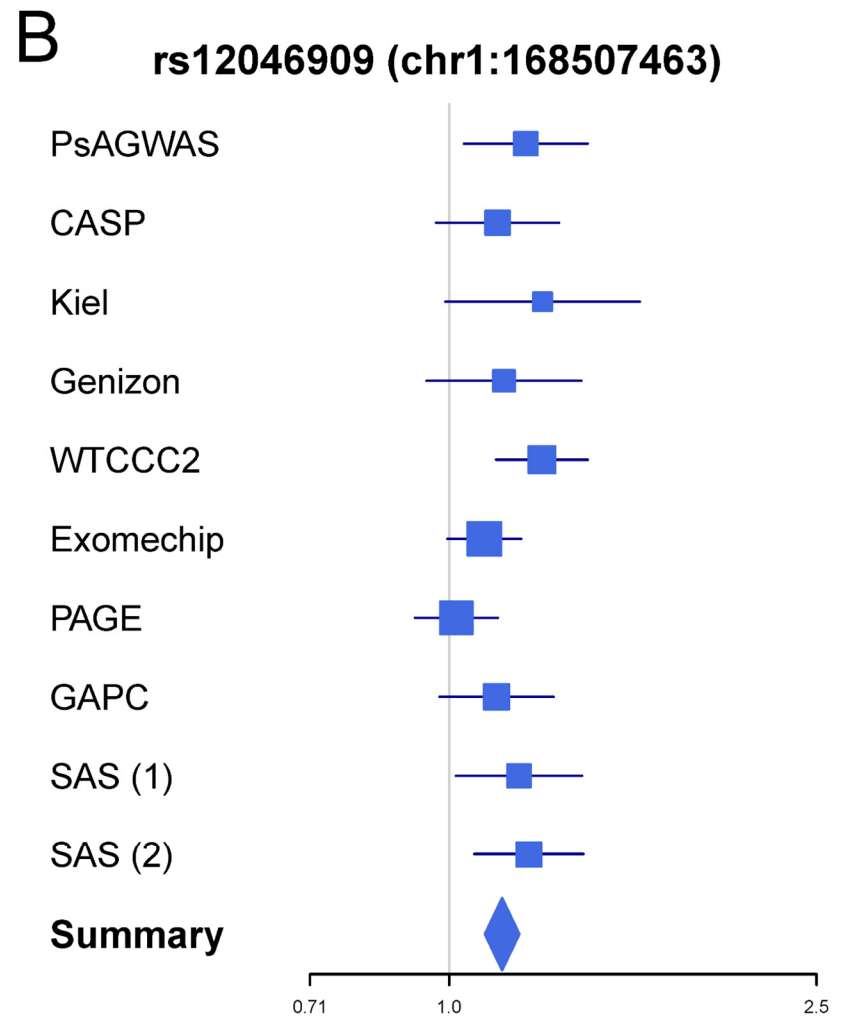

**Figure S4. Forest plots for two newly established psoriasis risk loci.** Odds ratios and their 95% confidence intervals are plotted for the association of psoriasis with two psoriasis risk variants (rs2103876 in panel A and rs12046909 in panel B) newly established by the transethnic meta-analysis. Results for the eight European ancestry cohorts are shown in the first 8 rows, for the two South Asian (SAS) cohorts in the next two rows, and the overall meta-analysis result is shown at the bottom.

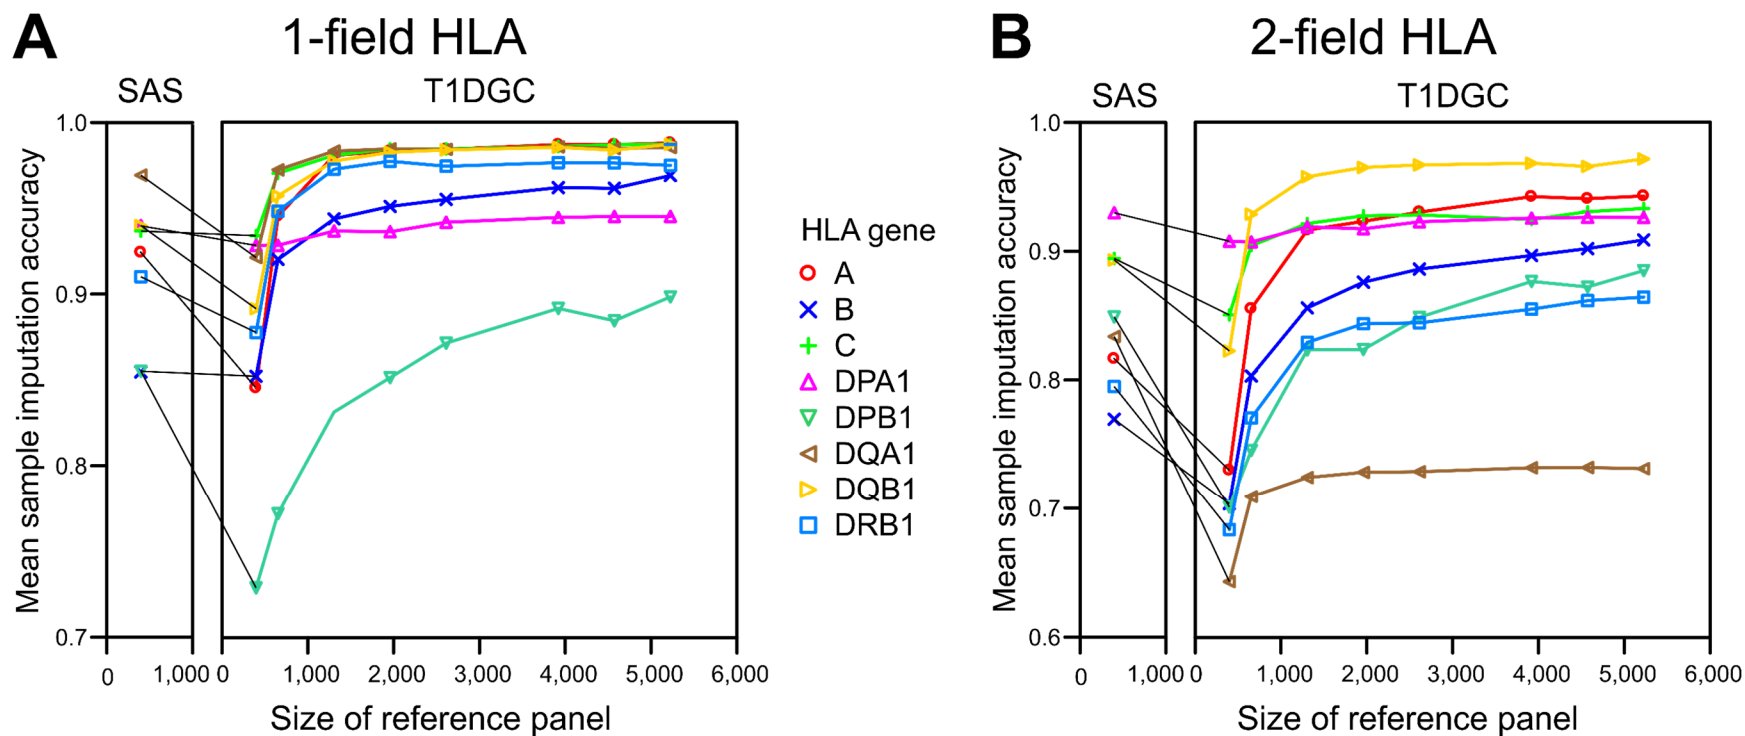

**Figure S5. Comparing accuracy of HLA alleles imputed for a set of 397 South Asians when using a SNP2HLA reference panel of the same 397 South Asians vs. increasingly large random subsets of the European-ancestry T1DGC reference panel.** Results are shown for 1-field (panel A) and 2-field (panel B) alleles of eight HLA genes. The left and right parts of each panel show accuracies when using the South Asian (SAS) and T1DGC SNP2HLA panels, respectively. Leave-one-out cross-validation was used to estimate imputation accuracies for the South Asian panel. For the T1DGC panel, eight randomly sampled subsets were assessed, with sample sizes of 397, 653, 1306, 1959, 2613, 3919, 4572 and 5225, representing 7.6%, 12.5%, 25%, 37.5%, 50%, 75%, 87.5% and 100% of the full T1DGC panel, respectively. In each panel, lines connect accuracies based on South Asian and European reference panels of equal sizes ( $n=397$ ).

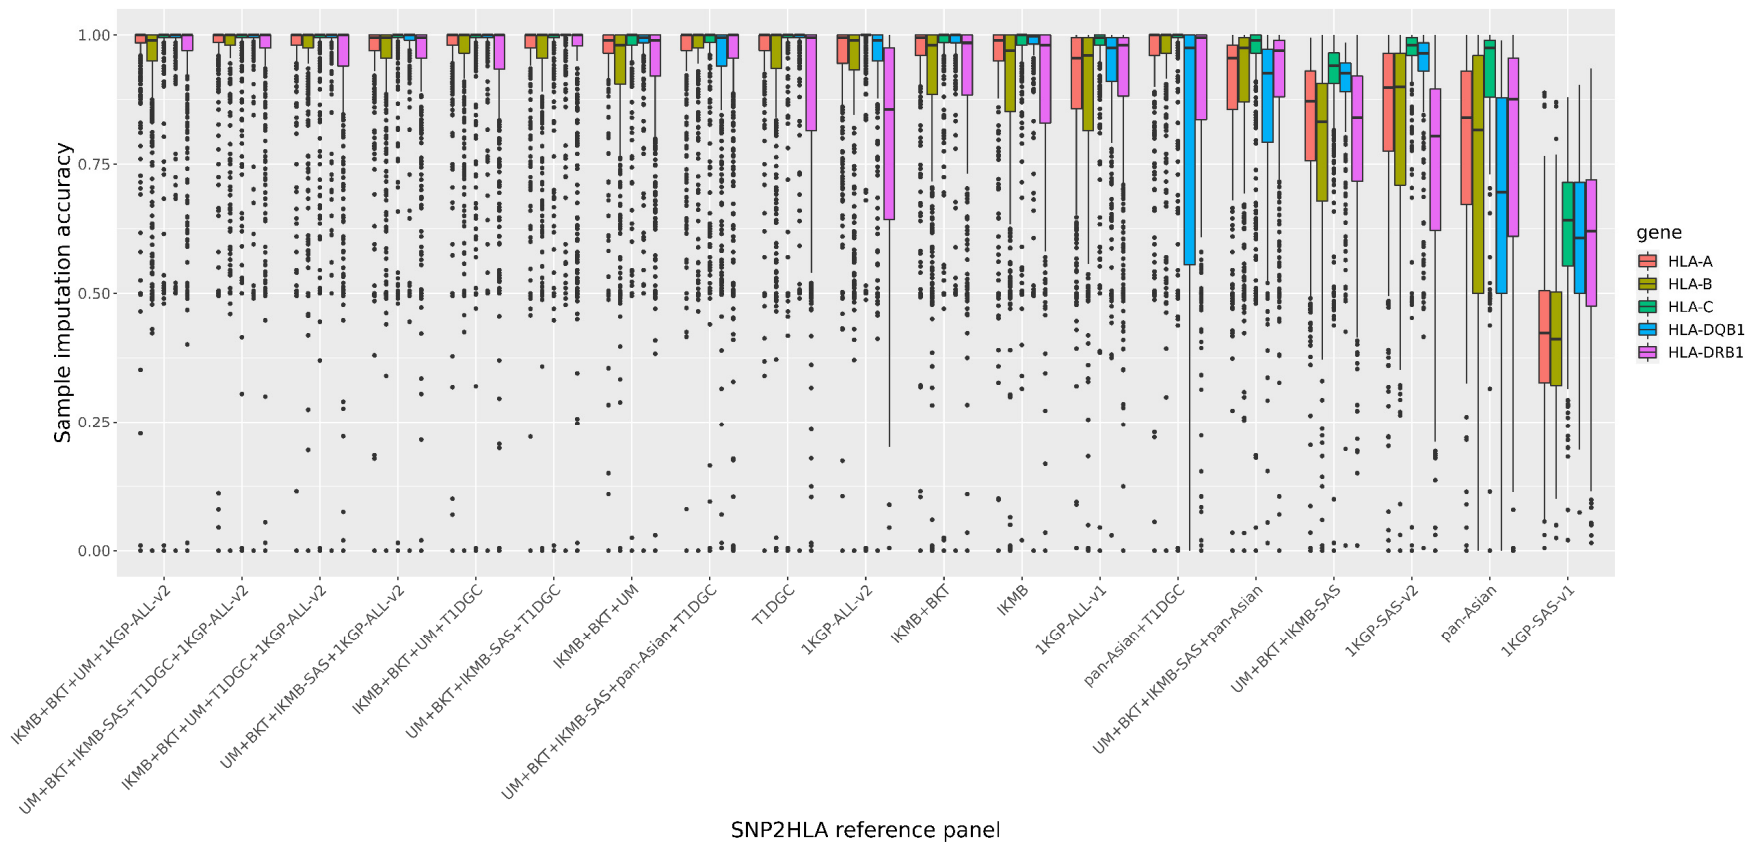

**Figure S6. Boxplots comparing sample imputation accuracy of 2-field protein alleles for five HLA genes as a function of 19 different SNP2HLA reference panels for a validation set of 397 people of South Asian ancestry.** Panels are listed in decreasing order of their mean rank across 12 performance metrics based on the Wilcoxon signed rank test and the paired t-test. Sample imputation accuracy for a given HLA gene is measured for each individual in the validation set by subtracting, from 1, one-half of the sum for that individual of the positive differences in genotyped vs. imputed dosages of all 2-field alleles of that gene in the reference panel.

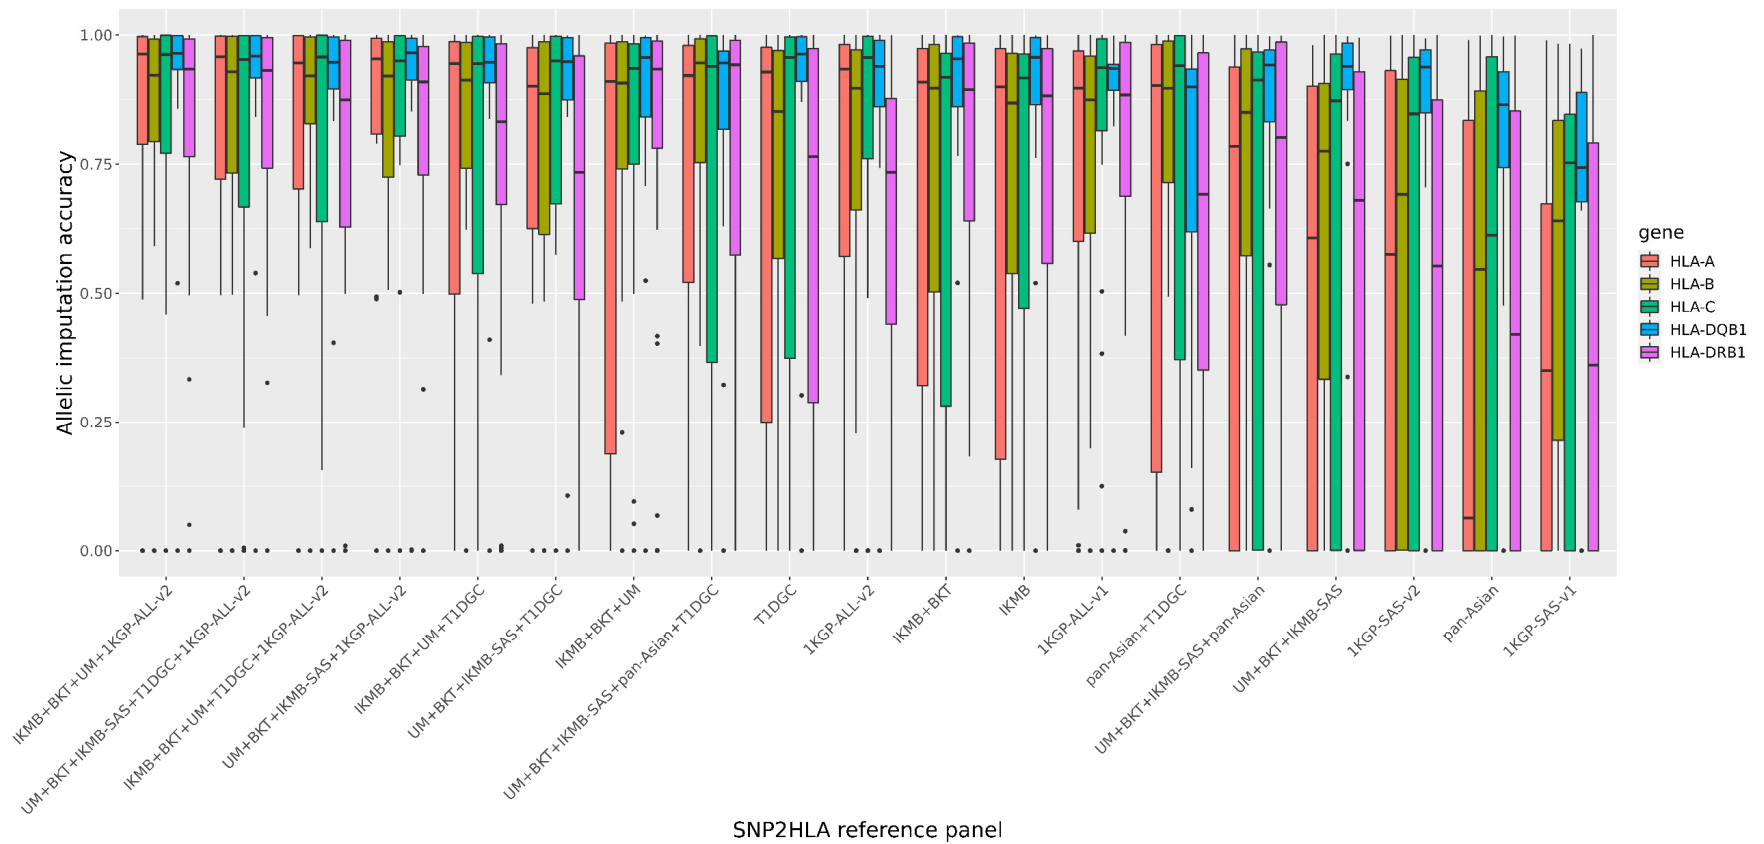

**Figure S7. Boxplots comparing allelic imputation accuracy of 2-field protein alleles for five HLA genes as a function of 19 different SNP2HLA reference panels for a validation set of 397 people of South Asian ancestry.** Panels are listed in decreasing order of their mean rank across 12 performance metrics based on the Wilcoxon signed rank test and the paired t-test. Allelic imputation accuracy for a given HLA gene is measured for each 2-field allele of that gene in the reference panel by computing the squared Pearson correlation of vectors of genotyped and imputed dosages of that allele for all individuals in the validation set.

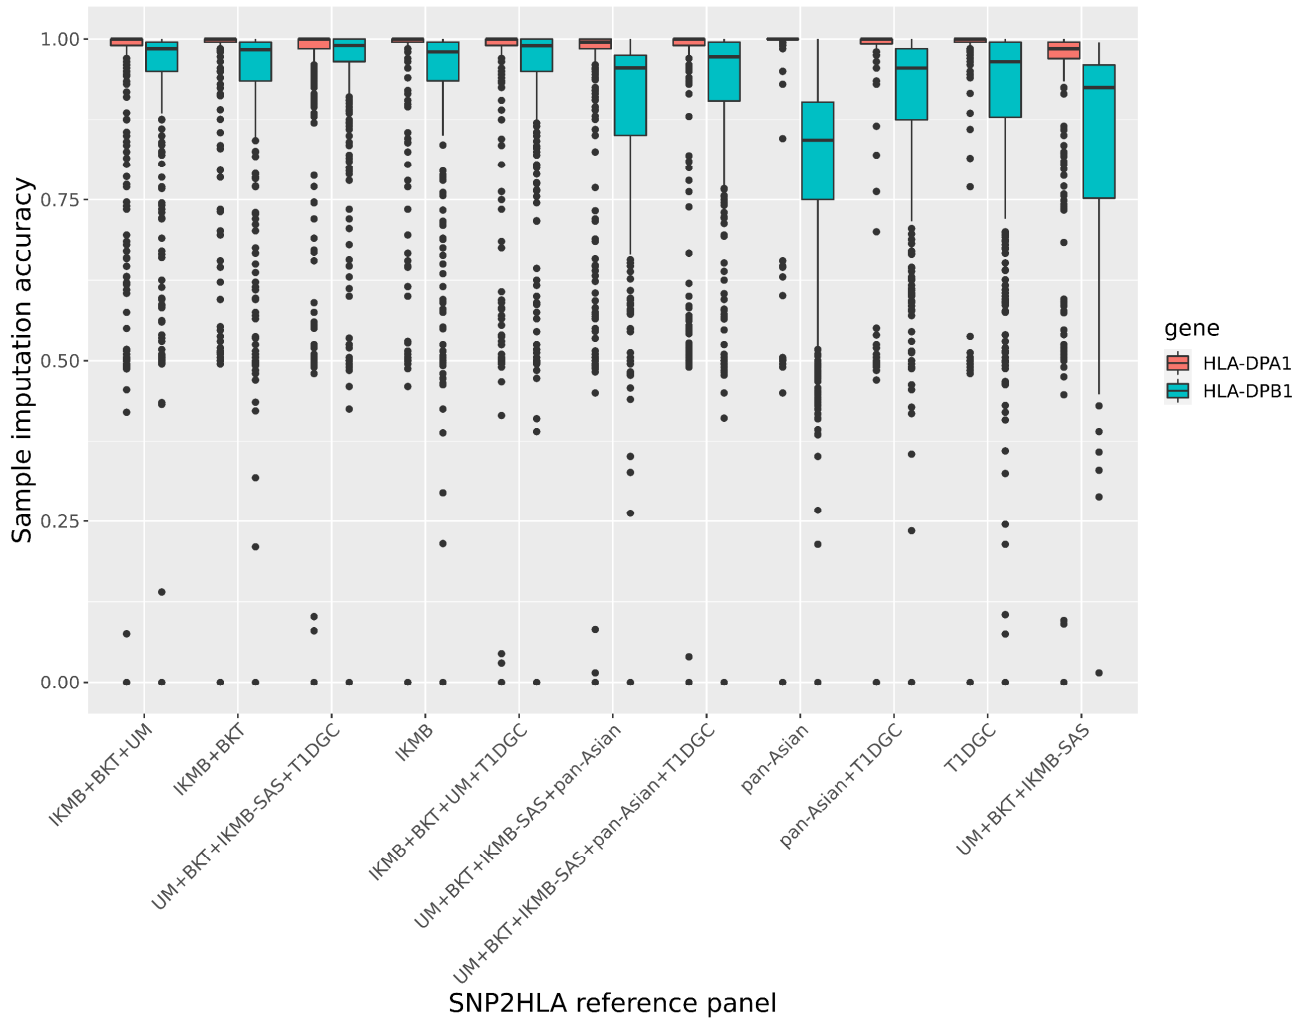

**Figure S8. Boxplots comparing sample imputation accuracy of 2-field protein alleles for two HLA genes as a function of 11 different SNP2HLA reference panels for a validation set of 397 people of South Asian ancestry.** Panels are listed in decreasing order of their mean rank across 12 performance metrics based on the Wilcoxon signed rank test and the paired t-test. Sample imputation accuracy for a given HLA gene is measured for each individual in the validation set by subtracting, from 1, one-half of the sum for that individual of the positive differences in genotyped vs. imputed dosages of all 2-field alleles of that gene in the reference panel.

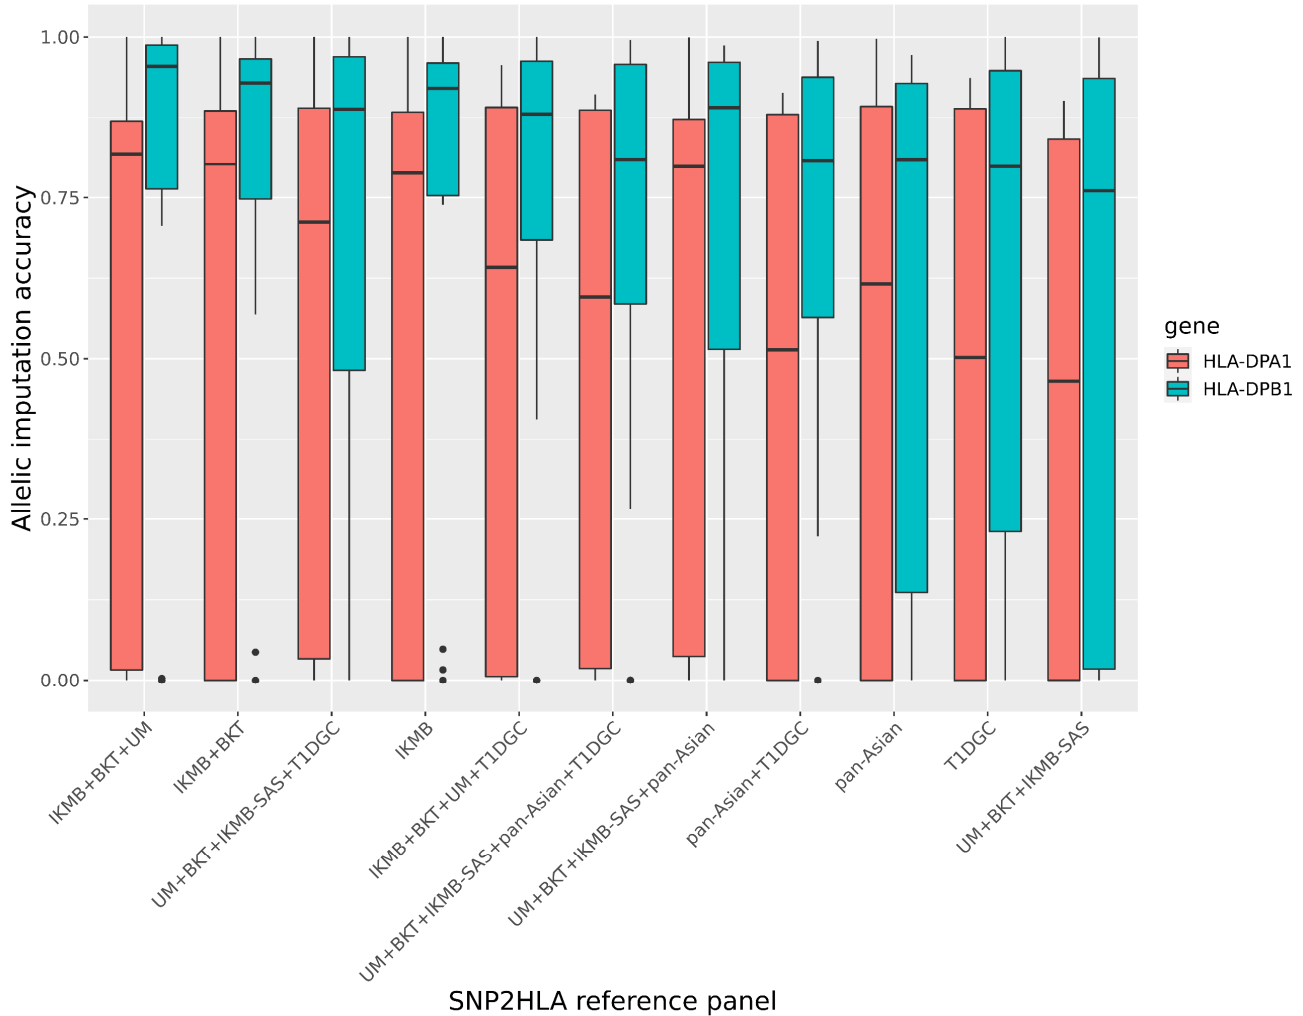

**Figure S9. Boxplots comparing allelic imputation accuracy of 2-field protein alleles for two HLA genes as a function of 11 different SNP2HLA reference panels for a validation set of 397 people of South Asian ancestry.** Panels are listed in decreasing order of their mean rank across 12 performance metrics based on the Wilcoxon signed rank test and the paired t-test. Allelic imputation accuracy for a given HLA gene is measured for each 2-field allele of that gene in the reference panel by computing the squared Pearson correlation of vectors of genotyped and imputed dosages of that allele for all individuals in the validation set.

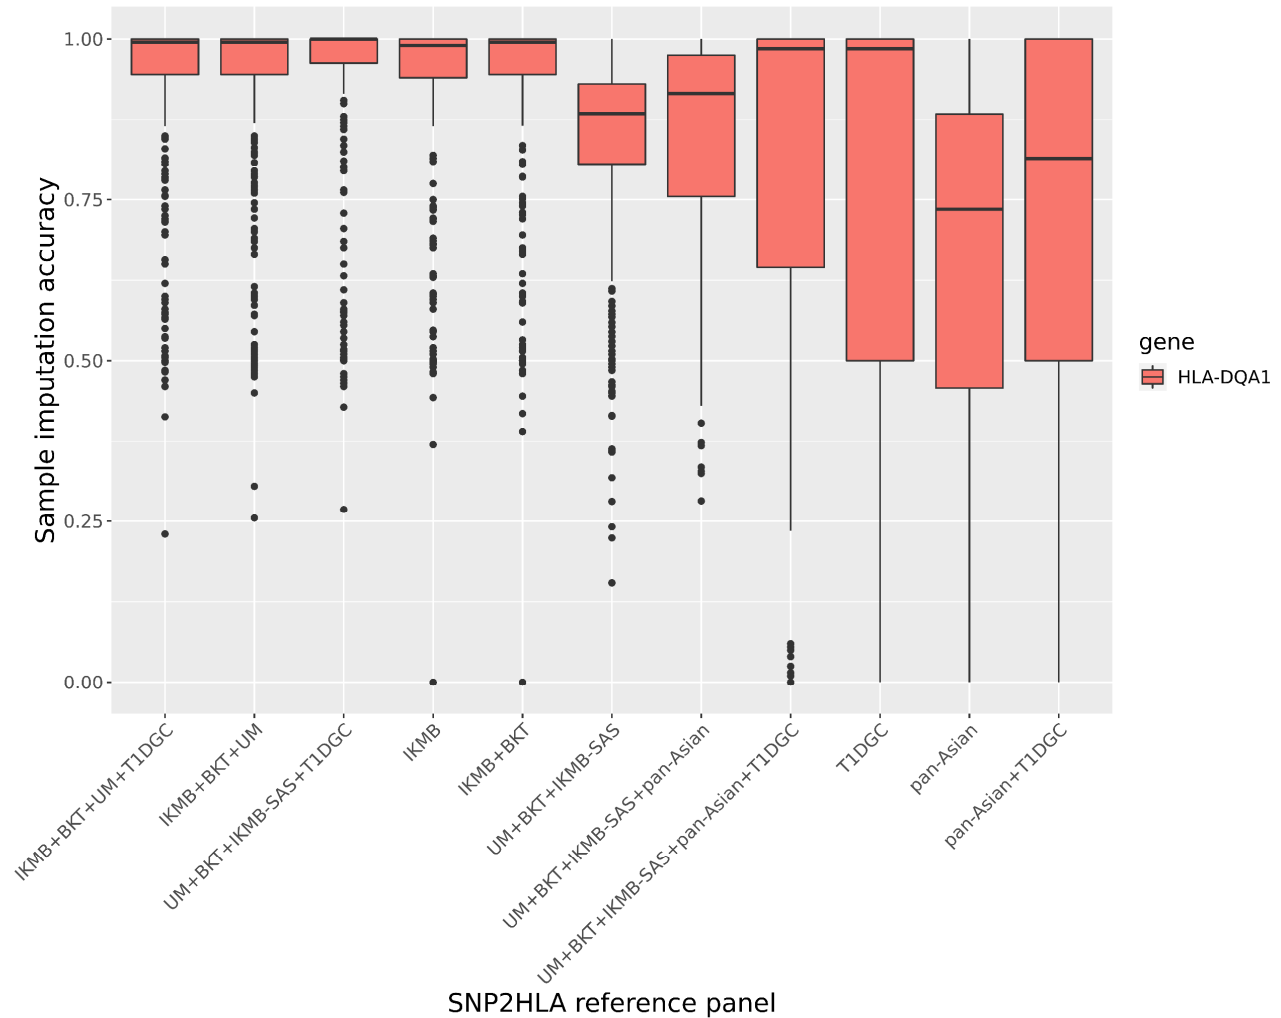

**Figure S10. Boxplots comparing sample imputation accuracy of 2-field protein alleles for *HLA-DQA1* as a function of 11 different SNP2HLA reference panels for a validation set of 397 people of South Asian ancestry.** Panels are listed in decreasing order of their mean rank across 12 performance metrics based on the Wilcoxon signed rank test and the paired t-test. Sample imputation accuracy is measured for each individual in the validation set by subtracting, from 1, one-half of the sum for that individual of the positive differences in genotyped vs. imputed dosages of all 2-field alleles of *HLA-DQA1* in the reference panel.



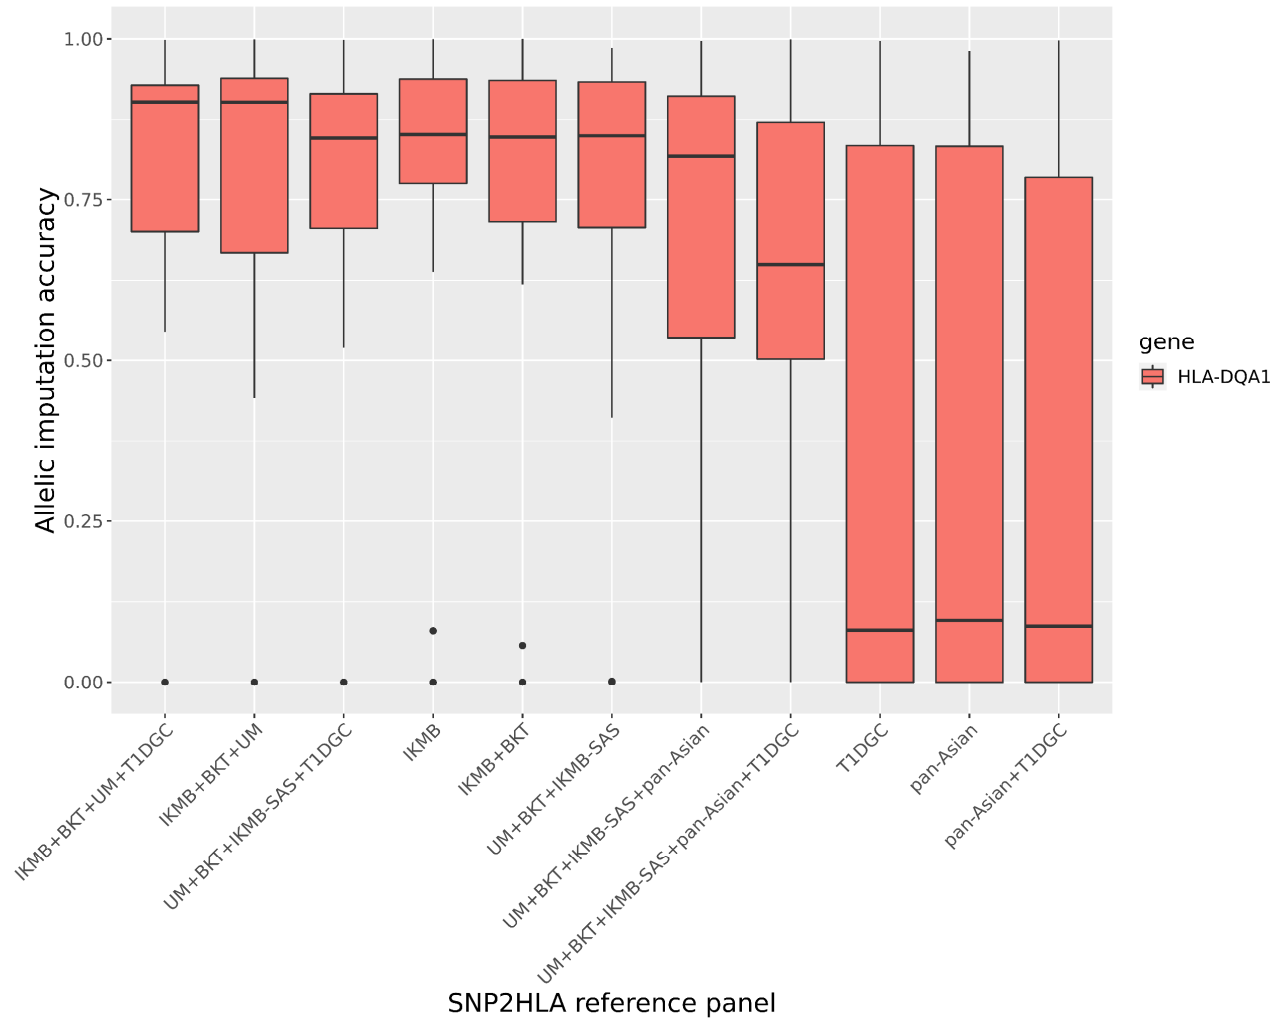

**Figure S11. Boxplots comparing allelic imputation accuracy of 2-field protein alleles for *HLA-DQA1* as a function of 11 different SNP2HLA reference panels for a validation set of 397 people of South Asian ancestry.** Panels are listed in decreasing order of their mean rank across 12 performance metrics based on the Wilcoxon signed rank test and the paired t-test. Allelic imputation accuracy is measured for each 2-field allele of *HLA-DQA1* in the reference panel by computing the squared Pearson correlation of vectors of genotyped and imputed dosages of that allele for all individuals in the validation set.

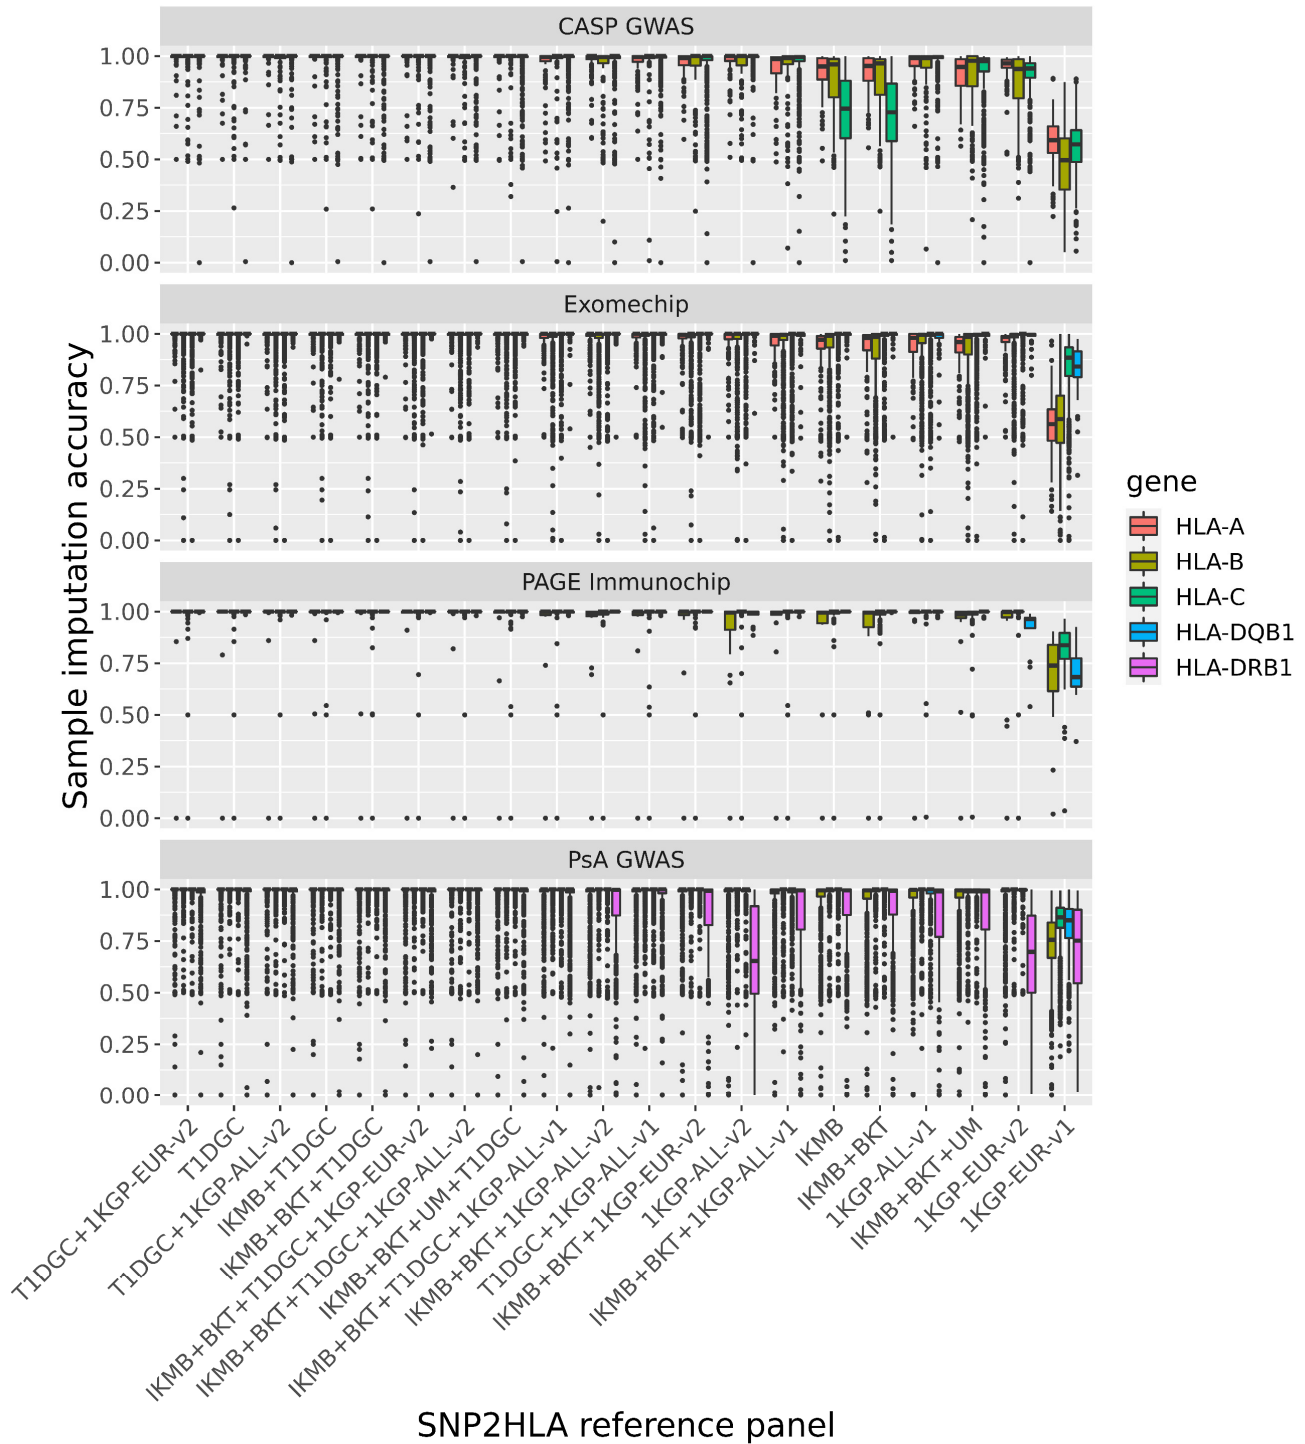

**Figure S12. Boxplots comparing sample imputation accuracy of 2-field protein alleles for five HLA genes as a function of 20 different SNP2HLA reference panels for four validation sets of people of European ancestry.** Panels are listed in decreasing order of the weighted mean across the four validation sets of their mean rank across 12 performance metrics based on the Wilcoxon signed rank test and the paired t-test. Sample imputation accuracy for a given HLA gene is measured for each individual in the validation set by subtracting, from 1, one-half of the sum for that individual of the positive differences in genotyped vs. imputed dosages of all 2-field alleles of that gene in the reference panel.

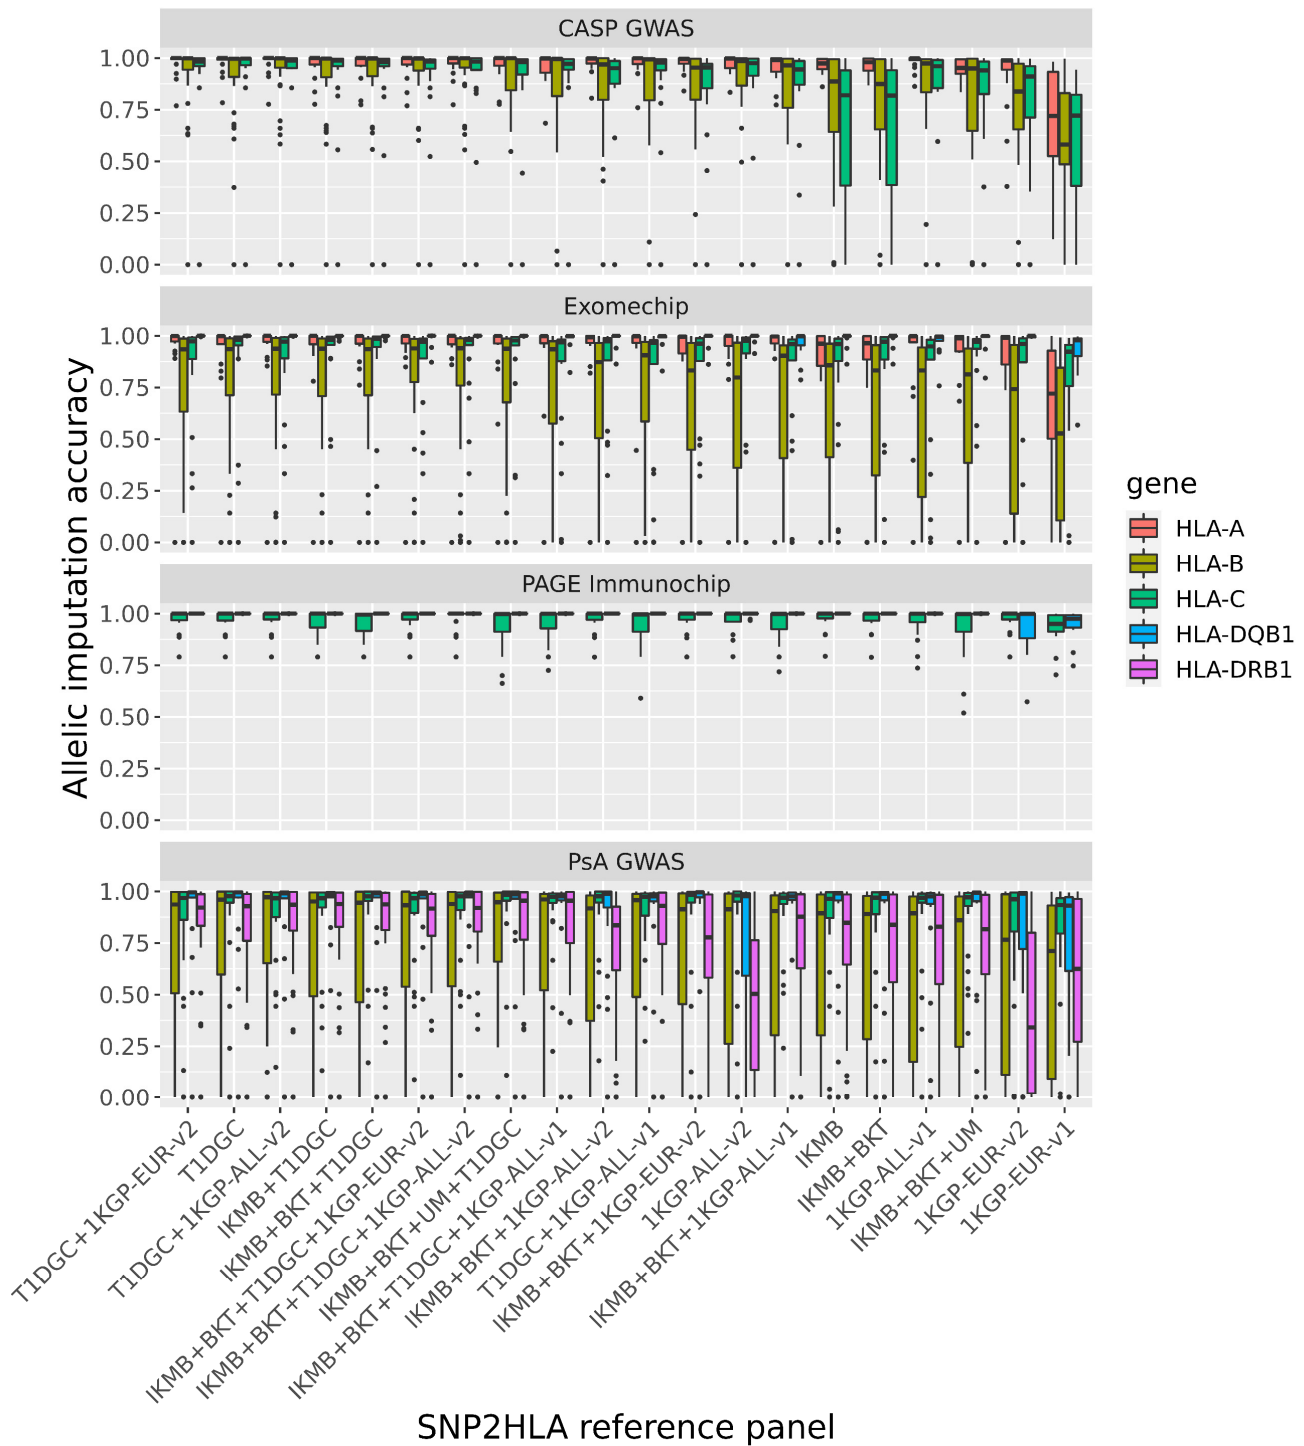

**Figure S13. Boxplots comparing allelic imputation accuracy of 2-field protein alleles for five HLA genes as a function of 20 different SNP2HLA reference panels for four validation sets of people of European ancestry.** Panels are listed in decreasing order of the weighted mean across the four validation sets of their mean rank across 12 performance metrics based on the Wilcoxon signed rank test and the paired t-test. Allelic imputation accuracy for a given HLA gene is measured for each 2-field allele of that gene in the reference panel by computing the squared Pearson correlation of vectors of genotyped and imputed dosages of that allele for all individuals in the validation set.

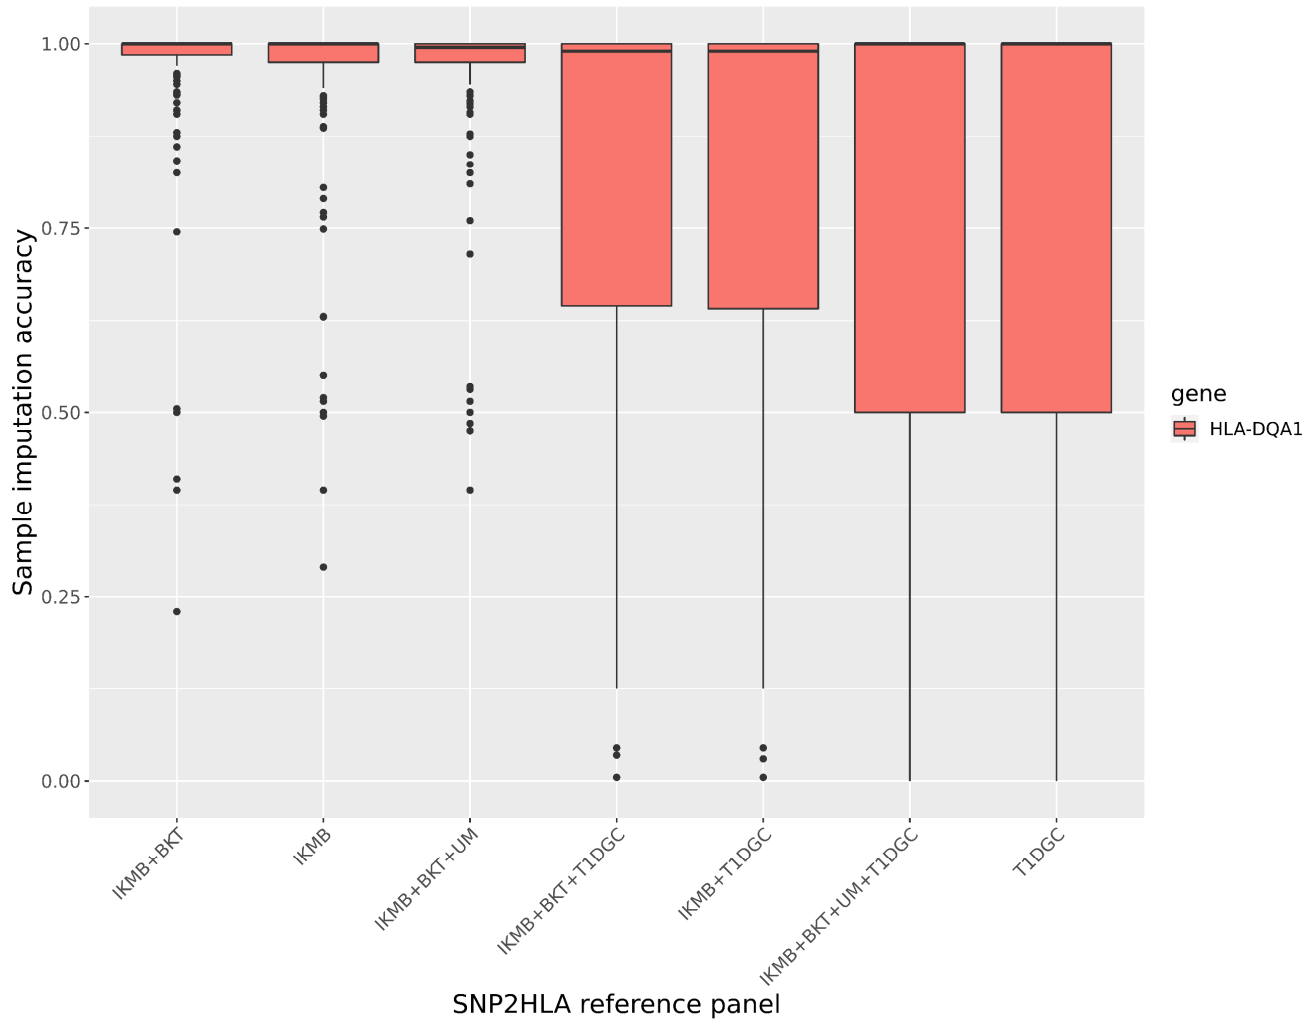

**Figure S14. Boxplots comparing sample imputation accuracy of 2-field protein alleles for *HLA-DQA1* as a function of seven different SNP2HLA reference panels for a validation set of 174 people of European ancestry.** Panels are listed in decreasing order of the weighted mean across the four validation sets of their mean rank across 12 performance metrics based on the Wilcoxon signed rank test and the paired t-test. Sample imputation accuracy is measured for each individual in the validation set by subtracting, from 1, one-half of the sum for that individual of the positive differences in genotyped vs. imputed dosages of all 2-field alleles of *HLA-DQA1* in the reference panel.

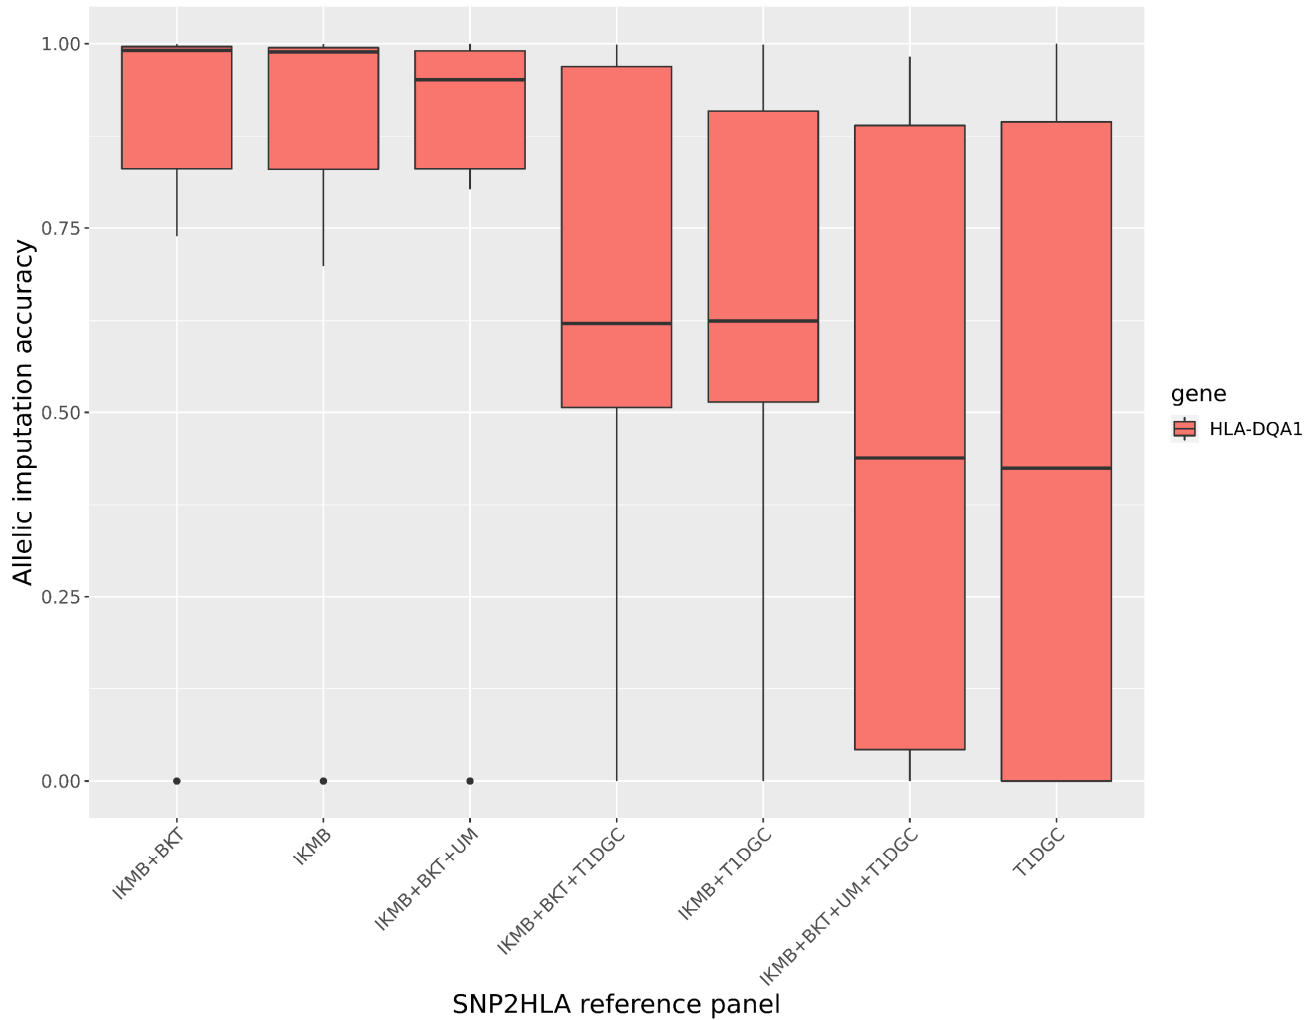

**Figure S15. Boxplots comparing allelic imputation accuracy of 2-field protein alleles for *HLA-DQA1* as a function of seven different SNP2HLA reference panels for a validation set of 174 people of European ancestry.** Panels are listed in decreasing order of the weighted mean across the four validation sets of their mean rank across 12 performance metrics based on the Wilcoxon signed rank test and the paired t-test. Allelic imputation accuracy is measured for each 2-field allele of *HLA-DQA1* in the reference panel by computing the squared Pearson correlation of vectors of genotyped and imputed dosages of that allele for all individuals in the validation set.

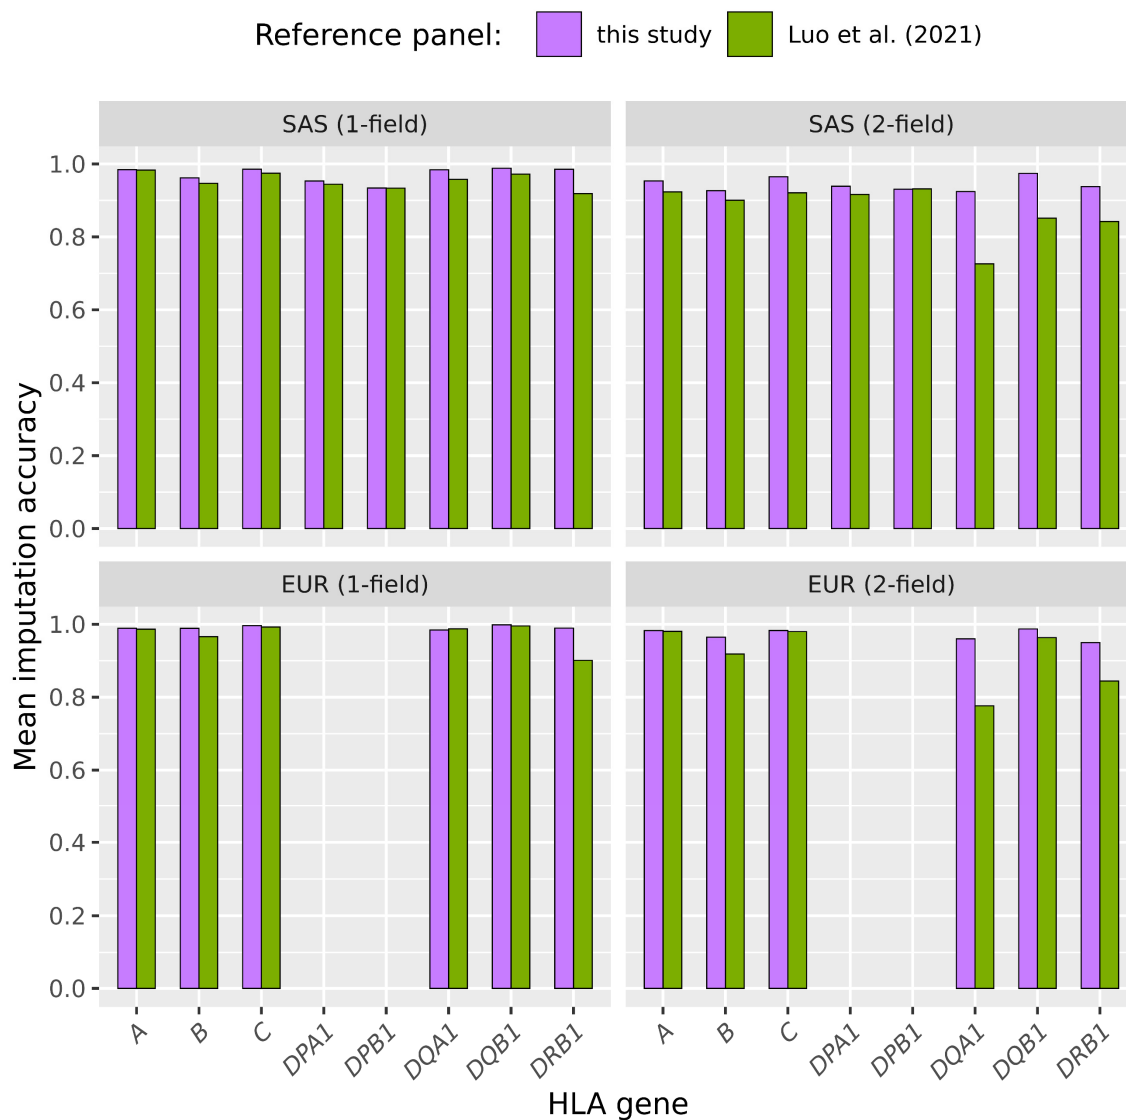

**Figure S16. Comparison of HLA imputation accuracies achieved with the best-performing reference panels of this study vs. those obtained using a recently published multi-ancestry panel.** Purple bars display accuracies achieved using the suite of best-performing HLA panels of this study for SAS targets (IKMB+BKT+UM+1KGP-ALL-v2 for *HLA-A,B,C,DQB1,DRB1*; IKMB+BKT+UM for *HLA-DPA1,DPB1*; IKMB+BKT+UM+T1DGC for *HLA-DQA1*) and for EUR targets (T1DGC+1KGP-EUR-v2 for *HLA-A,B,C,DQB1,DRB1*; IKMB+BKT for *HLA-DQA1*). Green bars display accuracy achieved for both SAS and EUR targets with a recently published multi-ancestry panel of 21,546 individuals<sup>1</sup> that is incorporated into the Michigan Imputation Server<sup>2</sup>. The target samples were the HLA-genotyped validation sets used by this study; namely 397 individuals of SAS ancestry and 174–3749 individuals of EUR ancestry. The top and bottom pairs of panels show results for 1- and 2-field allele resolution for SAS and EUR individuals, respectively.

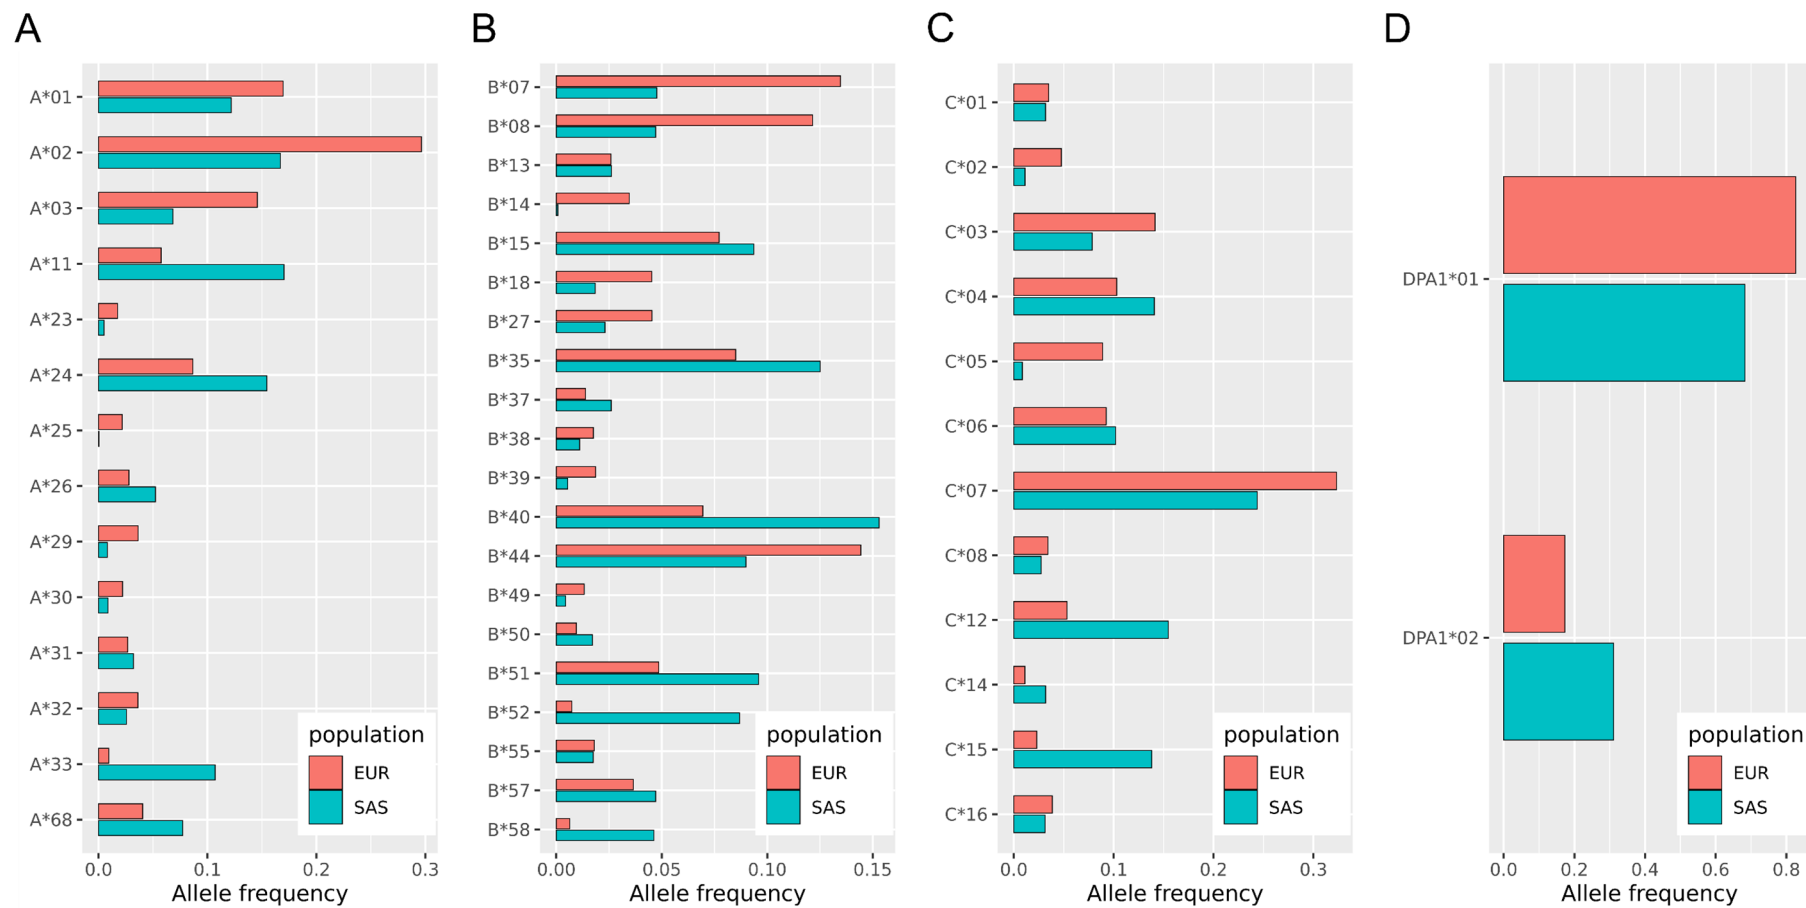

**Figure S17. Imputed 1-field *HLA-A*, *HLA-B*, *HLA-C* and *HLA-DPA1* allele frequencies for the European (EUR) and South Asian (SAS) datasets of this study.** Results for *HLA-A*, *HLA-B*, *HLA-C* and *HLA-DPA1* are shown in panels A, B, C and D, respectively. Frequencies for the EUR and SAS populations were estimated as a weighted average of frequencies in psoriasis cases and unaffected controls (weights = 0.015 and 0.985 for EUR and 0.003 and 0.997 for SAS). Alleles with frequencies < 0.01 in both populations are omitted.

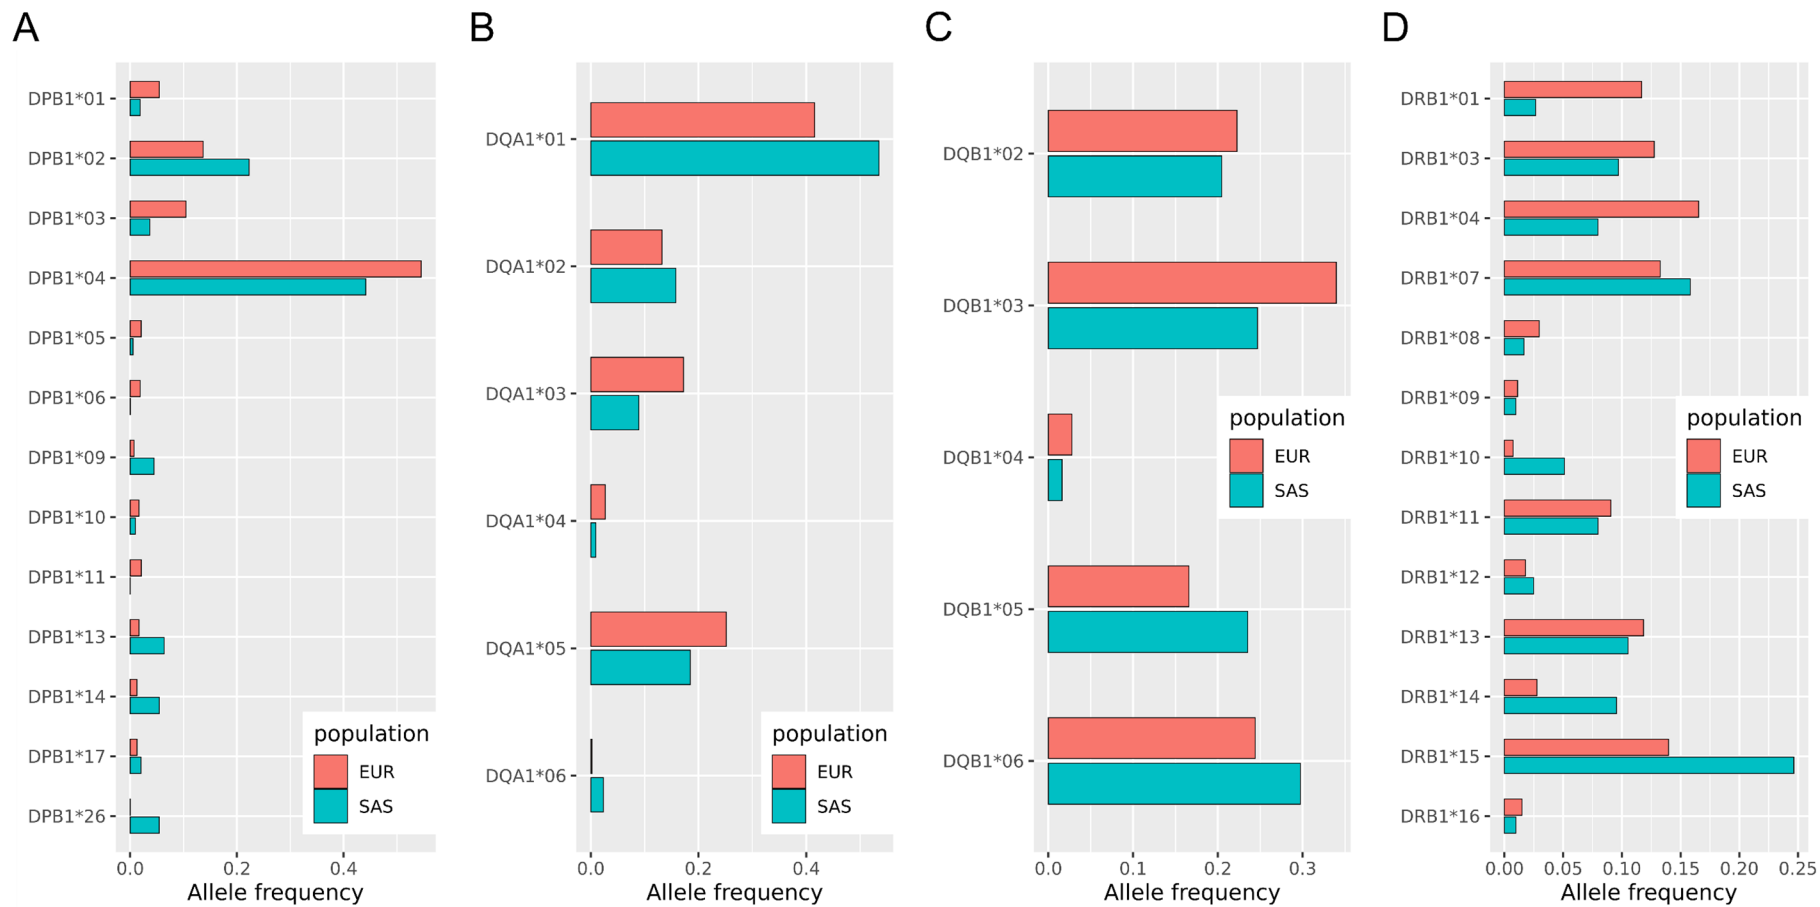

**Figure S18. Imputed 1-field *HLA-DPB1*, *HLA-DQA1*, *HLA-DQB1* and *HLA-DRB1* allele frequencies for the European (EUR) and South Asian (SAS) datasets of this study.** Results for *HLA-DPB1*, *HLA-DQA1*, *HLA-DQB1* and *HLA-DRB1* are shown in panels A, B, C and D, respectively. Frequencies for the EUR and SAS populations were estimated as a weighted average of frequencies in psoriasis cases and unaffected controls (weights = 0.015 and 0.985 for EUR and 0.003 and 0.997 for SAS). Alleles with frequencies < 0.01 in both populations are omitted.



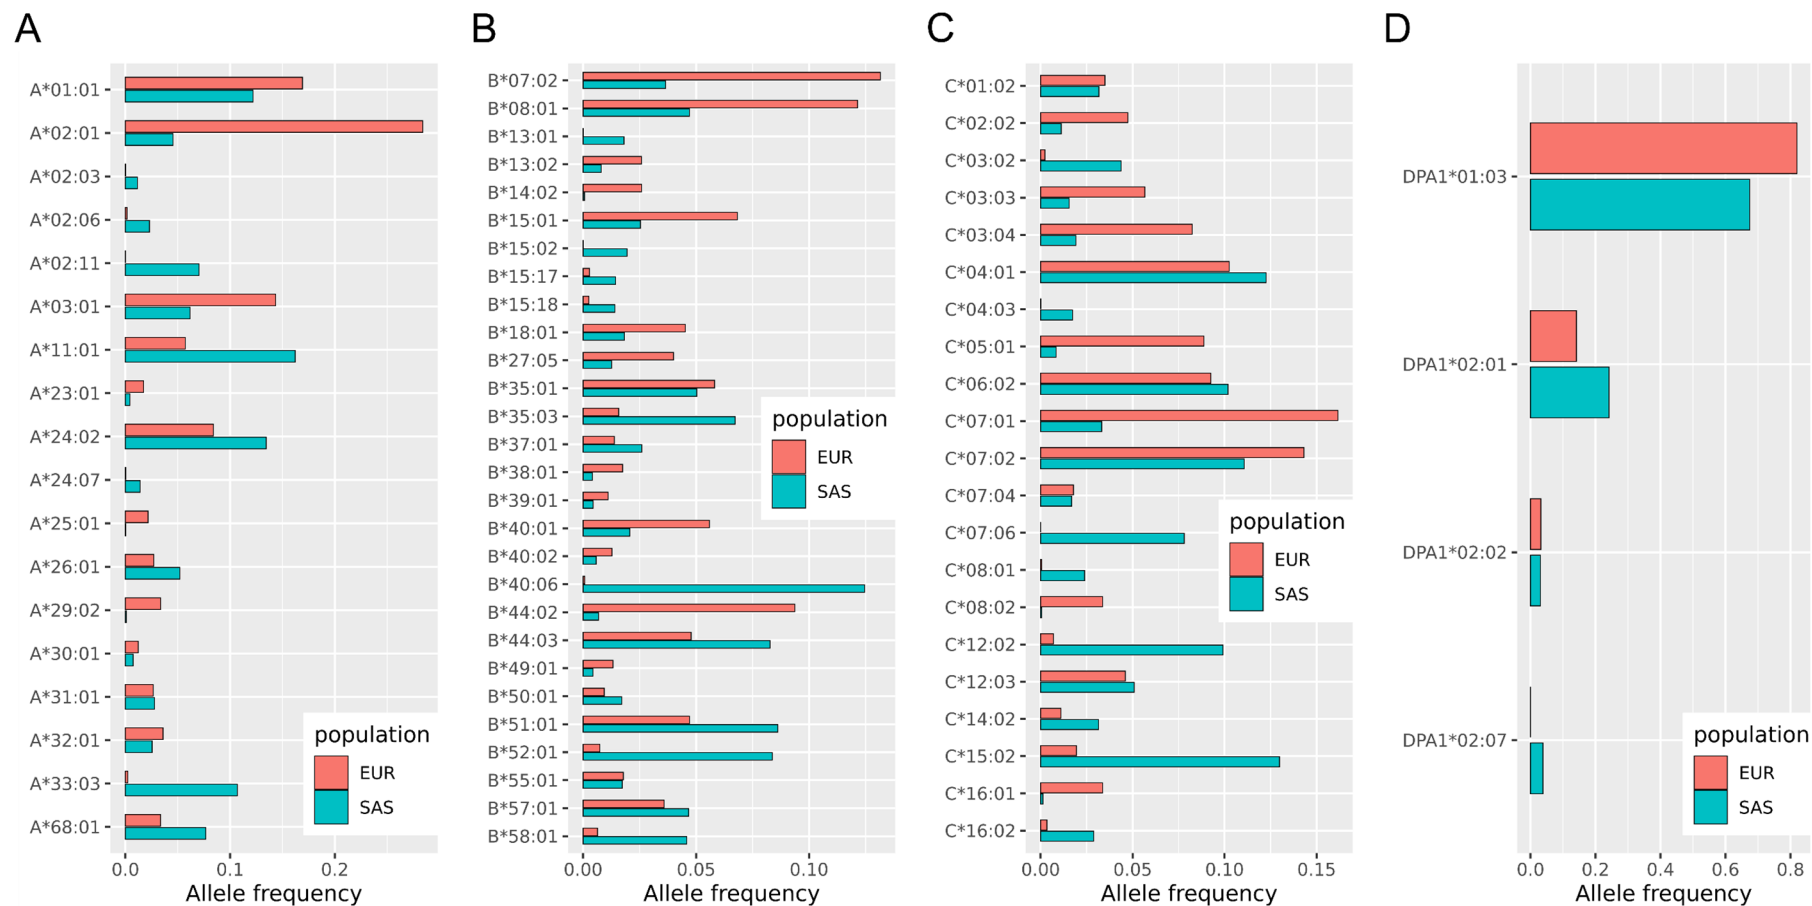

**Figure S19. Imputed 2-field HLA-A, HLA-B, HLA-C and HLA-DPA1 allele frequencies for the European (EUR) and South Asian (SAS) datasets of this study.** Results for HLA-A, HLA-B, HLA-C and HLA-DPA1 are shown in panels A, B, C and D, respectively. Frequencies for the EUR and SAS populations were estimated as a weighted average of frequencies in psoriasis cases and unaffected controls (weights = 0.0015 and 0.9985 for EUR and 0.003 and 0.997 for SAS). Alleles with frequencies < 0.01 in both populations are omitted.

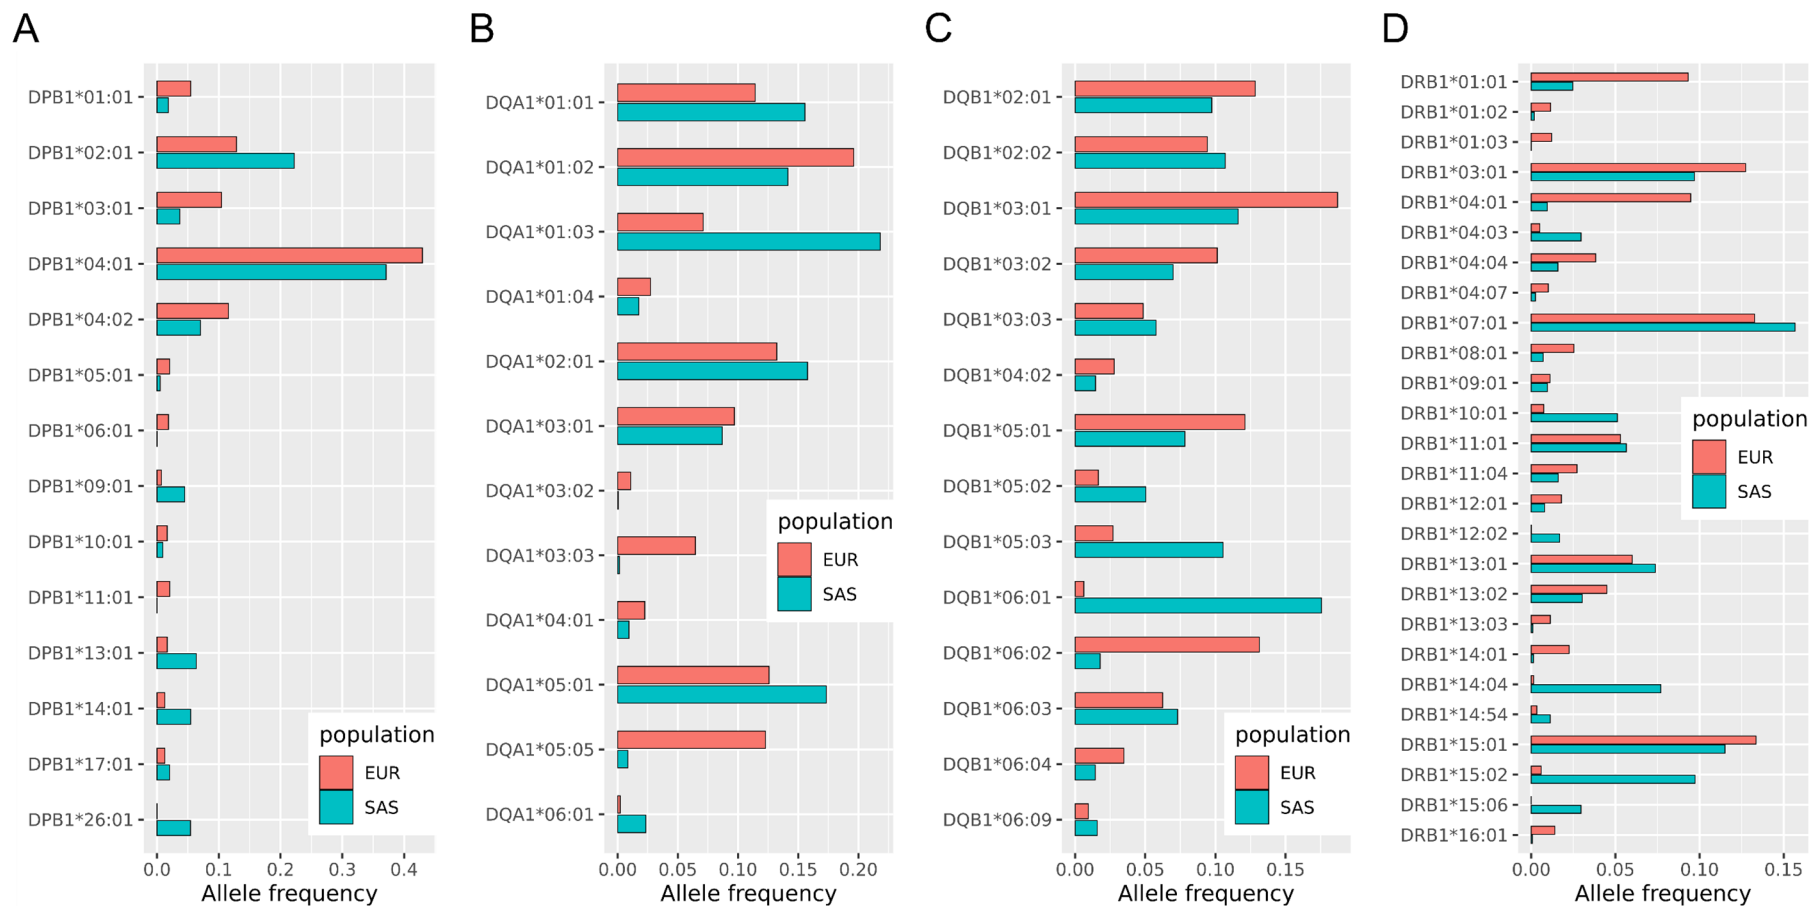

**Figure S20. Imputed 2-field *HLA-DPB1*, *HLA-DQA1*, *HLA-DQB1* and *HLA-DRB1* allele frequencies for the European (EUR) and South Asian (SAS) datasets of this study.** Results for *HLA-DPB1*, *HLA-DQA1*, *HLA-DQB1* and *HLA-DRB1* are shown in panels A, B, C and D, respectively. Frequencies for the EUR and SAS populations were estimated as a weighted average of frequencies in psoriasis cases and unaffected controls (weights = 0.015 and 0.985 for EUR and 0.003 and 0.997 for SAS). Alleles with frequencies < 0.01 in both populations are omitted.

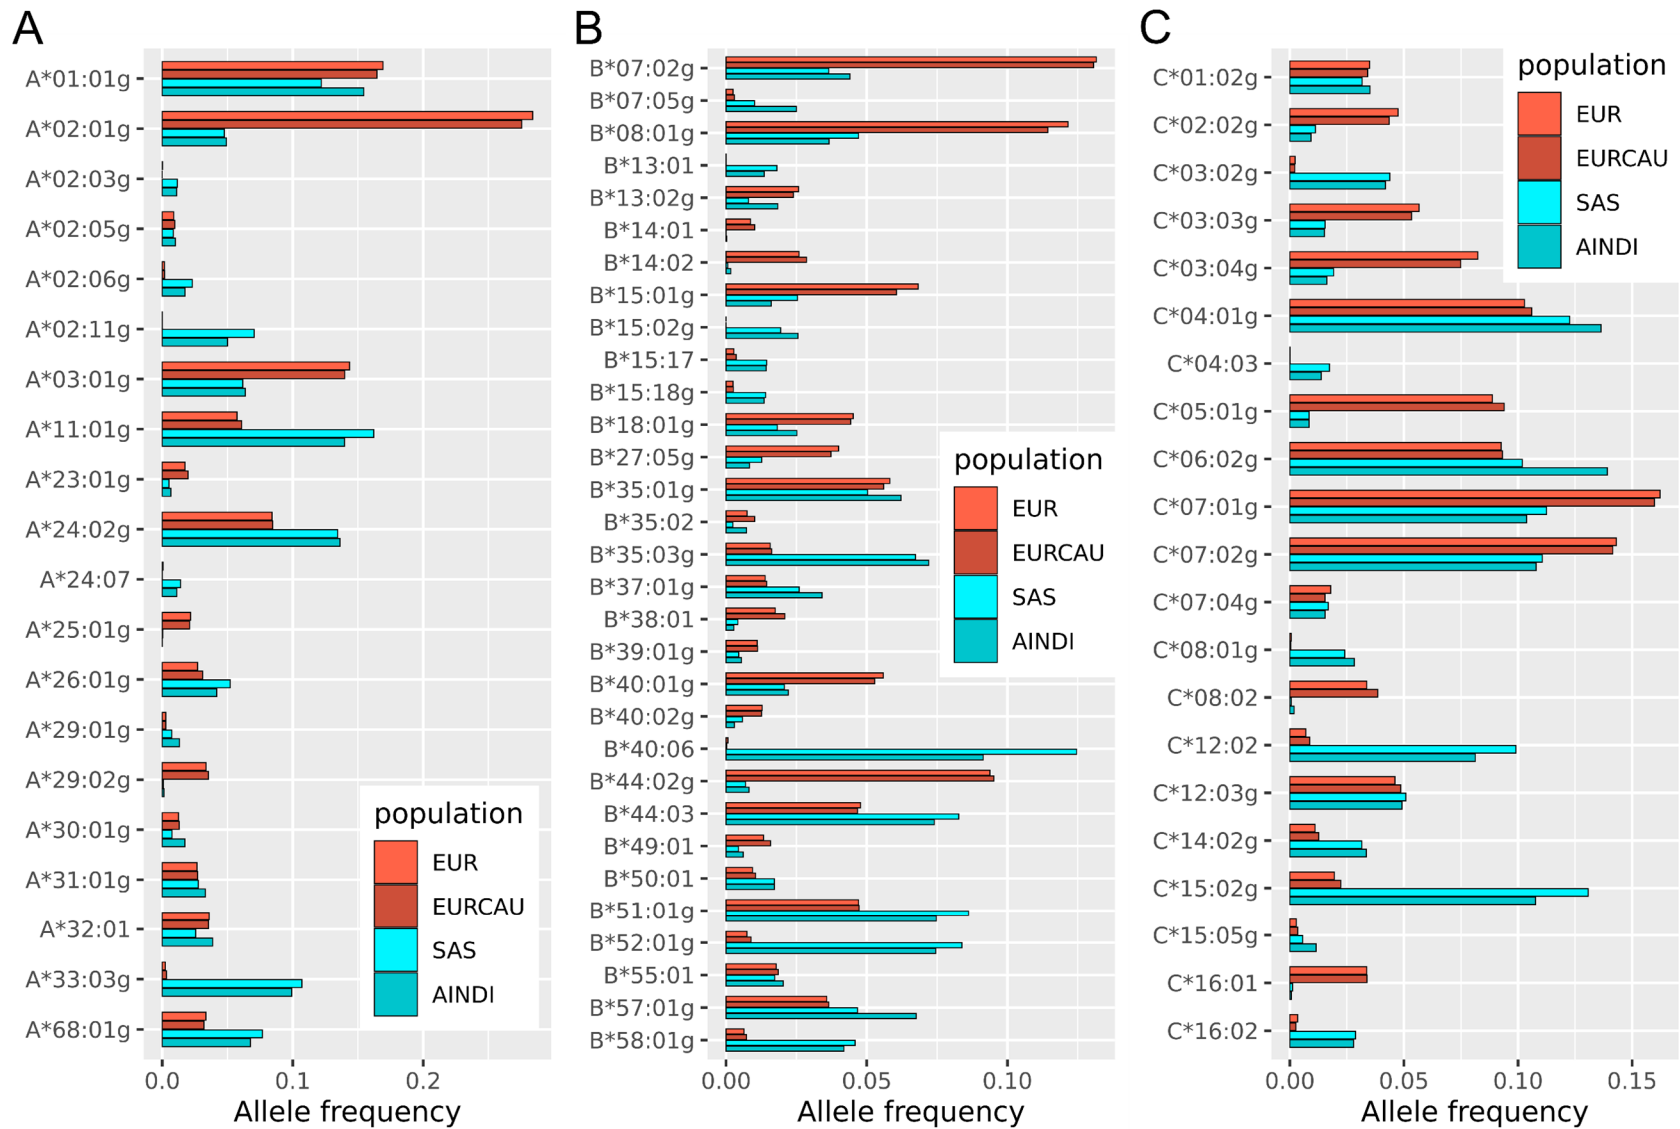

**Figure S21. Comparison of imputed HLA class I frequencies for this study with genotyped HLA frequencies for corresponding populations in the National Marrow Donor Program (NMDP) database.** HLA allele frequencies estimated for European (EUR) and South Asian (SAS) individuals of this study (bright red and bright cyan, respectively) are plotted next to allele frequencies for European (EURCAU) and South Asian (AINDI) individuals in the NMDP database (dark red and dark cyan, respectively).<sup>3</sup> Results for *HLA-A*, *HLA-B*, and *HLA-C* are shown in panels A, B and C, respectively. 2-field alleles for this study were aggregated, when necessary, to match the g-group designations used by NMDP, which distinguishes alleles that vary in amino acid sequence for the antigen recognition site coded for by exons 2 and 3 of class I and exon 2 of class II HLA genes. Alleles with frequencies < 0.01 in both populations are omitted.

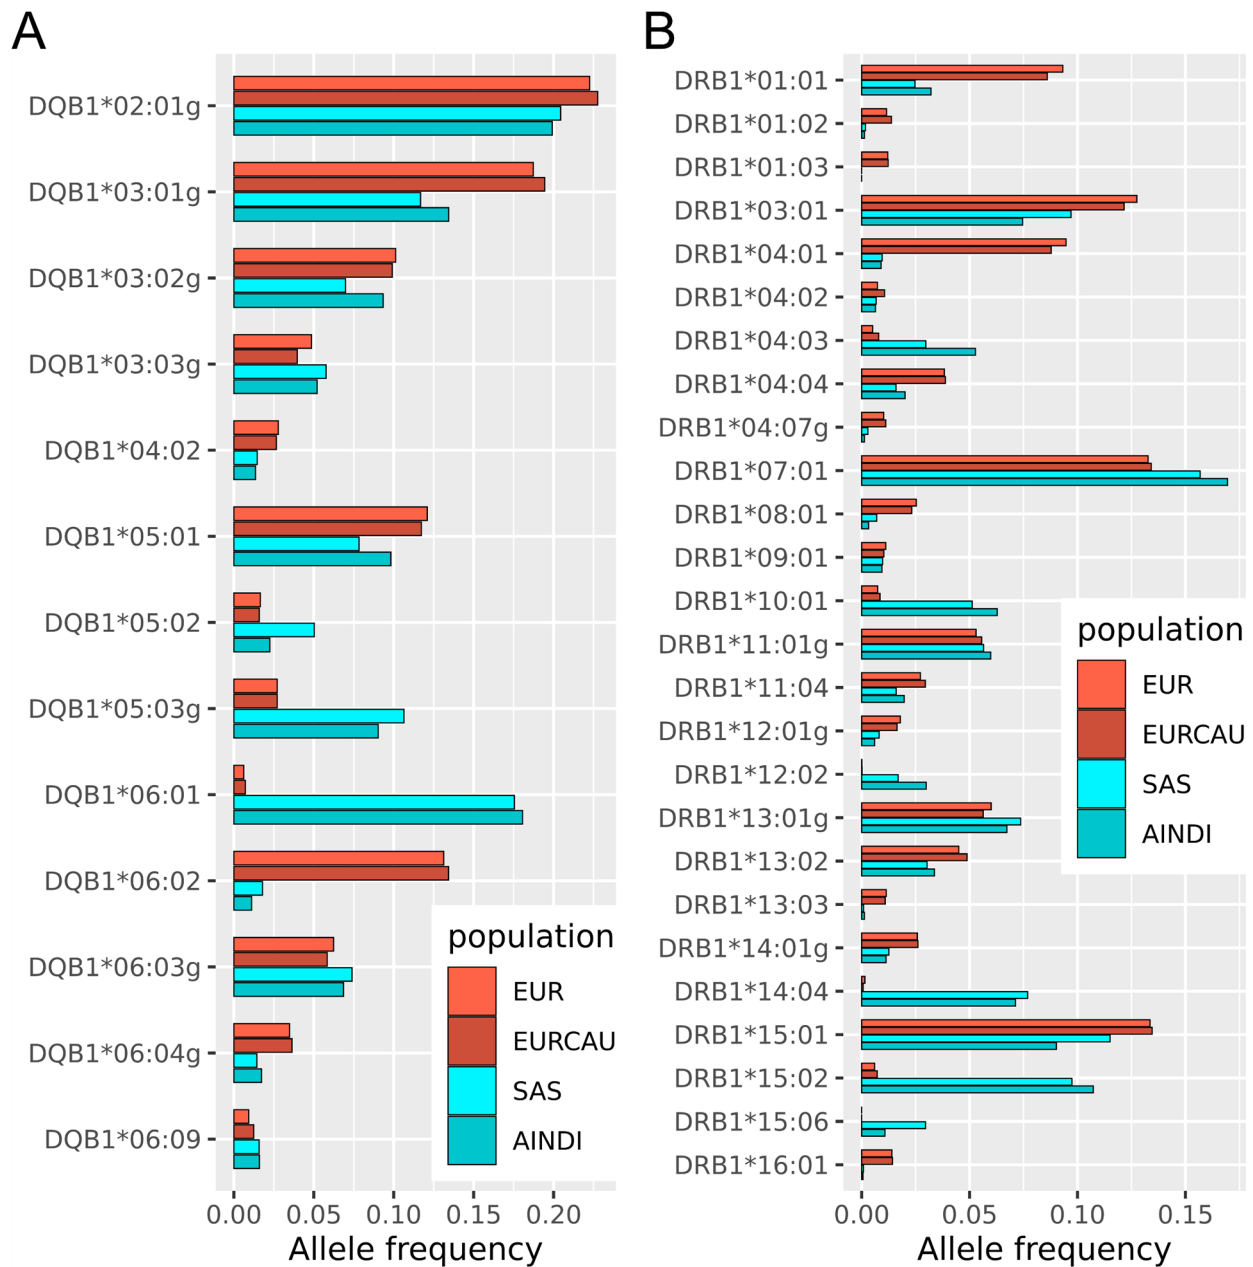

**Figure S22. Comparison of imputed HLA class II frequencies for this study with genotyped HLA frequencies for corresponding populations in the National Marrow Donor Program (NMDP) database.** HLA allele frequencies estimated for European (EUR) and South Asian (SAS) individuals of this study (bright red and bright cyan, respectively) are plotted next to allele frequencies for European (EURCAU) and South Asian (AINDI) individuals in the NMDP database (dark red and dark cyan, respectively).<sup>3</sup> Results for *HLA-DQB1* and *HLA-DRB1* are shown in panels A and B, respectively. 2-field alleles for this study were aggregated, when necessary, to match the g-group designations used by NMDP, which distinguishes alleles that vary in amino acid sequence for the antigen recognition site coded for by exons 2 and 3 of class I and exon 2 of class II HLA genes. Alleles with frequencies < 0.01 in both populations are omitted.

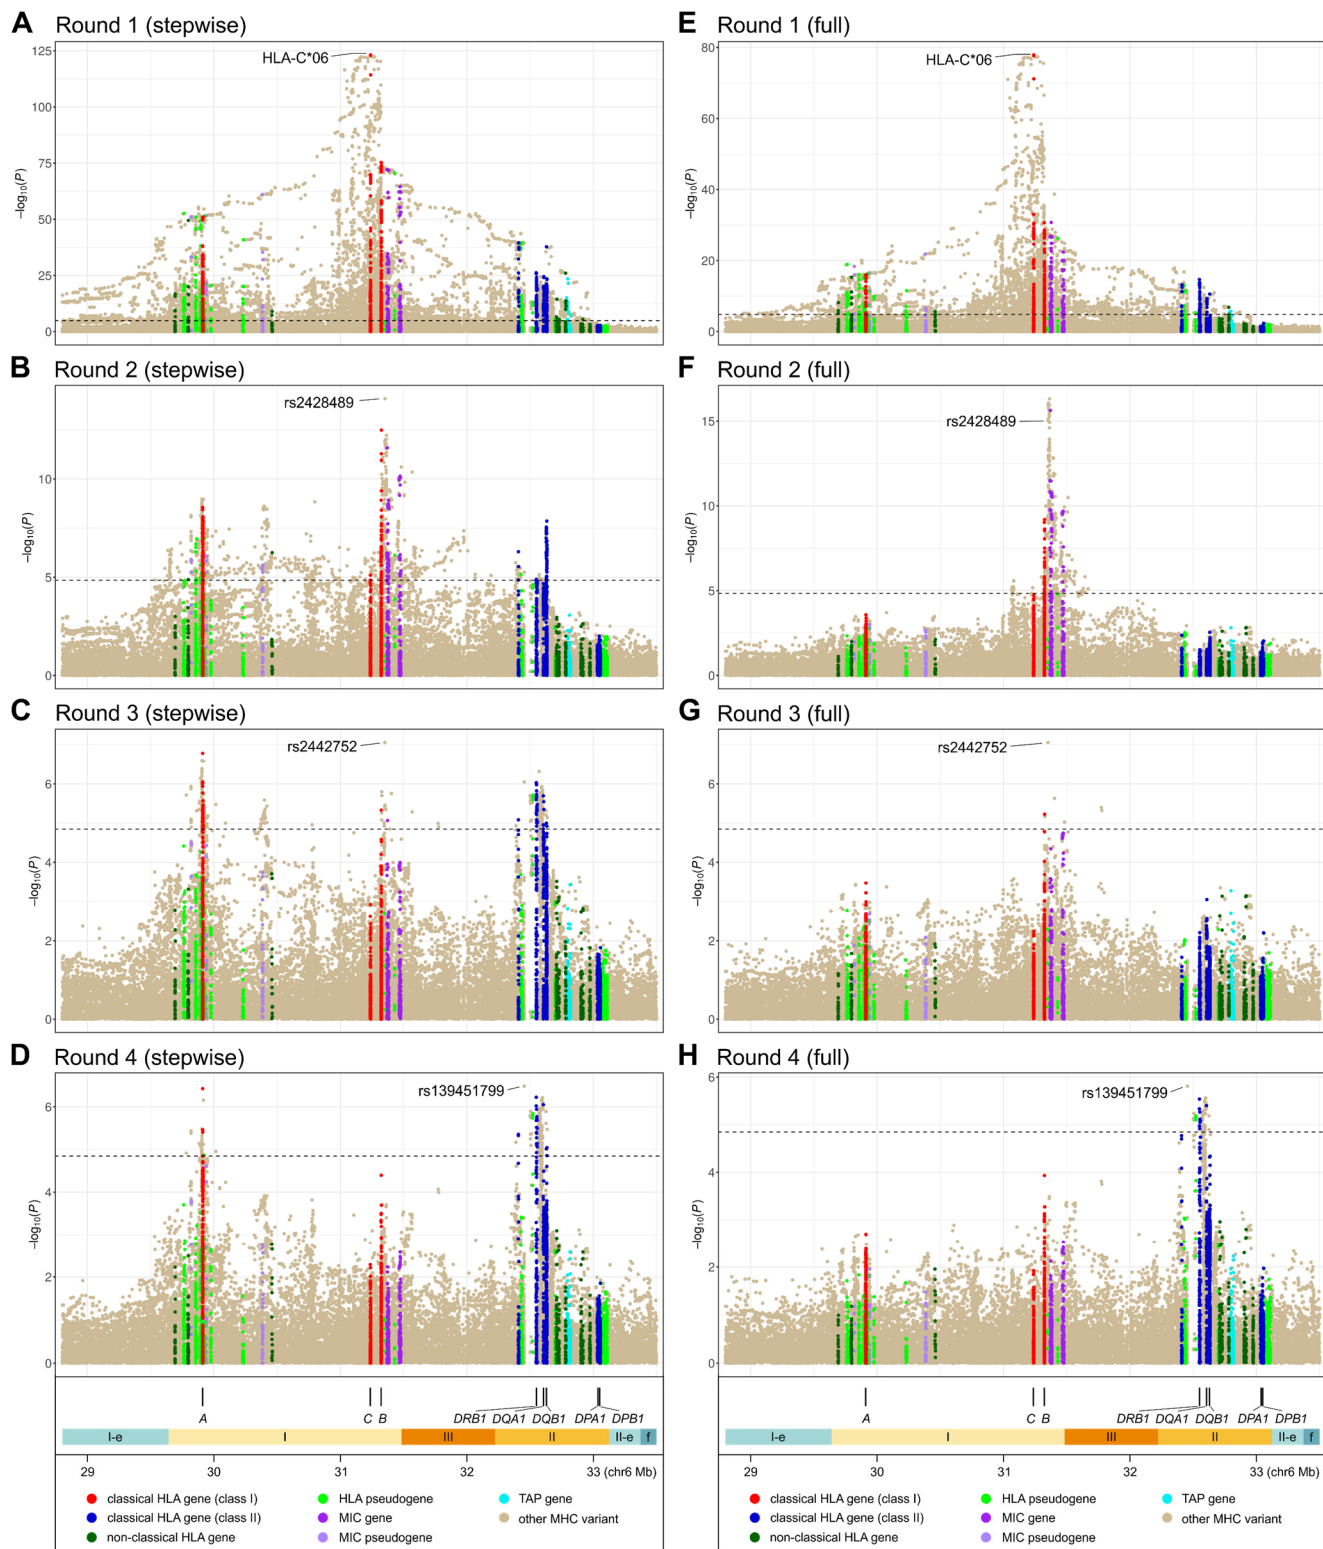

**Figure S23. Plots of rounds 1–4 of stepwise analysis of psoriasis association in the extended MHC region in people of South Asian ancestry.** The left 4 panels (A–D) show association results after each stepwise round; the right 4 panels (E–H) show association results for the final full regression model containing all variants identified by the stepwise analysis except the one selected at that specific round. Each circle represents the  $-\log_{10}(p)$  of association of an imputed variant, color-coded based on its membership in various categories of MHC genes, as detailed in the key at the bottom. Dashed lines denote thresholds of Bonferroni-corrected significance of 0.05. The locations of the eight HLA genes for which amino acid and protein alleles were imputed are shown at the bottom, along with colored segments denoting the boundaries of the classical MHC region (class I, II and III), the extended MHC class I (I-e) and II (II-e) regions, and flanking MHC regions (f).

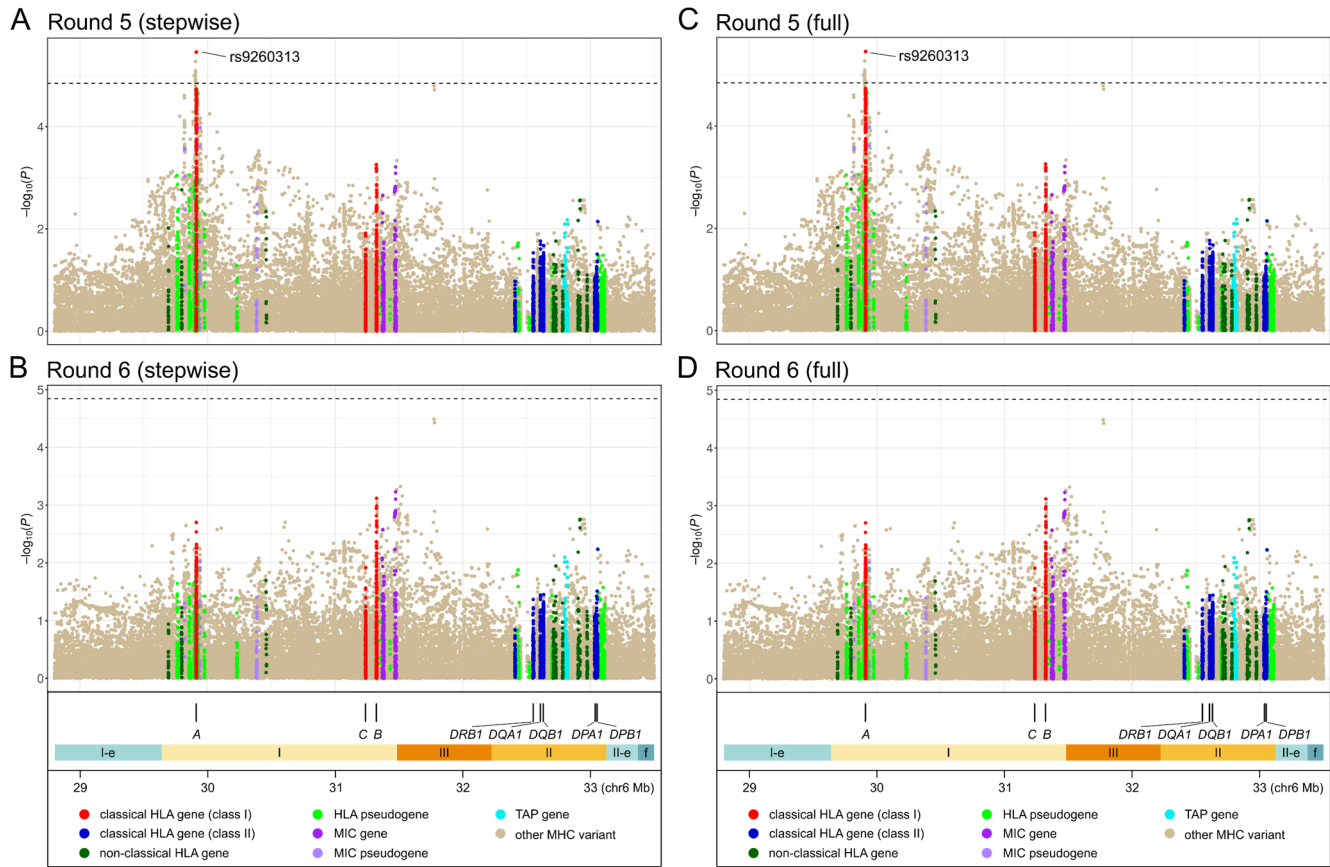

**Figure S24. Plots of rounds 5–6 of stepwise analysis of psoriasis association in the extended MHC region in people of South Asian ancestry.** The left 2 panels (A–B) show association results after each stepwise round; the right 2 panels (C–D) show association results for the final full regression model containing all variants identified by the stepwise analysis except the one selected at that specific round. Each circle represents the  $-\log(p)$  of association of an imputed variant, color-coded based on its membership in various categories of MHC genes, as detailed in the key at the bottom. Dashed lines denote thresholds of Bonferroni-corrected significance of 0.05. The locations of the eight HLA genes for which amino acid and protein alleles were imputed are shown at the bottom, along with colored segments denoting the boundaries of the classical MHC region (class I, II and III), the extended MHC class I (I-e) and II (II-e) regions, and flanking MHC regions (f).

|                                                                 |          |                       | South Asian model |                       |                 |                   |                       |
|-----------------------------------------------------------------|----------|-----------------------|-------------------|-----------------------|-----------------|-------------------|-----------------------|
|                                                                 |          |                       | HLA-A             | HLA-C                 | —               | MICA              | HLA-DRB1              |
| Linkage disequilibrium<br>( $W_n^2$ ) in South Asian<br>dataset |          |                       | rs9260313 (C,T)   | HLA-C*06 (C*06,other) | rs2442752 (C,T) | rs2428489 (A,C,T) | rs139451799 (—,other) |
|                                                                 |          |                       | HLA-A             | rs9260313 (C,T)       | —               | 0.06              | 0.03                  |
| South Asian model                                               | HLA-C    | HLA-C*06 (C*06,other) | 0.06              | —                     | 0.11            | 0.08              | 0.04                  |
|                                                                 | —        | rs2442752 (C,T)       | 0.03              | 0.11                  | —               | 0.17              | 0.00                  |
|                                                                 | MICA     | rs2428489 (A,C,T)     | 0.04              | 0.08                  | 0.17            | —                 | 0.05                  |
|                                                                 | HLA-DRB1 | rs139451799 (—,other) | 0.00              | 0.04                  | 0.00            | 0.05              | —                     |

**Figure S25. Matrix of pairwise linkage disequilibrium among variants of the South Asian association model for the MHC region.** Variants are listed in the order of their position on chromosome 6, with the alleles used to compute LD in parentheses after each variant. LD values are for the multiallelic  $W_n^2$  coefficient computed in the South Asian dataset, which reduces to the usual  $r^2$  coefficient when both variants of a pair are biallelic. The magnitude of LD values is accentuated with red shading on a 0 (white) to 1 (dark red) scale. Variants are labeled with a gene name if the variant changes that gene's protein sequence or if it is in substantial LD ( $W_n^2 \geq 0.4$ ) with a protein-changing variant for the gene.

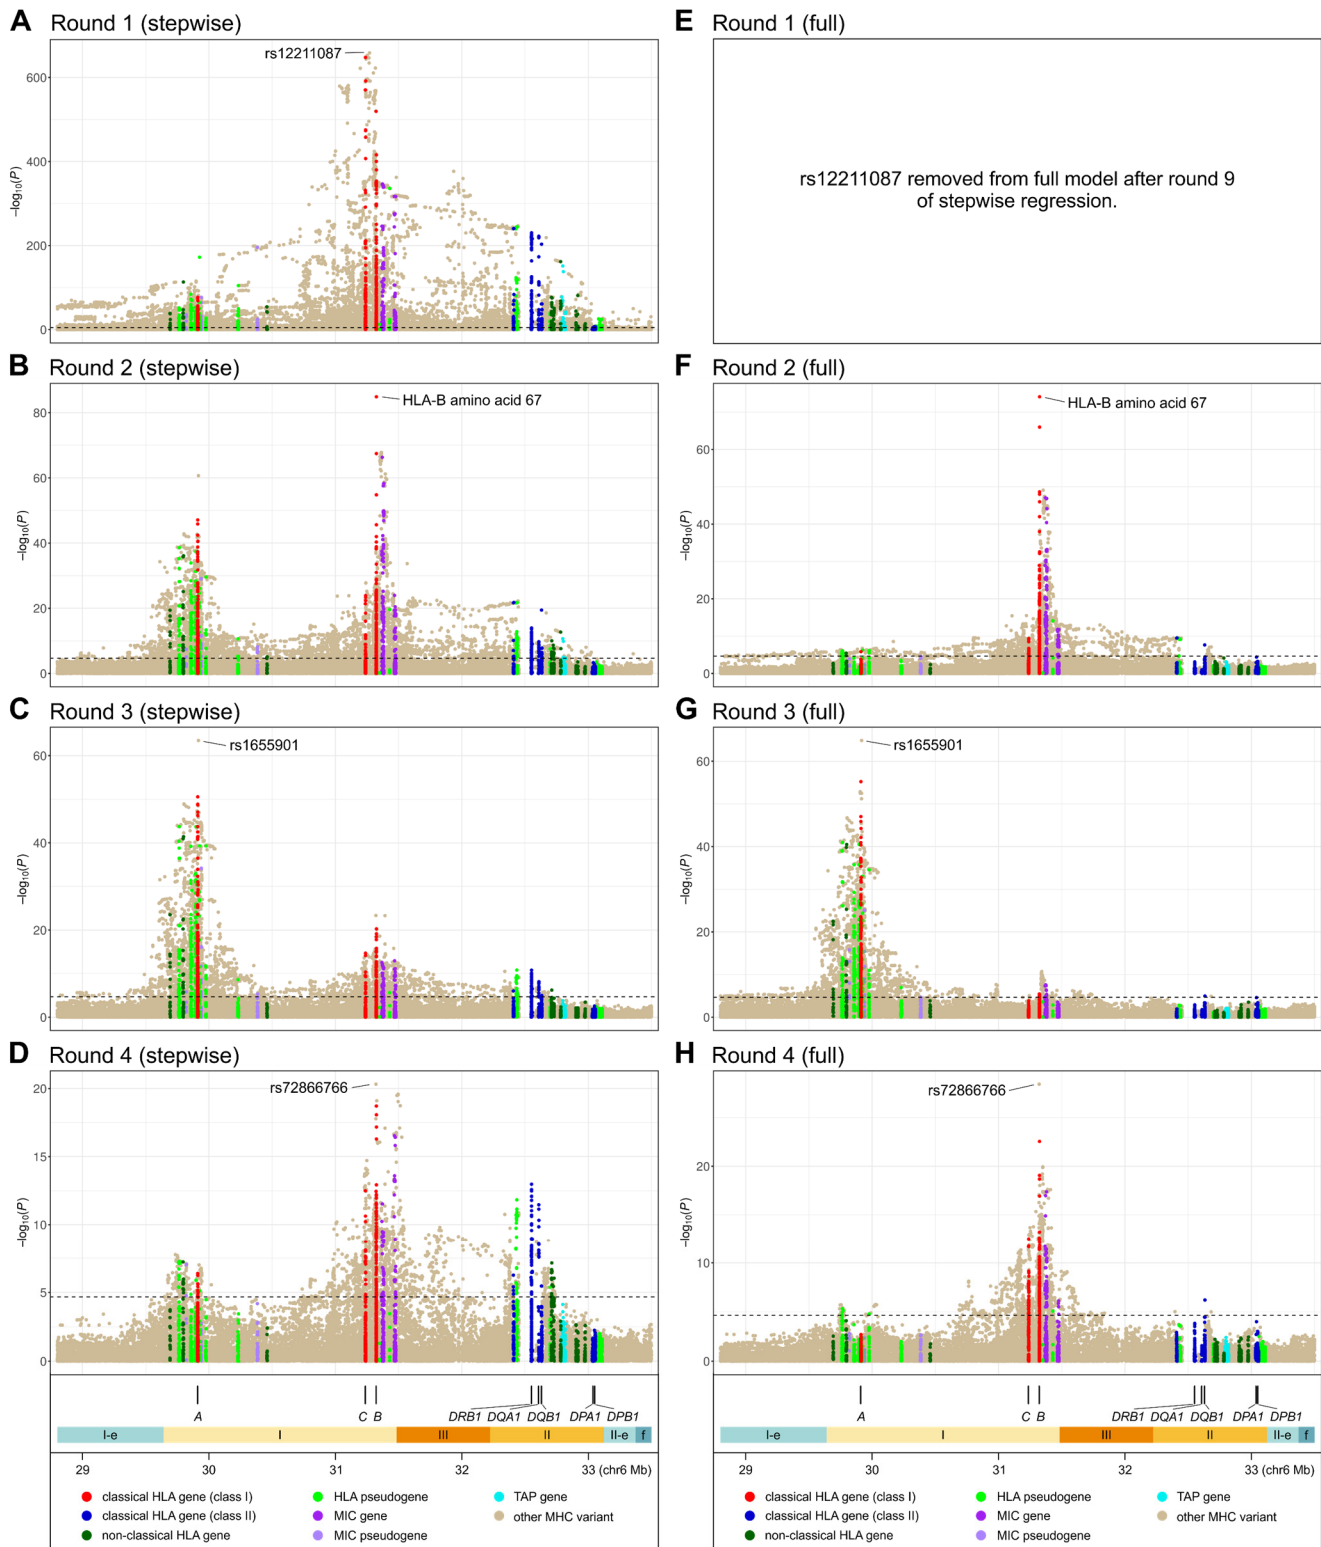

**Figure S26. Plots of rounds 1–4 of stepwise analysis of psoriasis association in the extended MHC region in people of European ancestry.** The left 4 panels (A–D) show association results after each stepwise round; the right 4 panels (E–H) show association results for the final full regression model containing all variants identified by the stepwise analysis except the one selected at that specific round. Each circle represents the  $-\log(p)$  of association of an imputed variant, color-coded based on its membership in various categories of MHC genes, as detailed in the key at the bottom. Dashed lines denote thresholds of Bonferroni-corrected significance of 0.05. The locations of the eight HLA genes for which amino acid and protein alleles were imputed are shown at the bottom, along with colored segments denoting the boundaries of the classical MHC region (class I, II and III), the extended MHC class I (I-e) and II (II-e) regions, and flanking MHC regions (f).



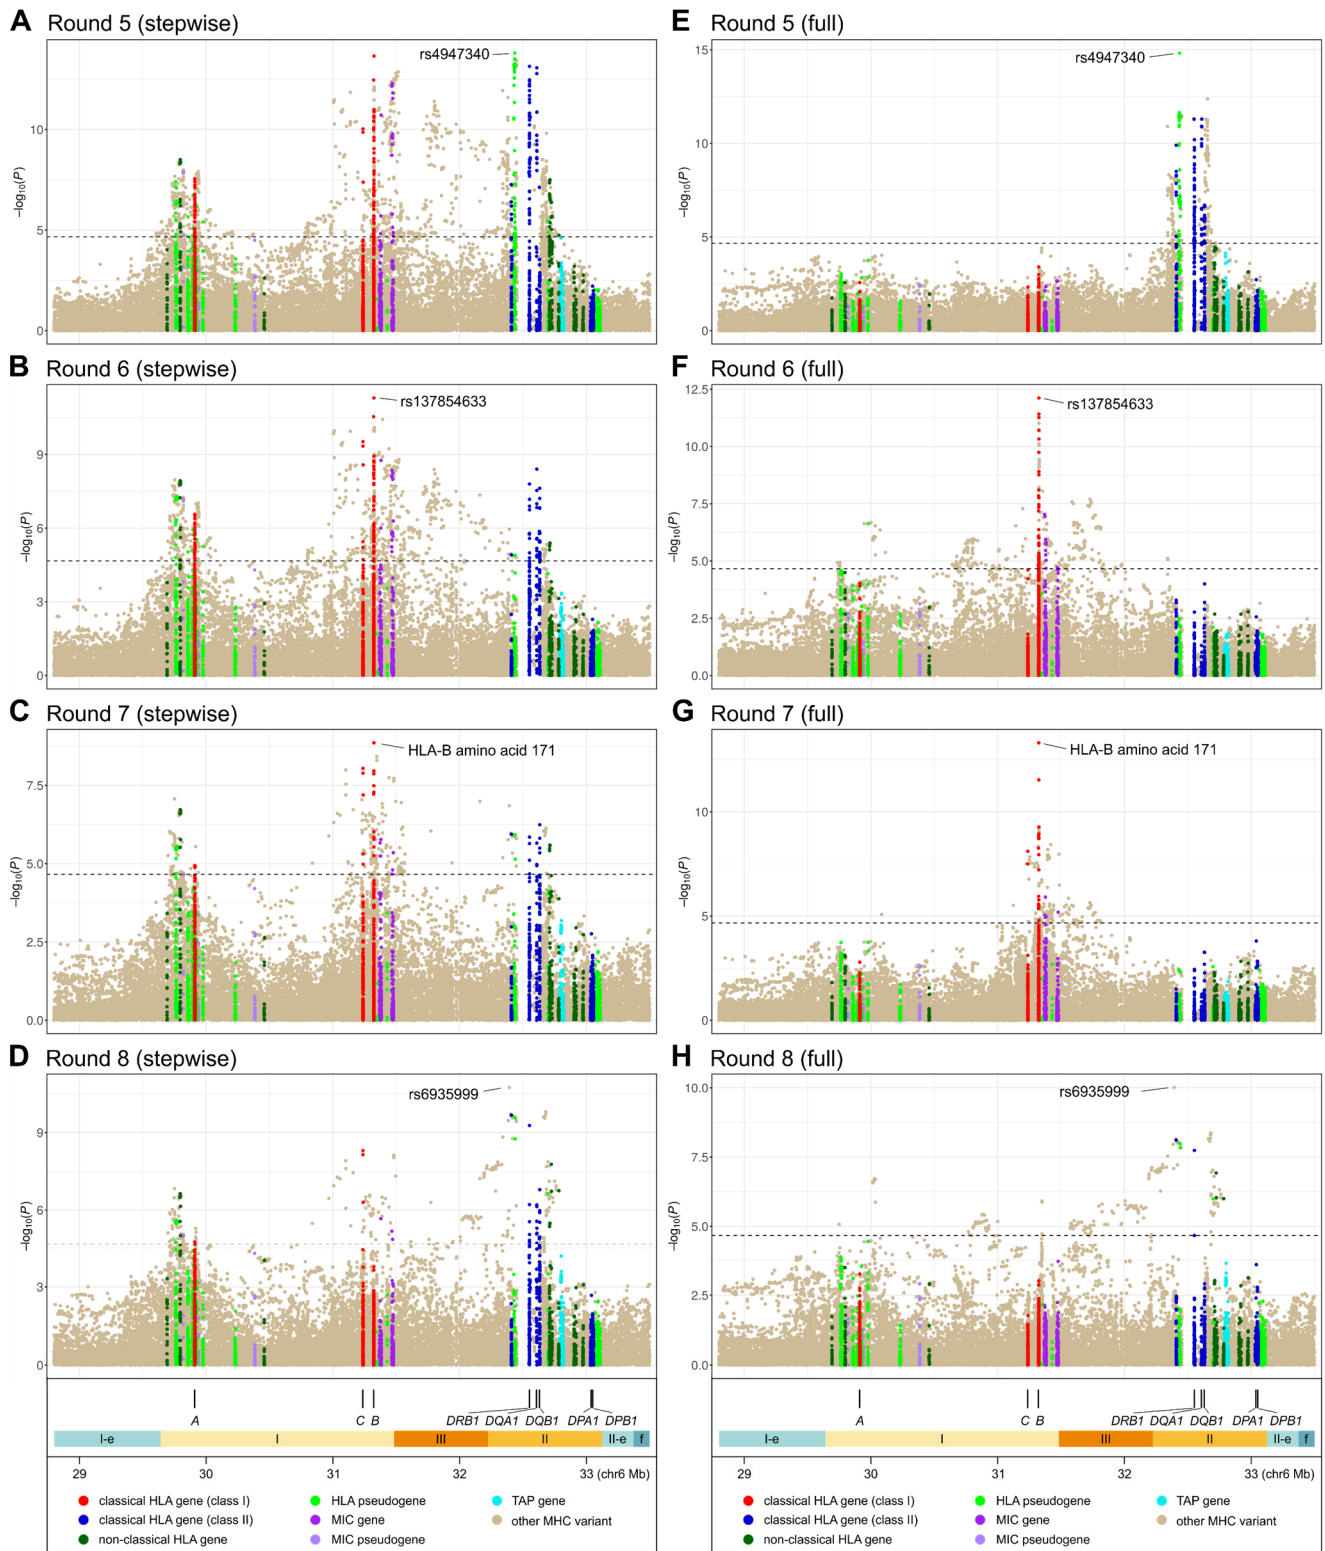

**Figure S27. Plots of rounds 5–8 of stepwise analysis of psoriasis association in the extended MHC region in people of European ancestry.** The left 4 panels (A–D) show association results after each stepwise round; the right 4 panels (E–H) show association results for the final full regression model containing all variants identified by the stepwise analysis except the one selected at that specific round. Each circle represents the  $-\log(p)$  of association of an imputed variant, color-coded based on its membership in various categories of MHC genes, as detailed in the key at the bottom. Dashed lines denote thresholds of Bonferroni-corrected significance of 0.05. The locations of the eight HLA genes for which amino acid and protein alleles were imputed are shown at the bottom, along with colored segments denoting the boundaries of the classical MHC region (class I, II and III), the extended MHC class I (I-e) and II (II-e) regions, and flanking MHC regions (f).

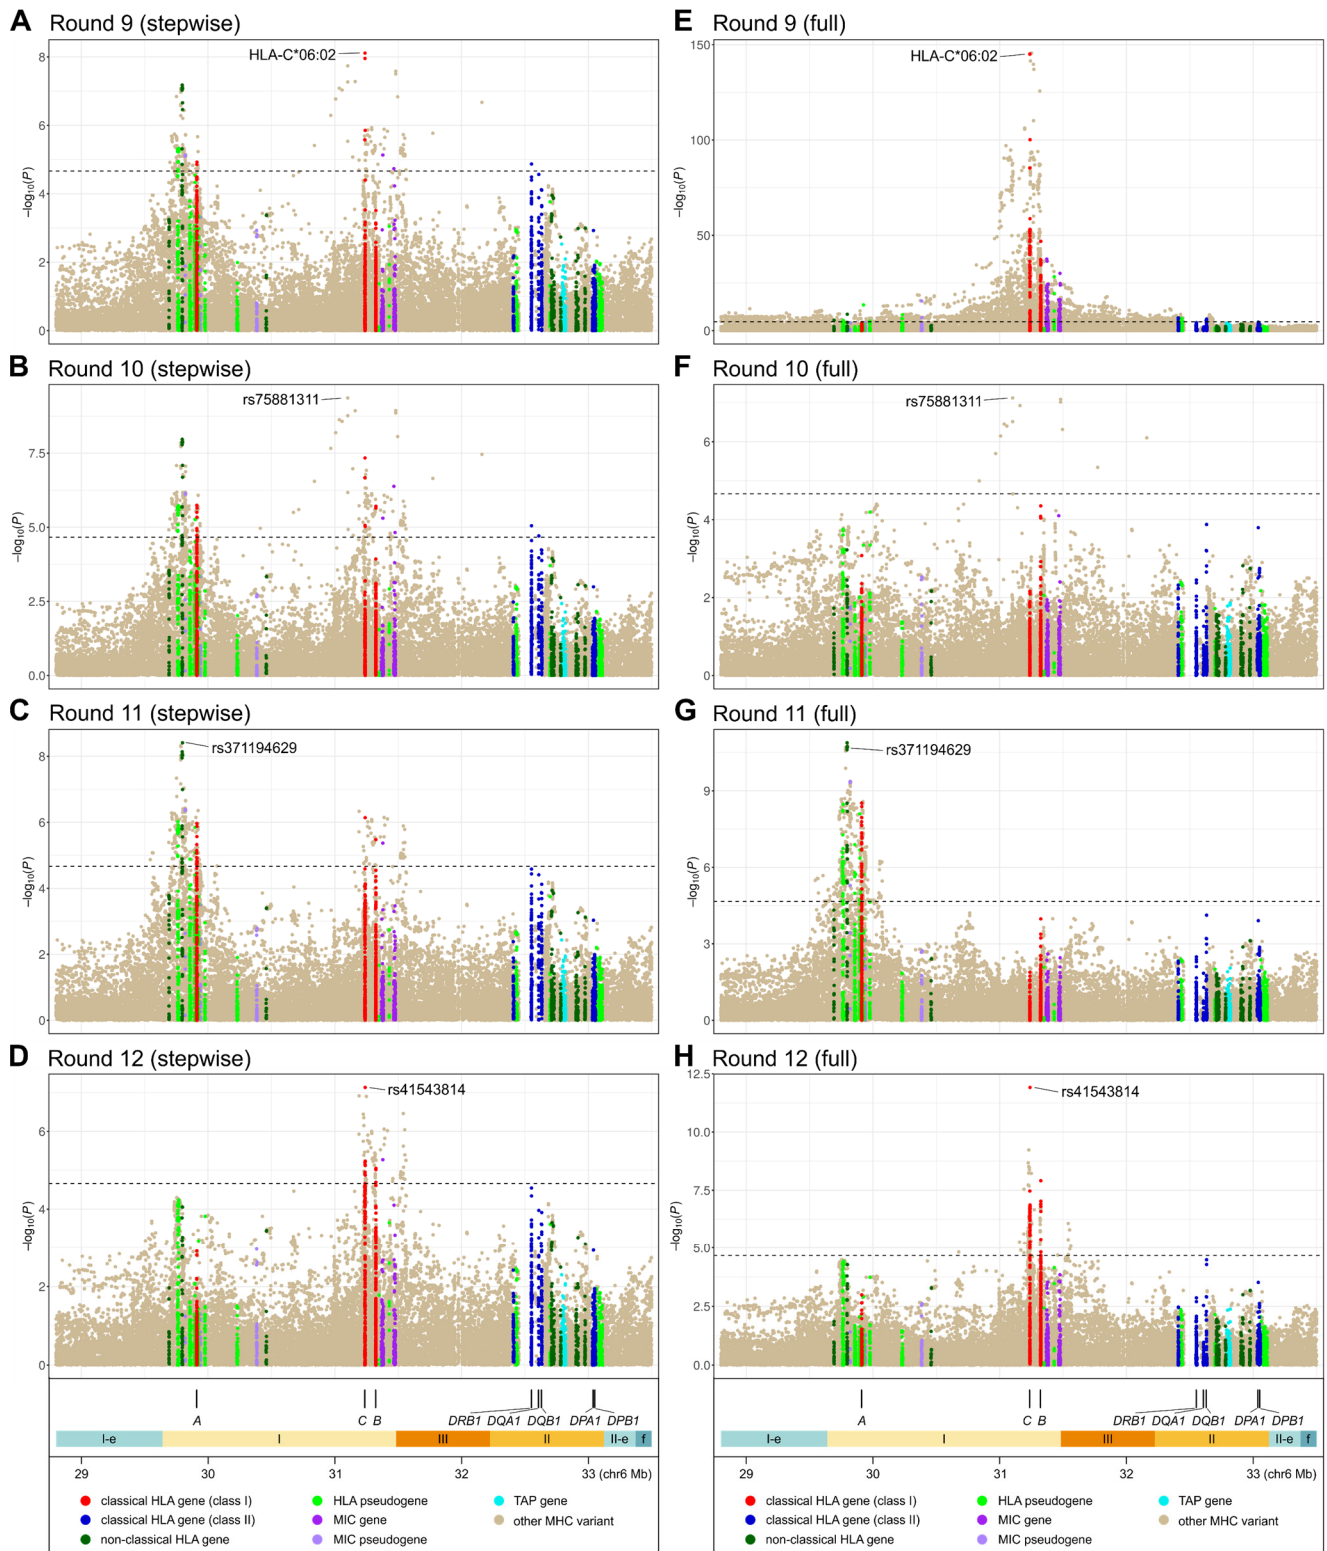

**Figure S28. Plots of rounds 9–12 of stepwise analysis of psoriasis association in the extended MHC region in people of European ancestry.** The left 4 panels (A–D) show association results after each stepwise round; the right 4 panels (E–H) show association results for the final full regression model containing all variants identified by the stepwise analysis except the one selected at that specific round. Each circle represents the  $-\log_{10}(P)$  of association of an imputed variant, color-coded based on its membership in various categories of MHC genes, as detailed in the key at the bottom. Dashed lines denote thresholds of Bonferroni-corrected significance of 0.05. The locations of the eight HLA genes for which amino acid and protein alleles were imputed are shown at the bottom, along with colored segments denoting the boundaries of the classical MHC region (class I, II and III), the extended MHC class I (I-e) and II (II-e) regions, and flanking MHC regions (f).

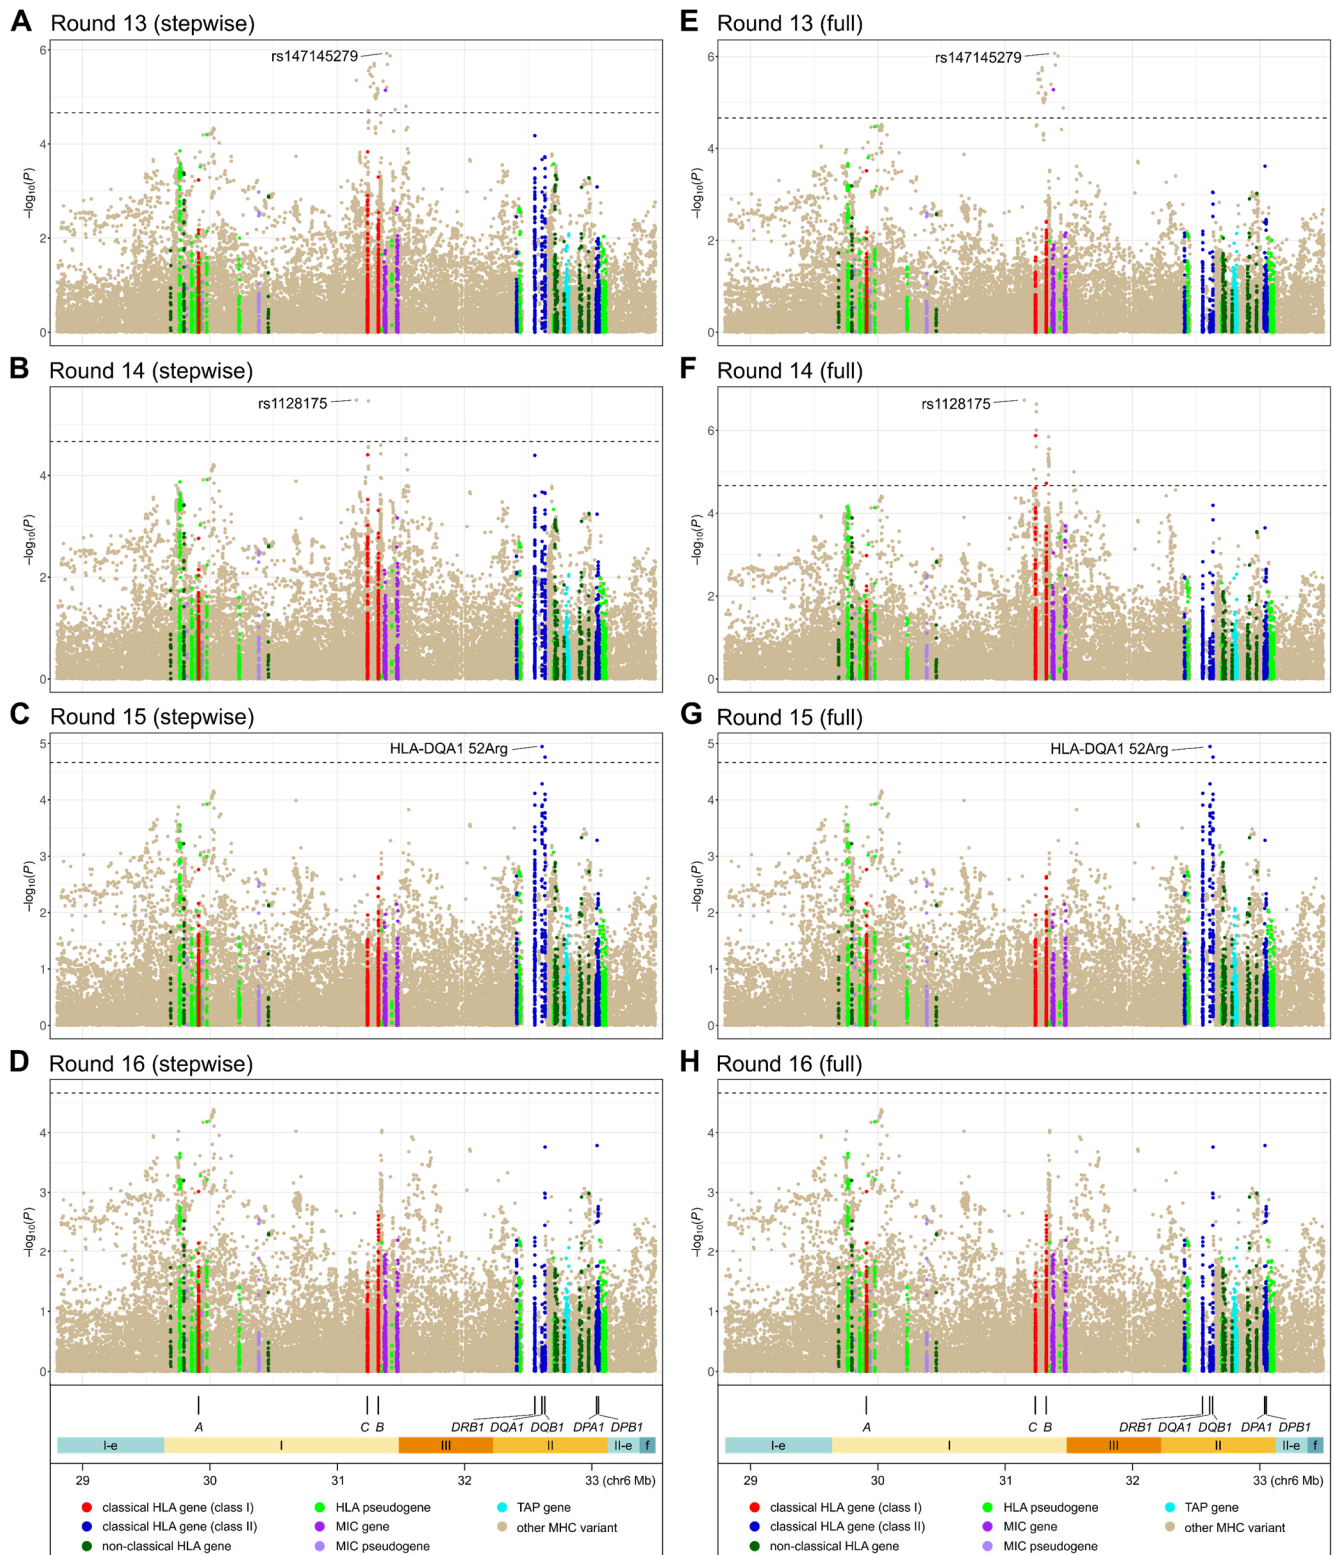

**Figure S29. Plots of rounds 13–16 of stepwise analysis of psoriasis association in the extended MHC region in people of European ancestry.** The left 4 panels (A–D) show association results after each stepwise round; the right 4 panels (E–H) show association results for the final full regression model containing all variants identified by the stepwise analysis except the one selected at that specific round. Each circle represents the  $-\log(p)$  of association of an imputed variant, color-coded based on its membership in various categories of MHC genes, as detailed in the key at the bottom. Dashed lines denote thresholds of Bonferroni-corrected significance of 0.05. The locations of the eight HLA genes for which amino acid and protein alleles were imputed are shown at the bottom, along with colored segments denoting the boundaries of the classical MHC region (class I, II and III), the extended MHC class I (I-e) and II (II-e) regions, and flanking MHC regions (f).

|                |                         | European model                           |                      |                      |                                                                 |      |      |                                                                                          |      |      |      |                        |                                    |      |                          |      |
|----------------|-------------------------|------------------------------------------|----------------------|----------------------|-----------------------------------------------------------------|------|------|------------------------------------------------------------------------------------------|------|------|------|------------------------|------------------------------------|------|--------------------------|------|
|                |                         | HLA-A                                    |                      | -                    | HLA-C                                                           |      |      | HLA-B                                                                                    |      |      |      | MICA                   | HLA-DRB1                           |      | HLA-DQA1                 |      |
|                |                         | rs371194629 (-,14mer)<br>rs1655901 (C,T) |                      | rs75881311 (T,other) | rs1128175 (A,G)<br>HLA-C*06:02 (6*02,other)<br>rs41543814 (C,T) |      |      | rs72866766 (C,T)<br>HLA-B aa-171 (H,Y)<br>HLA-B aa-67 (C,F,M,S,Y)<br>rs137854633 (-,C,T) |      |      |      | rs147145279 (AA,other) | rs6935999 (A,G)<br>rs4947340 (C,T) |      | HLA-DQA1 aa-52 (R,other) |      |
| European model | HLA-A                   | rs371194629 (-,14mer)                    | -                    | 0.00                 | 0.00                                                            | 0.03 | 0.01 | 0.03                                                                                     | 0.00 | 0.00 | 0.07 | 0.01                   | 0.00                               | 0.00 | 0.00                     | 0.01 |
|                |                         | rs1655901 (C,T)                          | 0.00                 | -                    | 0.00                                                            | 0.02 | 0.01 | 0.00                                                                                     | 0.01 | 0.01 | 0.05 | 0.00                   | 0.00                               | 0.01 | 0.00                     | 0.01 |
|                | -                       |                                          | rs75881311 (T,other) | 0.00                 | 0.00                                                            | -    | 0.02 | 0.00                                                                                     | 0.00 | 0.04 | 0.00 | 0.03                   | 0.00                               | 0.00 | 0.00                     | 0.00 |
|                | HLA-C                   |                                          | rs1128175 (A,G)      | 0.03                 | 0.02                                                            | 0.02 | -    | 0.04                                                                                     | 0.16 | 0.01 | 0.03 | 0.43                   | 0.02                               | 0.00 | 0.00                     | 0.03 |
|                |                         | HLA-C*06:02 (6*02,other)                 | 0.01                 | 0.01                 | 0.00                                                            | 0.04 | -    | 0.11                                                                                     | 0.01 | 0.02 | 0.37 | 0.26                   | 0.00                               | 0.00 | 0.07                     | 0.04 |
|                |                         | rs41543814 (C,T)                         | 0.03                 | 0.00                 | 0.00                                                            | 0.16 | 0.11 | -                                                                                        | 0.01 | 0.04 | 0.19 | 0.14                   | 0.00                               | 0.01 | 0.02                     | 0.01 |
|                | HLA-B                   |                                          | rs72866766 (C,T)     | 0.00                 | 0.01                                                            | 0.04 | 0.01 | 0.01                                                                                     | 0.01 | -    | 0.00 | 0.17                   | 0.02                               | 0.00 | 0.00                     | 0.00 |
|                |                         | HLA-B aa-171 (H,Y)                       | 0.00                 | 0.01                 | 0.00                                                            | 0.03 | 0.02 | 0.04                                                                                     | 0.00 | -    | 0.06 | 0.05                   | 0.00                               | 0.05 | 0.00                     | 0.00 |
|                | HLA-B aa-67 (C,F,M,S,Y) | 0.07                                     | 0.05                 | 0.03                 | 0.43                                                            | 0.37 | 0.19 | 0.17                                                                                     | 0.06 | -    | 0.18 | 0.01                   | 0.04                               | 0.12 | 0.08                     |      |
|                | rs137854633 (-,C,T)     | 0.01                                     | 0.00                 | 0.00                 | 0.02                                                            | 0.26 | 0.14 | 0.02                                                                                     | 0.05 | 0.18 | -    | 0.00                   | 0.00                               | 0.04 | 0.02                     |      |
| MICA           |                         | rs147145279 (AA,other)                   | 0.00                 | 0.00                 | 0.00                                                            | 0.00 | 0.00 | 0.00                                                                                     | 0.00 | 0.00 | 0.01 | 0.00                   | -                                  | 0.00 | 0.00                     |      |
| HLA-DRB1       |                         | rs6935999 (A,G)                          | 0.00                 | 0.01                 | 0.00                                                            | 0.00 | 0.00 | 0.01                                                                                     | 0.00 | 0.05 | 0.04 | 0.00                   | 0.00                               | -    | 0.01                     |      |
|                | rs4947340 (C,T)         | 0.00                                     | 0.00                 | 0.00                 | 0.03                                                            | 0.07 | 0.02 | 0.00                                                                                     | 0.00 | 0.12 | 0.04 | 0.00                   | 0.01                               | -    | 0.02                     |      |
| HLA-DQA1       |                         | HLA-DQA1 aa-52 (R,other)                 | 0.01                 | 0.01                 | 0.00                                                            | 0.02 | 0.04 | 0.01                                                                                     | 0.00 | 0.00 | 0.08 | 0.02                   | 0.00                               | 0.01 | 0.02                     |      |

**Figure S30. Pairwise linkage disequilibrium among variants of the European association model for the MHC region.** Variants are listed in the order of their position on chromosome 6, with the alleles used to compute LD in parentheses after each variant. LD values are for the multiallelic  $W_n^2$  coefficient computed in the European dataset, which reduces to the usual  $r^2$  coefficient when both variants of a pair are biallelic. The magnitude of LD values is accentuated with red shading on a 0 (white) to 1 (dark red) scale. Variants are labeled with a gene name if the variant changes that gene's protein sequence or if it is in substantial LD ( $W_n^2 \geq 0.4$ ) with a protein-changing variant for the gene. Variant ID rs147415279 is shorthand for a biallelic split of two biallelic indels (rs147415279 and rs559509014) that were genotyped as a single triallelic indel by the 1000 Genomes Project.

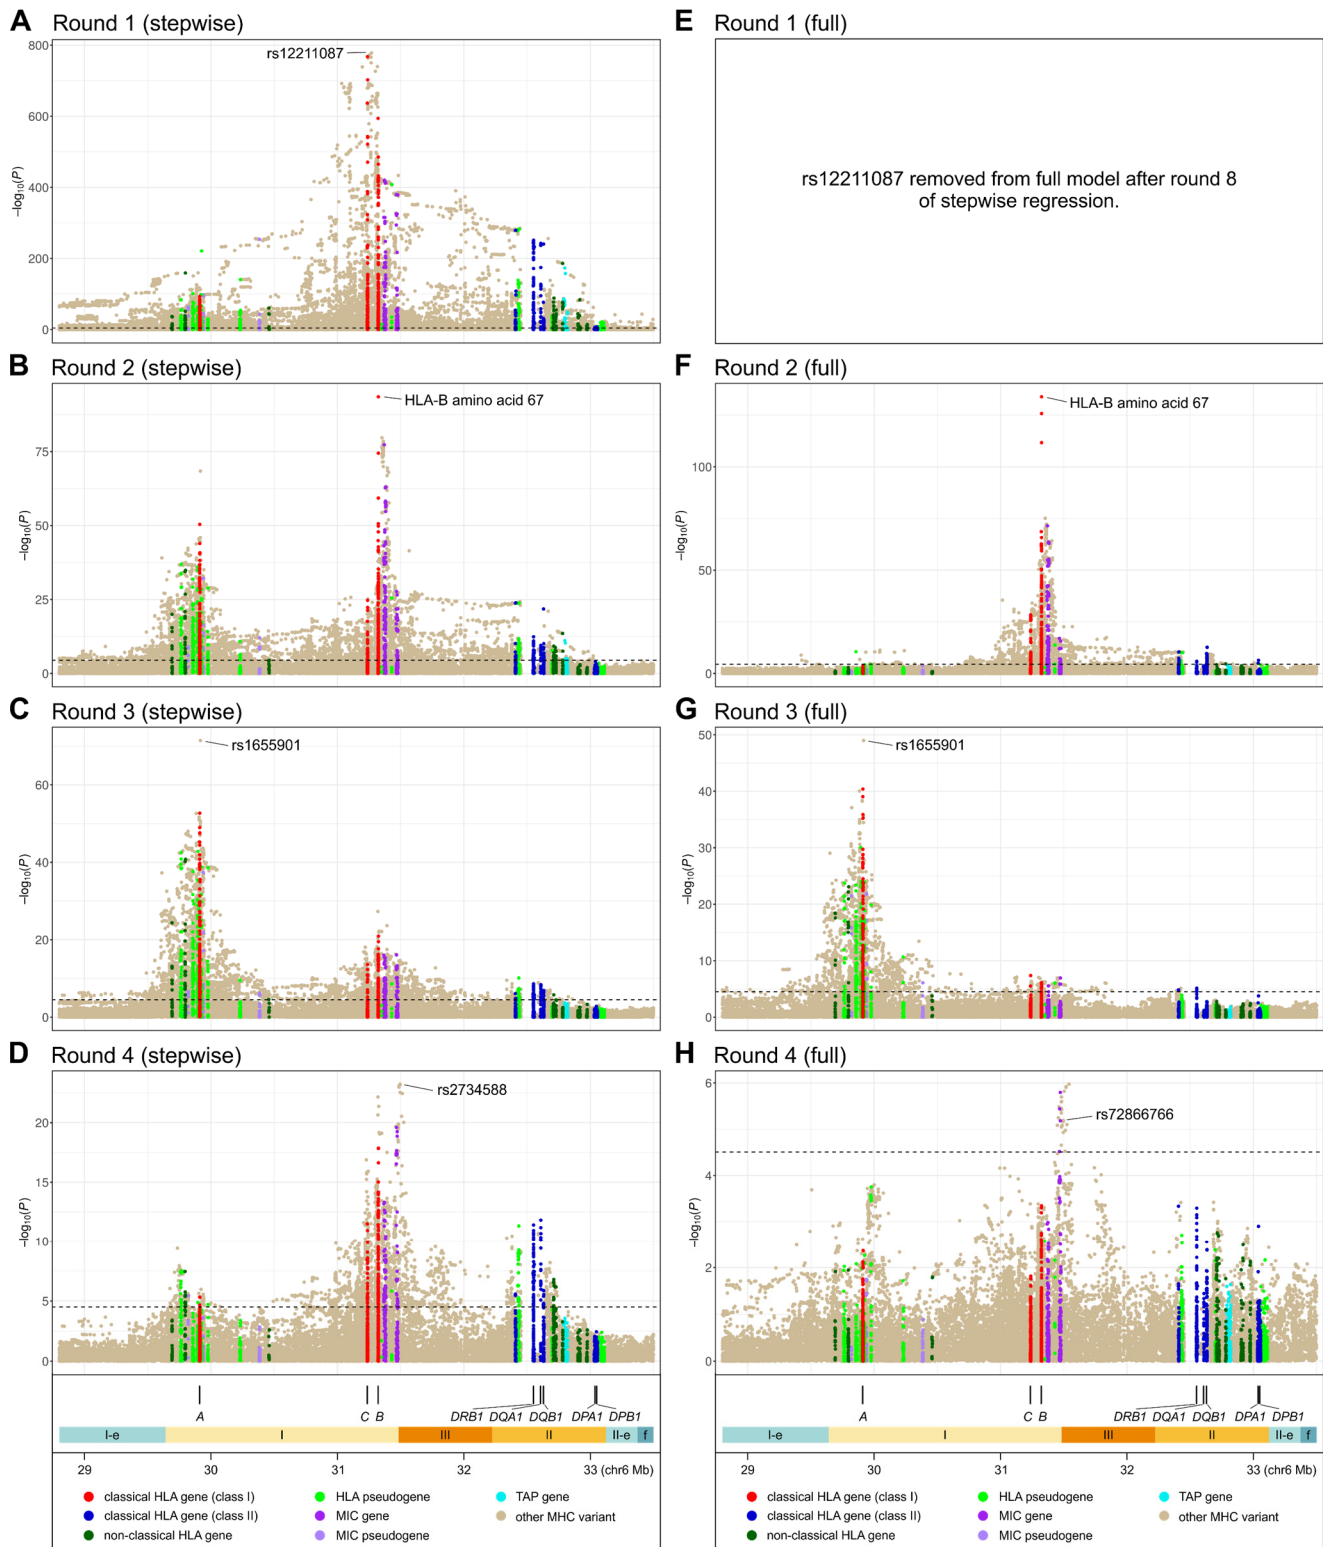

**Figure S31. Plots of rounds 1–4 of stepwise analysis of psoriasis association in the extended MHC region in people of South Asian or European ancestry.** The left 4 panels (A–D) show association results after each stepwise round; the right 4 panels (E–H) show association results for the final full regression model containing all variants identified by the stepwise analysis except the one selected at that specific round. Each circle represents the  $-\log_{10}(P)$  of association of an imputed variant, color-coded based on its membership in various categories of MHC genes, as detailed in the key at the bottom. Dashed lines denote thresholds of Bonferroni-corrected significance of 0.05. The locations of the eight HLA genes for which amino acid and protein alleles were imputed are shown at the bottom, along with colored segments denoting the boundaries of the classical MHC region (class I, II and III), the extended MHC class I (I-e) and II (II-e) regions, and flanking MHC regions (f).

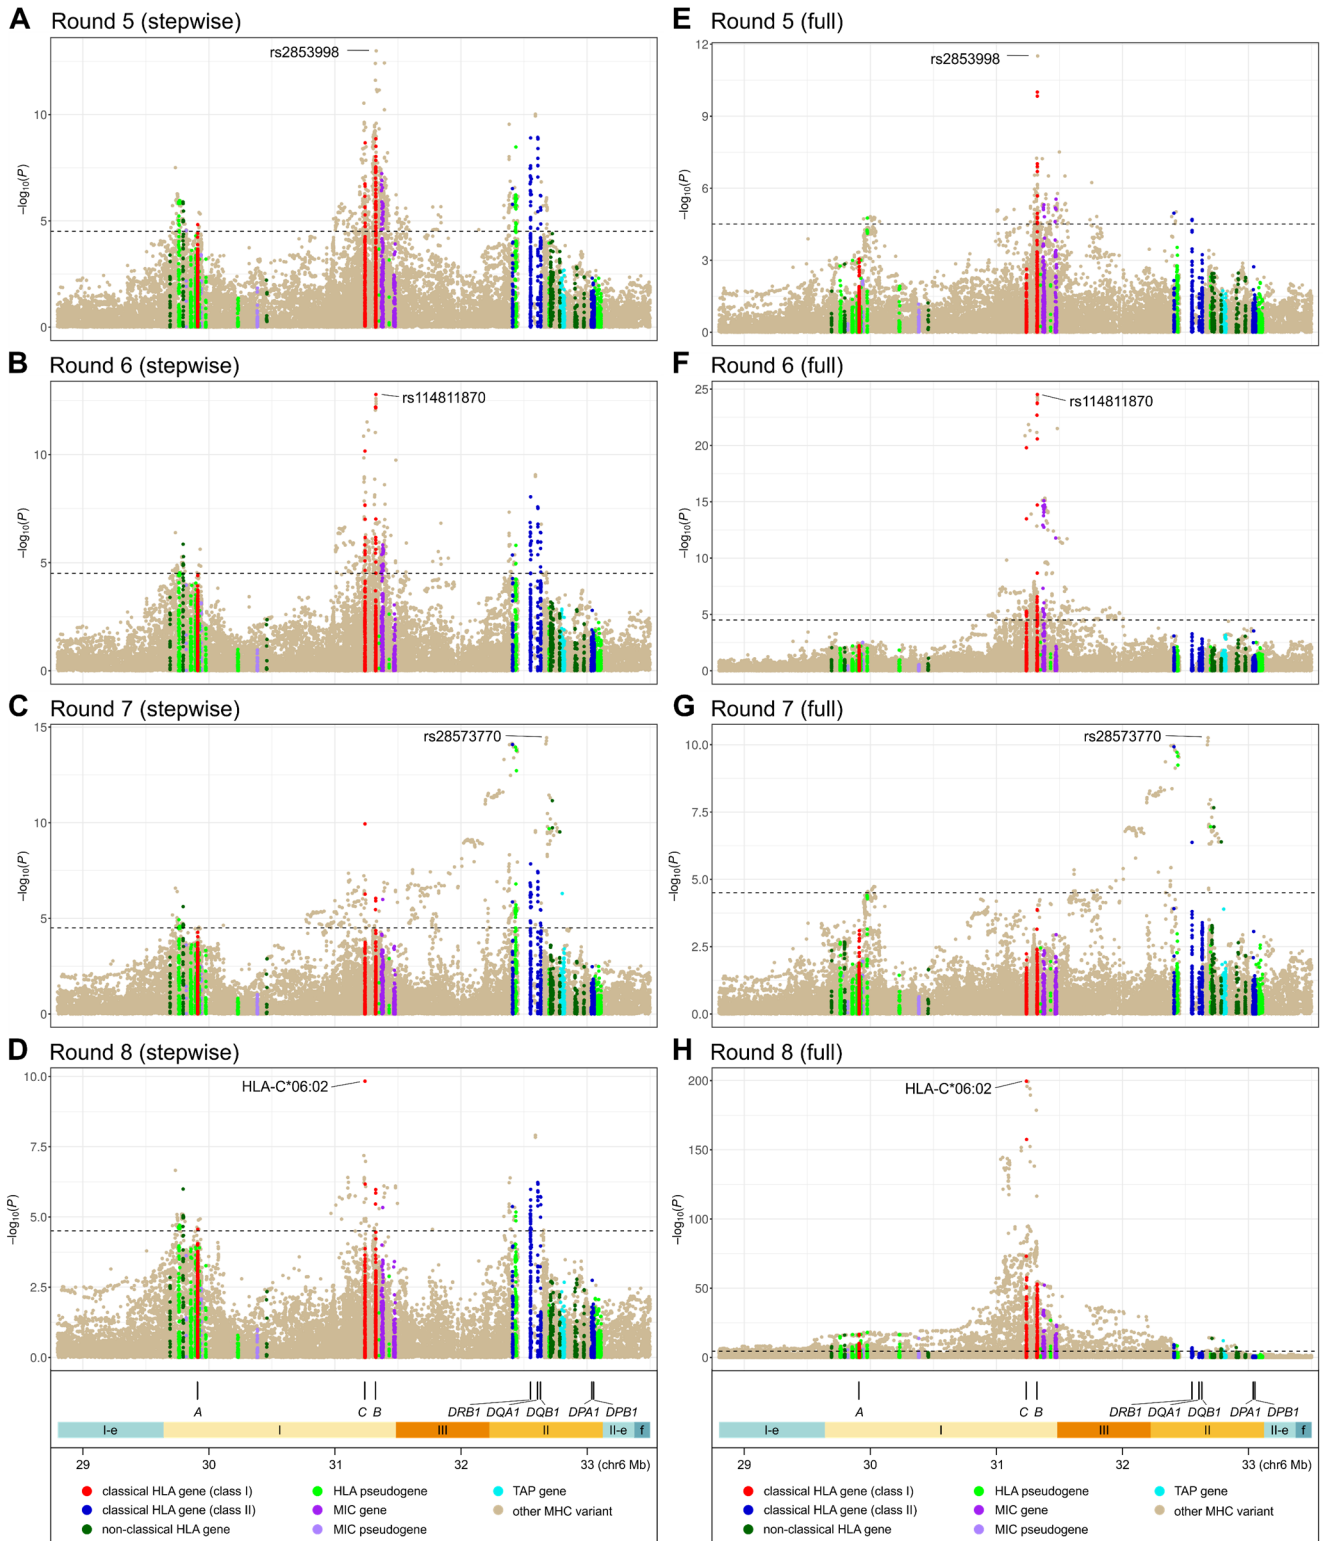

**Figure S32. Plots of rounds 5–8 of stepwise analysis of psoriasis association in the extended MHC region in people of South Asian or European ancestry.** The left 4 panels (A–D) show association results after each stepwise round; the right 4 panels (E–H) show association results for the final full regression model containing all variants identified by the stepwise analysis except the one selected at that specific round. Each circle represents the  $-\log_{10}(P)$  of association of an imputed variant, color-coded based on its membership in various categories of MHC genes, as detailed in the key at the bottom. Dashed lines denote thresholds of Bonferroni-corrected significance of 0.05. The locations of the eight HLA genes for which amino acid and protein alleles were imputed are shown at the bottom, along with colored segments denoting the boundaries of the classical MHC region (class I, II and III), the extended MHC class I (I-e) and II (II-e) regions, and flanking MHC regions (f).

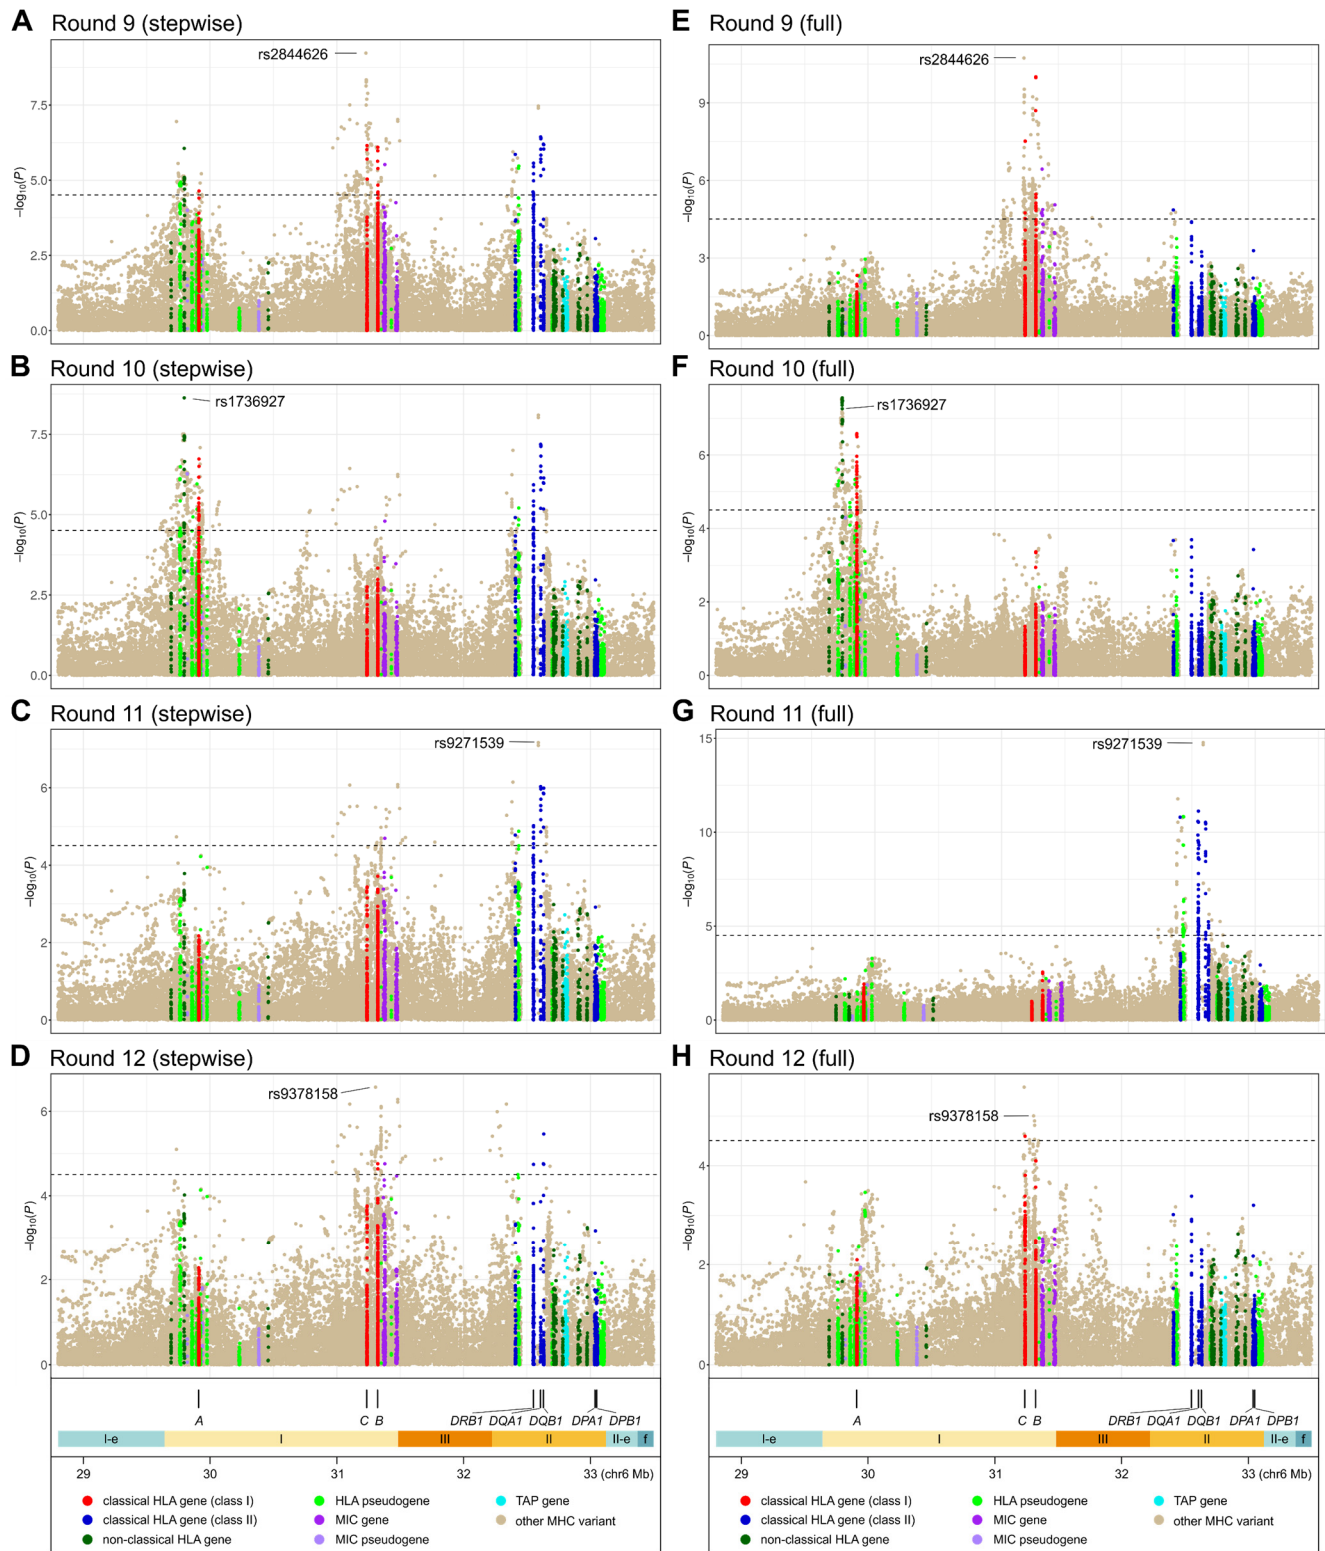

**Figure S33. Plots of rounds 9–12 of stepwise analysis of psoriasis association in the extended MHC region in people of South Asian or European ancestry.** The left 4 panels (A–D) show association results after each stepwise round; the right 4 panels (E–H) show association results for the final full regression model containing all variants identified by the stepwise analysis except the one selected at that specific round. Each circle represents the  $-\log_{10}(P)$  of association of an imputed variant, color-coded based on its membership in various categories of MHC genes, as detailed in the key at the bottom. Dashed lines denote thresholds of Bonferroni-corrected significance of 0.05. The locations of the eight HLA genes for which amino acid and protein alleles were imputed are shown at the bottom, along with colored segments denoting the boundaries of the classical MHC region (class I, II and III), the extended MHC class I (I-e) and II (II-e) regions, and flanking MHC regions (f).

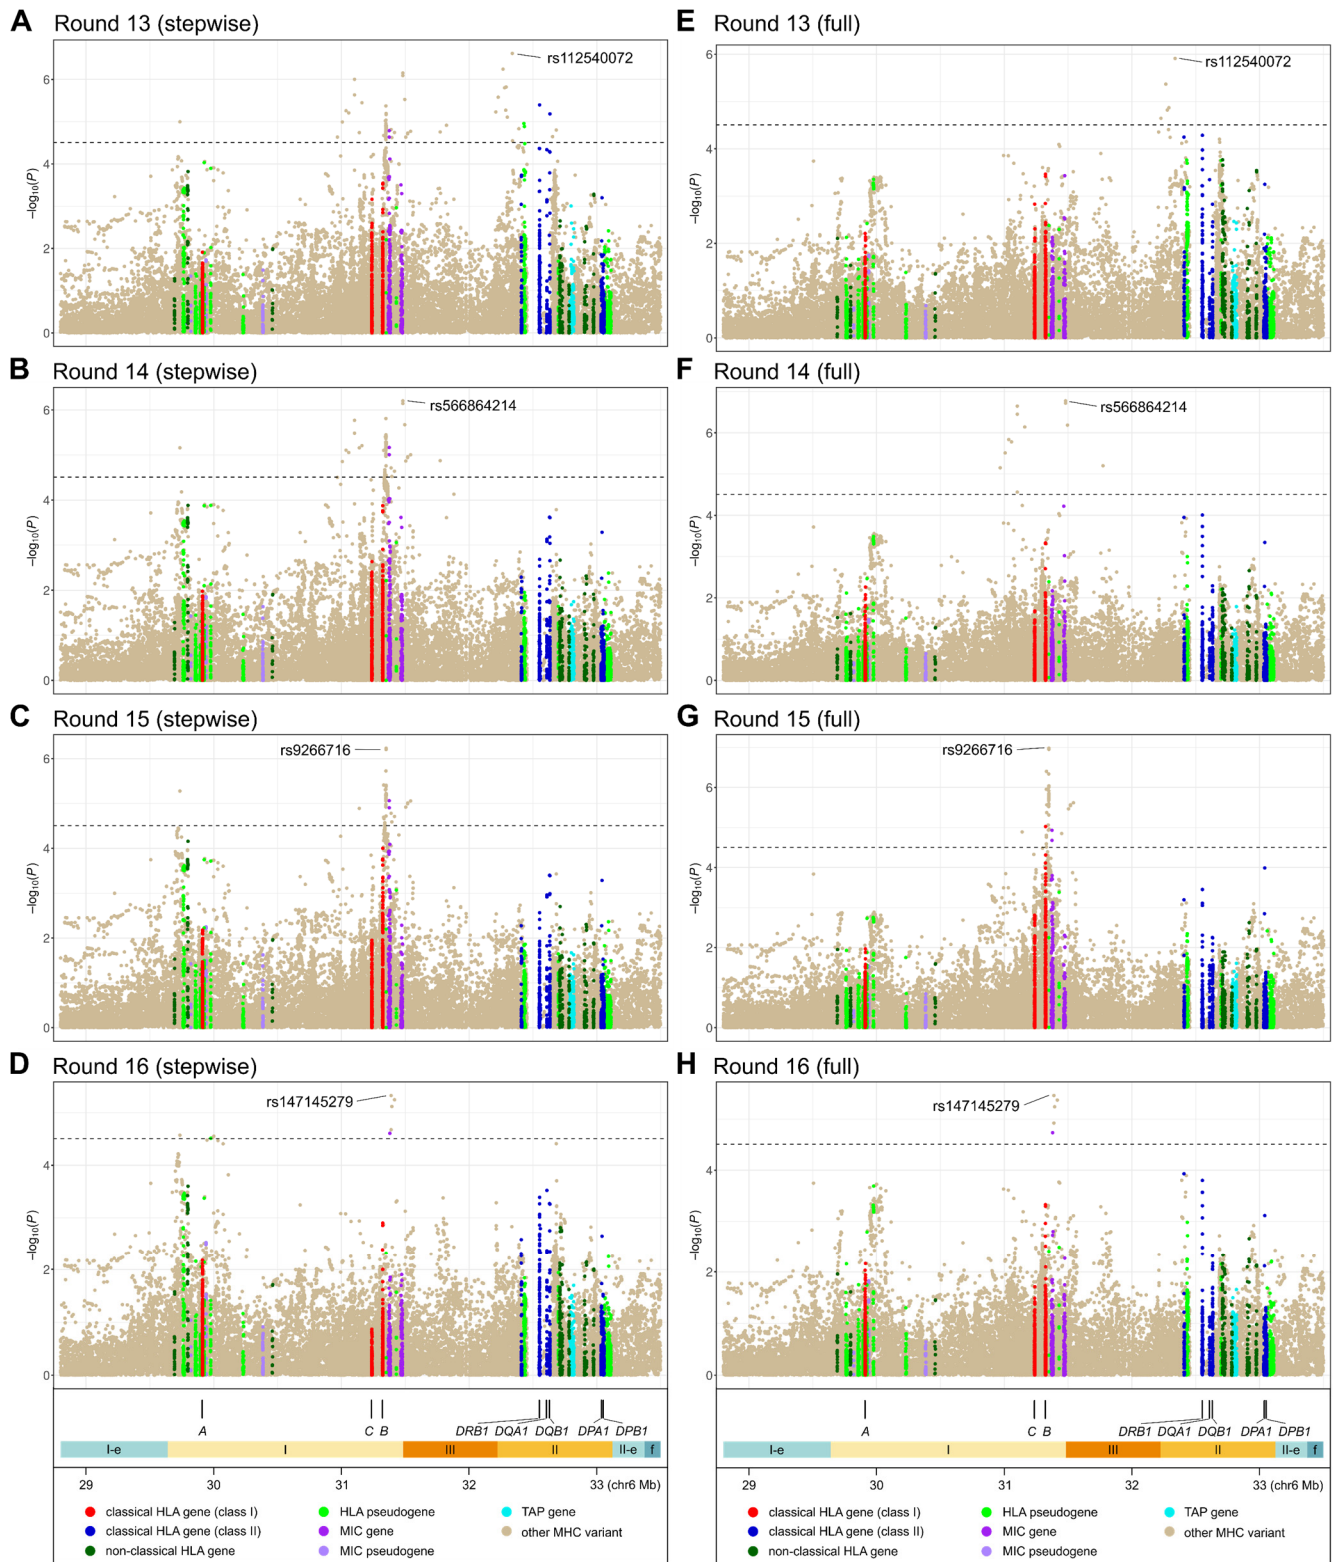

**Figure S34. Plots of rounds 13–16 of stepwise analysis of psoriasis association in the extended MHC region in people of South Asian or European ancestry.** The left 4 panels (A–D) show association results after each stepwise round; the right 4 panels (E–H) show association results for the final full regression model containing all variants identified by the stepwise analysis except the one selected at that specific round. Each circle represents the  $-\log(p)$  of association of an imputed variant, color-coded based on its membership in various categories of MHC genes, as detailed in the key at the bottom. Dashed lines denote thresholds of Bonferroni-corrected significance of 0.05. The locations of the eight HLA genes for which amino acid and protein alleles were imputed are shown at the bottom, along with colored segments denoting the boundaries of the classical MHC region (class I, II and III), the extended MHC class I (I-e) and II (II-e) regions, and flanking MHC regions (f).



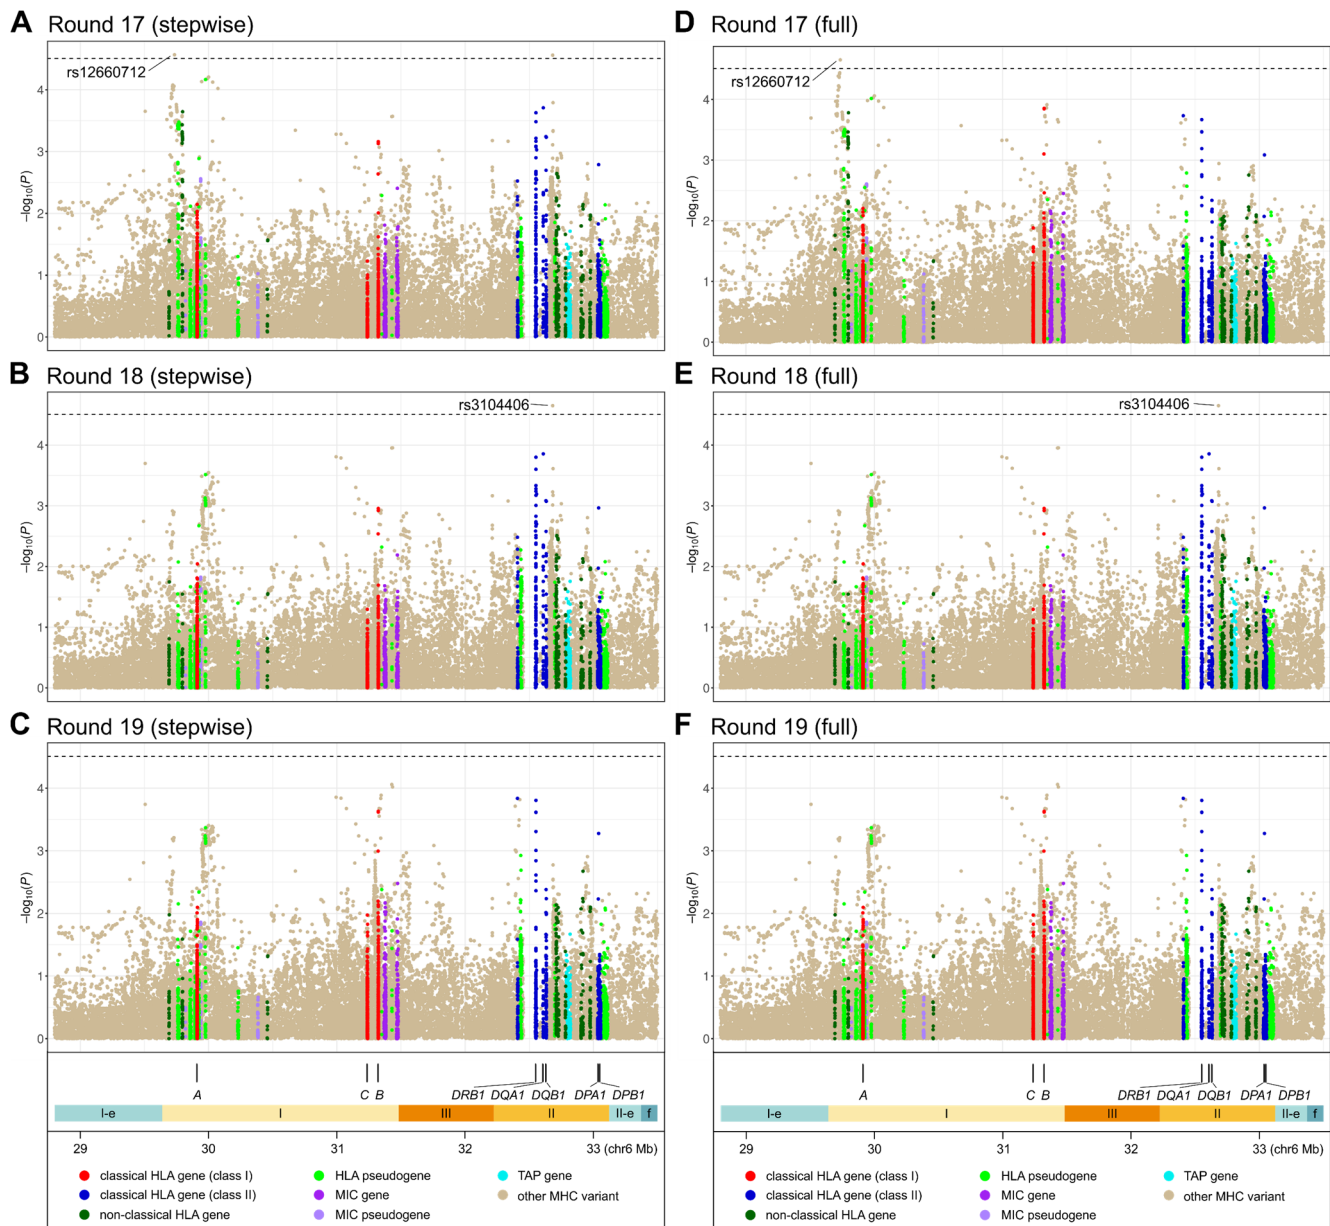

**Figure S35. Plots of rounds 17–19 of stepwise analysis of psoriasis association in the extended MHC region in people of South Asian or European ancestry.** The left 4 panels (A–D) show association results after each stepwise round; the right 4 panels (E–H) show association results for the final full regression model containing all variants identified by the stepwise analysis except the one selected at that specific round. Each circle represents the  $-\log(p)$  of association of an imputed variant, color-coded based on its membership in various categories of MHC genes, as detailed in the key at the bottom. Dashed lines denote thresholds of Bonferroni-corrected significance of 0.05. The locations of the eight HLA genes for which amino acid and protein alleles were imputed are shown at the bottom, along with colored segments denoting the boundaries of the classical MHC region (class I, II and III), the extended MHC class I (I-e) and II (II-e) regions, and flanking MHC regions (f).

|                                                                                                                     |                  | South Asian + European model |                 |                 |                 |                          |                 |                         |                   |                 |                 |                        |                   |                     |                   |                 |                  |                 |      |
|---------------------------------------------------------------------------------------------------------------------|------------------|------------------------------|-----------------|-----------------|-----------------|--------------------------|-----------------|-------------------------|-------------------|-----------------|-----------------|------------------------|-------------------|---------------------|-------------------|-----------------|------------------|-----------------|------|
|                                                                                                                     |                  | —                            | HLA-A           | CCHCR1          | HLA-C           | —                        | HLA-B           | —                       | HLA-B             | MICA            | —               | HLA-DRB1               | TAP2              | —                   |                   |                 |                  |                 |      |
| Linkage disequilibrium ( $W_n^2$ ) in South Asian dataset (upper triangular); in European dataset lower triangular) |                  | rs12660712 (A,C)             | rs1736927 (A,C) | rs1655901 (C,T) | rs2844626 (A,T) | HLA-C*06:02 (6*02,other) | rs9378158 (A,G) | HLA-B aa-67 (C,F,M,S,Y) | rs114811870 (C,T) | rs2853998 (C,T) | rs9266716 (C,T) | rs147415279 (AA,other) | rs566864214 (A,G) | rs2734588 (C,other) | rs112540072 (A,G) | rs9271539 (A,G) | rs28573770 (A,T) | rs3104406 (A,G) |      |
| South Asian + European model                                                                                        | —                | rs12660712 (A,C)             | —               | 0.02            | 0.08            | 0.01                     | 0.00            | 0.00                    | 0.02              | 0.00            | 0.00            | 0.11                   | 0.00              | 0.00                | 0.00              | 0.00            | 0.00             | 0.01            |      |
|                                                                                                                     | HLA-A            | rs1736927 (A,C)              | 0.03            | —               | 0.02            | 0.01                     | 0.02            | 0.00                    | 0.01              | 0.00            | 0.01            | 0.00                   | 0.00              | 0.00                | 0.00              | 0.00            | 0.00             | 0.00            | 0.00 |
|                                                                                                                     |                  | rs1655901 (C,T)              | 0.03            | 0.02            | —               | 0.03                     | 0.05            | 0.00                    | 0.04              | 0.00            | 0.00            | 0.05                   | 0.00              | 0.00                | 0.02              | 0.00            | 0.01             | 0.00            | 0.00 |
|                                                                                                                     | CCHCR1           | rs2844626 (A,T)              | 0.00            | 0.07            | 0.01            | —                        | 0.44            | 0.07                    | 0.14              | 0.00            | 0.03            | 0.01                   | 0.00              | 0.00                | 0.02              | 0.00            | 0.01             | 0.00            | 0.01 |
|                                                                                                                     | HLA-C            | HLA-C*06:02 (6*02,other)     | 0.00            | 0.00            | 0.01            | 0.24                     | —               | 0.03                    | 0.35              | 0.00            | 0.00            | 0.00                   | 0.00              | 0.00                | 0.01              | 0.03            | 0.00             | 0.01            |      |
|                                                                                                                     | —                | rs9378158 (A,G)              | 0.00            | 0.00            | 0.00            | 0.04                     | 0.01            | —                       | 0.06              | 0.00            | 0.01            | 0.01                   | 0.00              | 0.00                | 0.02              | 0.00            | 0.00             | 0.00            | 0.01 |
|                                                                                                                     | HLA-B            | HLA-B aa-67 (C,F,M,S,Y)      | 0.00            | 0.05            | 0.05            | 0.36                     | 0.37            | 0.03                    | —                 | 0.01            | 0.28            | 0.19                   | 0.00              | 0.01                | 0.07              | 0.02            | 0.07             | 0.01            | 0.02 |
|                                                                                                                     | —                | rs114811870 (C,T)            | 0.00            | 0.00            | 0.01            | 0.02                     | 0.01            | 0.00                    | 0.23              | —               | 0.00            | 0.00                   | 0.02              | 0.00                | 0.00              | 0.00            | 0.00             | 0.35            | 0.00 |
|                                                                                                                     | HLA-B            | rs2853998 (C,T)              | 0.01            | 0.01            | 0.01            | 0.13                     | 0.01            | 0.01                    | 0.33              | 0.02            | —               | 0.04                   | 0.00              | 0.00                | 0.01              | 0.00            | 0.01             | 0.00            | 0.01 |
|                                                                                                                     |                  | rs9266716 (C,T)              | 0.00            | 0.02            | 0.03            | 0.04                     | 0.01            | 0.00                    | 0.35              | 0.00            | 0.22            | —                      | 0.00              | 0.00                | 0.00              | 0.00            | 0.01             | 0.00            | 0.01 |
|                                                                                                                     | MICA             | rs147415279 (AA,other)       | 0.00            | 0.00            | 0.00            | 0.00                     | 0.00            | 0.01                    | 0.01              | 0.00            | 0.00            | 0.00                   | —                 | 0.00                | 0.00              | 0.00            | 0.00             | 0.01            | 0.00 |
|                                                                                                                     | —                | rs566864214 (A,G)            | 0.00            | 0.00            | 0.00            | 0.00                     | 0.00            | 0.00                    | 0.03              | 0.00            | 0.00            | 0.00                   | 0.00              | —                   | 0.00              | 0.00            | 0.00             | 0.00            | 0.00 |
|                                                                                                                     |                  | rs2734588 (C,other)          | 0.00            | 0.00            | 0.02            | 0.02                     | 0.02            | 0.00                    | 0.06              | 0.01            | 0.02            | 0.05                   | 0.00              | 0.00                | —                 | 0.00            | 0.00             | 0.00            | 0.00 |
|                                                                                                                     | HLA-DRB1         | rs112540072 (A,G)            | 0.00            | 0.00            | 0.00            | 0.00                     | 0.01            | 0.00                    | 0.02              | 0.00            | 0.00            | 0.00                   | 0.00              | 0.00                | 0.01              | —               | 0.01             | 0.00            | 0.03 |
|                                                                                                                     |                  | rs9271539 (A,G)              | 0.00            | 0.01            | 0.01            | 0.01                     | 0.03            | 0.01                    | 0.09              | 0.00            | 0.01            | 0.06                   | 0.00              | 0.00                | 0.01              | 0.03            | —                | 0.00            | 0.00 |
| TAP2                                                                                                                | rs28573770 (A,T) | 0.00                         | 0.00            | 0.01            | 0.00            | 0.00                     | 0.00            | 0.05                    | 0.21              | 0.00            | 0.00            | 0.00                   | 0.00              | 0.00                | 0.00              | 0.01            | —                | 0.00            |      |
| —                                                                                                                   | rs3104406 (A,G)  | 0.00                         | 0.00            | 0.00            | 0.00            | 0.07                     | 0.00            | 0.12                    | 0.01              | 0.02            | 0.00            | 0.00                   | 0.00              | 0.05                | 0.03              | 0.00            | 0.01             | —               |      |

**Figure S36. Pairwise linkage disequilibrium among variants of the transethnic association model for the MHC region.** Variants are listed in the order of their position on chromosome 6, with the alleles used to compute LD in parentheses after each variant. LD values on the upper and lower triangular are for the multiallelic  $W_n^2$  coefficient computed in the South Asian and European datasets, respectively, which reduces to the usual  $r^2$  coefficient when both variants of a pair are biallelic. The magnitude of LD values is accentuated with red shading on a 0 (white) to 1 (dark red) scale. Variants are labeled with a gene name if the variant changes that gene's protein sequence or if it is in substantial LD ( $W_n^2 \geq 0.4$ ) with a protein-changing variant for the gene. Variant ID rs147415279 is shorthand for a biallelic split of two biallelic indels (rs147415279 and rs559509014) that were genotyped as a single triallelic indel by the 1000 Genomes Project.

|                   |          | European model                           |                      |                 |                          |                  |                  |                    |                         |                     |                        |                 |                 |                         |          |      |                                      |
|-------------------|----------|------------------------------------------|----------------------|-----------------|--------------------------|------------------|------------------|--------------------|-------------------------|---------------------|------------------------|-----------------|-----------------|-------------------------|----------|------|--------------------------------------|
|                   |          | HLA-A                                    |                      |                 | HLA-C                    |                  |                  | HLA-B              |                         |                     |                        | MICA            | HLA-DRB1        |                         | HLA-DQA1 |      |                                      |
|                   |          | rs371194629 (-,14mer)<br>rs1655901 (C,T) | rs75881311 (T,other) | rs1128175 (A,G) | HLA-C*06:02 (6*02,other) | rs41543814 (C,T) | rs72866766 (C,T) | HLA-B aa-171 (H,Y) | HLA-B aa-67 (C,F,M,S,Y) | rs137854633 (-,C,T) | rs147415279 (AA,other) | rs6935999 (A,G) | rs4947340 (C,T) | HLA-DQA1 aa52 (R,other) |          |      |                                      |
| South Asian model | HLA-A    | rs9260313 (C,T)                          | 0.05                 | 0.70            | 0.00                     | 0.00             | 0.06             | 0.00               | 0.00                    | 0.00                | 0.02                   | 0.01            | 0.00            | 0.00                    | 0.00     | 0.01 | LD ( $W_n^2$ )<br>in South<br>Asians |
|                   | HLA-C    | HLA-C*06 (C*06,other)                    | 0.08                 | 0.05            | 0.00                     | 0.07             | 1.00             | 0.13               | 0.02                    | 0.06                | 0.35                   | 0.21            | 0.00            | 0.00                    | 0.06     | 0.02 |                                      |
|                   | —        | rs2442752 (C,T)                          | 0.03                 | 0.02            | 0.00                     | 0.03             | 0.10             | 0.00               | 0.04                    | 0.14                | 0.17                   | 0.11            | 0.00            | 0.00                    | 0.02     | 0.02 |                                      |
|                   | MICA     | rs2428489 (A,C,T)                        | 0.01                 | 0.03            | 0.00                     | 0.02             | 0.08             | 0.06               | 0.03                    | 0.16                | 0.29                   | 0.04            | 0.00            | 0.00                    | 0.06     | 0.00 |                                      |
|                   | HLA-DRB1 | rs139451799 (-,other)                    | 0.01                 | 0.00            | 0.00                     | 0.01             | 0.04             | 0.01               | 0.00                    | 0.01                | 0.05                   | 0.01            | 0.00            | 0.00                    | 0.00     | 0.10 |                                      |
| South Asian model | HLA-A    | rs9260313 (C,T)                          | 0.03                 | 0.49            | 0.00                     | 0.01             | 0.01             | 0.01               | 0.02                    | 0.01                | 0.04                   | 0.01            | 0.00            | 0.01                    | 0.00     | 0.00 | LD ( $W_n^2$ )<br>in Euro-<br>peans  |
|                   | HLA-C    | HLA-C*06 (C*06,other)                    | 0.01                 | 0.01            | 0.00                     | 0.05             | 1.00             | 0.11               | 0.01                    | 0.02                | 0.37                   | 0.26            | 0.00            | 0.00                    | 0.07     | 0.04 |                                      |
|                   | —        | rs2442752 (C,T)                          | 0.01                 | 0.01            | 0.00                     | 0.00             | 0.04             | 0.01               | 0.04                    | 0.08                | 0.36                   | 0.06            | 0.00            | 0.00                    | 0.01     | 0.03 |                                      |
|                   | MICA     | rs2428489 (A,C,T)                        | 0.01                 | 0.03            | 0.01                     | 0.02             | 0.03             | 0.00               | 0.11                    | 0.02                | 0.32                   | 0.02            | 0.00            | 0.02                    | 0.04     | 0.03 |                                      |
|                   | HLA-DRB1 | rs139451799 (-,other)                    | 0.01                 | 0.00            | 0.00                     | 0.08             | 0.01             | 0.01               | 0.00                    | 0.00                | 0.15                   | 0.01            | 0.00            | 0.00                    | 0.09     | 0.11 |                                      |

**Figure S37. Pairwise linkage disequilibrium between variants of the South Asian and European association models for the MHC region.**

Variants are listed in the order of their position on chromosome 6, with the alleles used to compute LD in parentheses after each variant. LD values for the top five rows and bottom five rows are the multiallelic  $W_n^2$  coefficient computed in the South Asian and European datasets, respectively, which reduces to the usual  $r^2$  coefficient when both variants of a pair are biallelic. The magnitude of LD values is accentuated with red shading on a 0 (white) to 1 (dark red) scale. Variants are labeled with a gene name if the variant changes that gene's protein sequence or if it is in substantial LD ( $W_n^2 \geq 0.4$ ) with a protein-changing variant for the gene. Variant ID rs147415279 is shorthand for a biallelic split of two biallelic indels (rs147415279 and rs559509014) that were genotyped as a single triallelic indel by the 1000 Genomes Project.

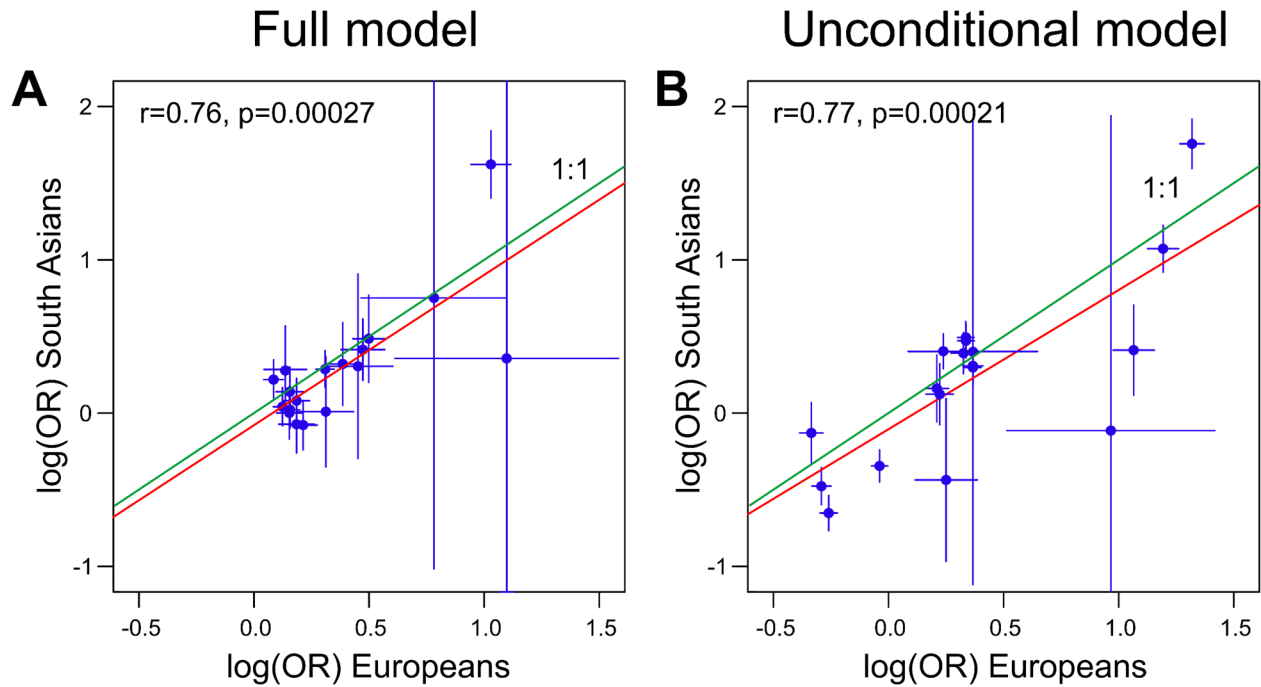

**Figure S38. Plots comparing association effect sizes in South Asians vs. Europeans for all variants in the European regression model for the MHC region.** The log(OR) of each of the 14 variants in the European model as estimated in the South Asian dataset is plotted against their estimates in the European dataset. The vertical and horizontal bars show the 95% confidence intervals for these estimates in each dataset. Multiallelic variants with  $m$  alleles are represented by the set of  $m-1$  decomposed biallelic variants used for the joint Wald test. Panel A shows OR estimates estimated in the full model containing all variants, and panel B shows unconditional OR estimates for each variant with no other variants in the regression model. Green and red lines depict a 1:1 correspondence and a linear fit, respectively. The Pearson correlation coefficient and its significance are shown in the upper left corner of each plot.

| Linkage disequilibrium ( $W_n^2$ ) in South Asian dataset |          |                       | South Asian + European model |                 |                 |                 |                          |                 |                         |                   |                 |                 |                        |                   |                     |                   |                 |                  |                 |
|-----------------------------------------------------------|----------|-----------------------|------------------------------|-----------------|-----------------|-----------------|--------------------------|-----------------|-------------------------|-------------------|-----------------|-----------------|------------------------|-------------------|---------------------|-------------------|-----------------|------------------|-----------------|
|                                                           |          |                       | —                            | HLA-A           | CCHCR1          | HLA-C           | —                        | HLA-B           | —                       | HLA-B             | MICA            | —               | —                      | HLA-DRB1          | TAP2                | —                 |                 |                  |                 |
|                                                           |          |                       | rs12660712 (A,C)             | rs1736927 (A,C) | rs1655901 (C,T) | rs2844626 (A,T) | HLA-C*06:J2 (6*02,other) | rs9378158 (A,G) | HLA-B aa-67 (C,F,M,S,Y) | rs114811870 (C,T) | rs2853998 (C,T) | rs9266716 (C,T) | rs147415279 (AA,other) | rs566864214 (A,G) | rs2734588 (C,other) | rs112540072 (A,G) | rs9271539 (A,G) | rs28573770 (A,T) | rs3104406 (A,G) |
| South Asian model                                         | HLA-A    | rs9260313 (C,T)       | 0.11                         | 0.12            | 0.70            | 0.05            | 0.06                     | 0.00            | 0.02                    | 0.00              | 0.00            | 0.02            | 0.00                   | 0.00              | 0.00                | 0.00              | 0.01            | 0.00             | 0.00            |
|                                                           | HLA-C    | HLA-C*06 (C*06,other) | 0.00                         | 0.02            | 0.05            | 0.44            | 1.00                     | 0.03            | 0.35                    | 0.00              | 0.00            | 0.00            | 0.00                   | 0.00              | 0.00                | 0.01              | 0.03            | 0.00             | 0.01            |
|                                                           | —        | rs2442752 (C,T)       | 0.03                         | 0.00            | 0.02            | 0.00            | 0.10                     | 0.05            | 0.17                    | 0.00              | 0.01            | 0.02            | 0.00                   | 0.00              | 0.00                | 0.00              | 0.04            | 0.00             | 0.00            |
|                                                           | MICA     | rs2428489 (A,C,T)     | 0.22                         | 0.01            | 0.03            | 0.23            | 0.08                     | 0.01            | 0.29                    | 0.00              | 0.15            | 0.51            | 0.00                   | 0.00              | 0.02                | 0.01              | 0.01            | 0.00             | 0.03            |
|                                                           | HLA-DRB1 | rs139451799 (—,other) | 0.00                         | 0.01            | 0.00            | 0.01            | 0.04                     | 0.00            | 0.05                    | 0.00              | 0.02            | 0.01            | 0.00                   | 0.00              | 0.01                | 0.01              | 0.09            | 0.00             | 0.11            |

**Figure S39. Pairwise linkage disequilibrium between variants of the South Asian and transethnic association models for the MHC region.**

Variants are listed in the order of their position on chromosome 6, with the alleles used to compute LD in parentheses after each variant. LD values are for the multiallelic  $W_n^2$  coefficient computed in the South Asian dataset, which reduces to the usual  $r^2$  coefficient when both variants of a pair are biallelic. The magnitude of LD values is accentuated with red shading on a 0 (white) to 1 (dark red) scale. Variants are labeled with a gene name if the variant changes that gene's protein sequence or if it is in substantial LD ( $W_n^2 \geq 0.4$ ) with a protein-changing variant for the gene. Variant ID rs147415279 is shorthand for a biallelic split of two biallelic indels (rs147415279 and rs559509014) that were genotyped as a single triallelic indel by the 1000 Genomes Project.

| Linkage disequilibrium ( $W_n^2$ ) in European dataset |                          |                          | South Asian + European model |                                    |                 |                          |                 |                         |                   |                 |                 |                        |                   |                     |                   |                 |                  |                 |             |
|--------------------------------------------------------|--------------------------|--------------------------|------------------------------|------------------------------------|-----------------|--------------------------|-----------------|-------------------------|-------------------|-----------------|-----------------|------------------------|-------------------|---------------------|-------------------|-----------------|------------------|-----------------|-------------|
|                                                        |                          |                          | —                            | HLA-A                              | CCHCR1          | HLA-C                    | —               | HLA-B                   | —                 | HLA-B           | MICA            | —                      | —                 | HLA-DRB1            | TAP2              | —               |                  |                 |             |
|                                                        |                          |                          | rs12660712 (A,C)             | rs1736927 (A,C)<br>rs1655901 (C,T) | rs2844626 (A,T) | HLA-C*06:02 (6*02,other) | rs9378158 (A,G) | HLA-B aa-67 (C,F,M,S,Y) | rs114811870 (C,T) | rs2853998 (C,T) | rs9266716 (C,T) | rs147415279 (AA,other) | rs566864214 (A,G) | rs2734588 (C,other) | rs112540072 (A,G) | rs9271539 (A,G) | rs28573770 (A,T) | rs3104406 (A,G) |             |
| European model                                         | HLA-A                    | rs371194629 (–,14mer)    | 0.03                         | <b>0.73</b>                        | 0.00            | 0.07                     | 0.01            | 0.00                    | 0.07              | 0.00            | 0.01            | 0.03                   | 0.00              | 0.00                | 0.00              | 0.00            | 0.01             | 0.00            | 0.00        |
|                                                        | —                        | rs1655901 (C,T)          | 0.03                         | 0.02                               | –               | 0.01                     | 0.01            | 0.00                    | 0.05              | 0.01            | 0.01            | 0.03                   | 0.00              | 0.00                | 0.02              | 0.00            | 0.01             | 0.01            | 0.00        |
|                                                        | —                        | rs75881311 (T,other)     | 0.00                         | 0.00                               | 0.00            | 0.00                     | 0.00            | 0.00                    | 0.03              | 0.00            | 0.00            | 0.00                   | 0.00              | <b>0.55</b>         | 0.00              | 0.00            | 0.00             | 0.00            | 0.00        |
|                                                        | HLA-C                    | rs1128175 (A,G)          | 0.00                         | 0.02                               | 0.02            | 0.00                     | 0.04            | 0.02                    | <b>0.43</b>       | 0.01            | 0.06            | 0.09                   | 0.00              | 0.01                | 0.03              | 0.03            | 0.02             | 0.00            | 0.05        |
|                                                        | —                        | HLA-C*06:02 (6*02,other) | 0.00                         | 0.00                               | 0.01            | <b>0.24</b>              | –               | 0.01                    | <b>0.37</b>       | 0.01            | 0.01            | 0.01                   | 0.00              | 0.00                | 0.02              | 0.01            | 0.03             | 0.00            | 0.07        |
|                                                        | —                        | rs41543814 (C,T)         | 0.00                         | 0.03                               | 0.00            | <b>0.43</b>              | 0.11            | 0.01                    | <b>0.19</b>       | 0.05            | 0.00            | 0.01                   | 0.00              | 0.00                | 0.00              | 0.00            | 0.00             | 0.01            | 0.00        |
|                                                        | HLA-B                    | rs72866766 (C,T)         | 0.00                         | 0.01                               | 0.01            | 0.01                     | 0.01            | 0.01                    | 0.17              | 0.00            | 0.01            | 0.04                   | 0.00              | 0.03                | 0.10              | 0.00            | 0.00             | 0.00            | 0.00        |
|                                                        | —                        | HLA-B aa-171 (H,Y)       | 0.00                         | 0.00                               | 0.01            | 0.03                     | 0.02            | 0.02                    | 0.06              | <b>0.24</b>     | 0.00            | 0.03                   | 0.00              | 0.00                | 0.00              | 0.00            | 0.00             | 0.05            | 0.01        |
|                                                        | —                        | HLA-B aa-67 (C,F,M,S,Y)  | 0.00                         | 0.05                               | 0.05            | <b>0.36</b>              | <b>0.37</b>     | 0.03                    | –                 | <b>0.23</b>     | <b>0.33</b>     | <b>0.35</b>            | 0.01              | 0.03                | 0.06              | 0.02            | 0.09             | 0.05            | <b>0.12</b> |
|                                                        | —                        | rs137854633 (–,C,T)      | 0.00                         | 0.01                               | 0.00            | 0.07                     | <b>0.26</b>     | 0.01                    | <b>0.18</b>       | 0.03            | 0.06            | 0.13                   | 0.00              | 0.00                | <b>0.21</b>       | 0.02            | 0.01             | 0.01            | 0.04        |
| MICA                                                   | rs147415279 (AA,other)   | 0.00                     | 0.00                         | 0.00                               | 0.00            | 0.00                     | 0.01            | 0.01                    | 0.00              | 0.00            | 0.00            | –                      | 0.00              | 0.00                | 0.00              | 0.00            | 0.00             | 0.00            |             |
| HLA-DRB1                                               | rs6935999 (A,G)          | 0.00                     | 0.00                         | 0.01                               | 0.00            | 0.00                     | 0.00            | 0.04                    | <b>0.18</b>       | 0.00            | 0.00            | 0.00                   | 0.00              | 0.00                | 0.00              | 0.01            | <b>0.81</b>      | 0.01            |             |
| —                                                      | rs4947340 (C,T)          | 0.00                     | 0.00                         | 0.00                               | 0.00            | 0.07                     | 0.00            | 0.12                    | 0.01              | 0.02            | 0.01            | 0.00                   | 0.00              | 0.02                | 0.02              | <b>0.24</b>     | 0.02             | <b>0.12</b>     |             |
| DQA1                                                   | HLA-DQA1 aa-52 (R,other) | 0.00                     | 0.00                         | 0.01                               | 0.00            | 0.04                     | 0.00            | 0.08                    | 0.01              | 0.00            | 0.06            | 0.00                   | 0.00              | 0.02                | 0.02              | 0.13            | 0.01             | 0.01            |             |

**Figure S40. Pairwise linkage disequilibrium between variants of the European and transethnic association models for the MHC region.**

Variants are listed in the order of their position on chromosome 6, with the alleles used to compute LD in parentheses after each variant. LD values are for the multiallelic  $W_n^2$  coefficient computed in the European dataset, which reduces to the usual  $r^2$  coefficient when both variants of a pair are biallelic. The magnitude of LD values is accentuated with red shading on a 0 (white) to 1 (dark red) scale. Variants are labeled with a gene name if the variant changes that gene's protein sequence or if it is in substantial LD ( $W_n^2 \geq 0.4$ ) with a protein-changing variant for the gene. Variant ID rs147415279 is shorthand for a biallelic split of two biallelic indels (rs147415279 and rs559509014) that were genotyped as a single triallelic indel by the 1000 Genomes Project.

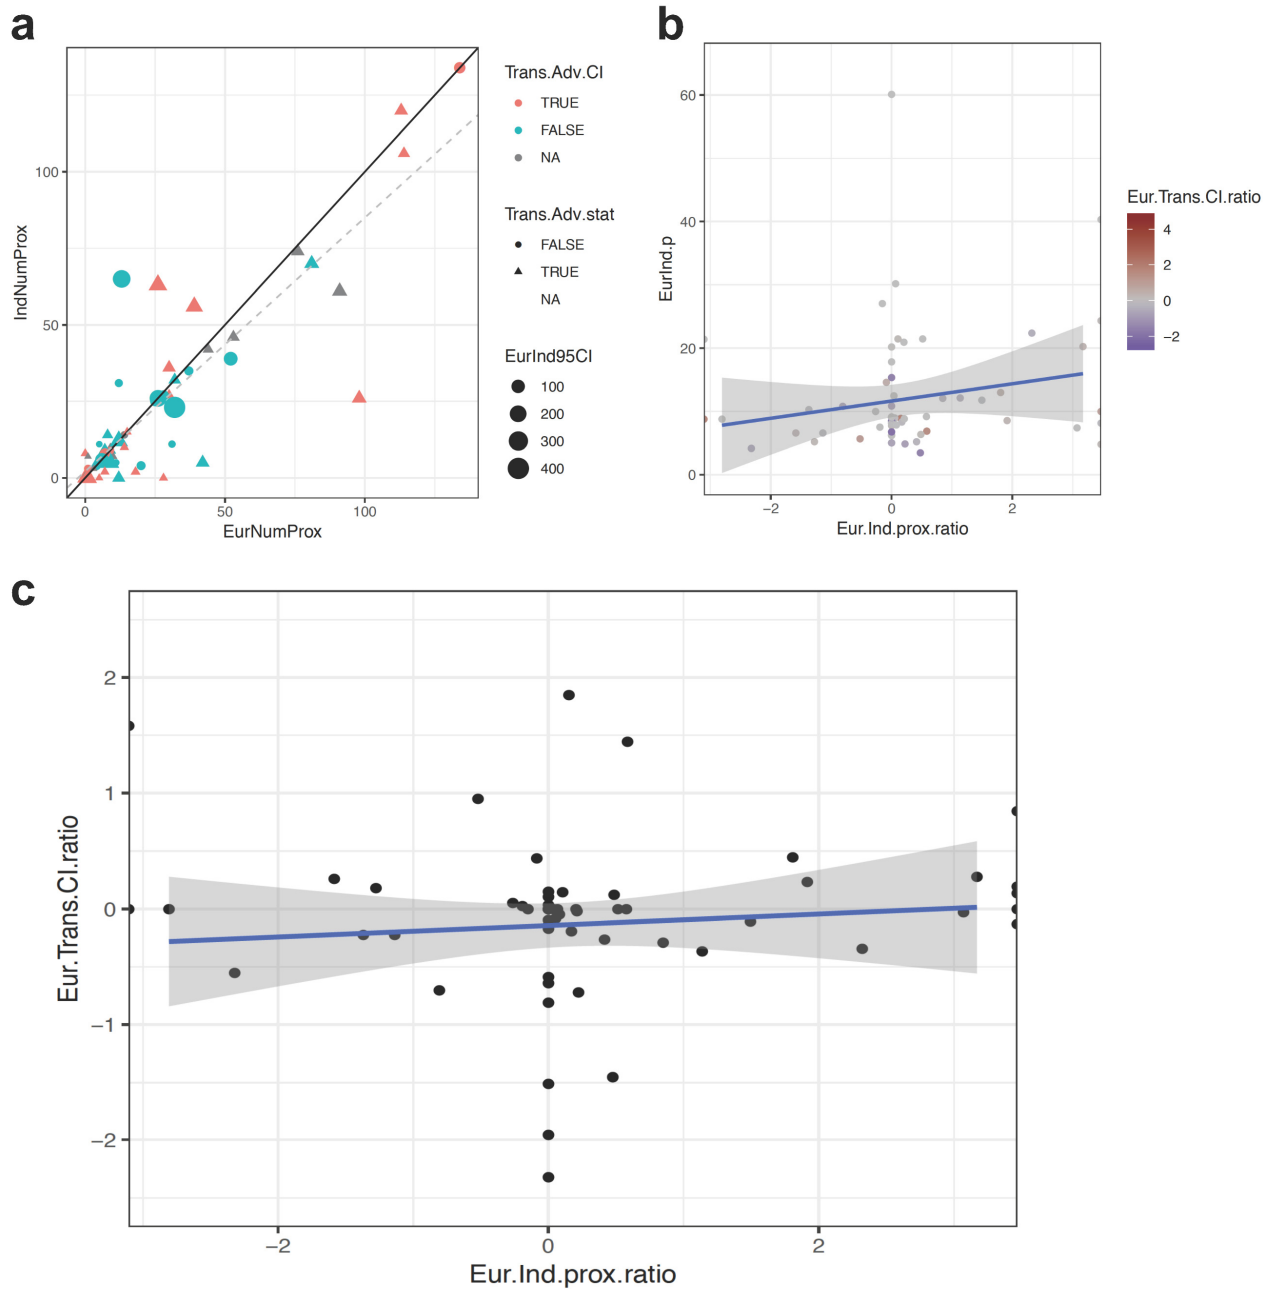

**Figure S41. Comparisons between the number of population-specific LD proxies, significance of association, and size of credible interval sets for the psoriasis risk loci. a)** The number of LD proxies in 1KGP phase 3 data for each non-MHC psoriasis-associated signal from the transethnic meta-analysis. X-axis shows the number of proxies from EUR, and the y-axis shows the number of proxies from SAS. Figure labels: Trans.Adv.CI: signal that has advantage (i.e. lower number of markers) in the 95% credible interval set in the transethnic meta-analysis; Trans.Adv.stat: signal that has advantage (more significant) in the transethnic meta-analysis; Trans.95CI: the number of markers in the 95% credible interval set in the transethnic meta-analysis. The gray dashed line represents a linear fit, and the black line represents a 1:1 relationship. **b)** The  $\log_2(\text{ratio})$  of the number of LD proxies in EUR vs. SAS (x-axis) is plotted against the  $-\log_{10}(\text{p-value})$  of each marker in the transethnic meta-analysis (y-axis). **c)** The  $\log_2(\text{ratio})$  of the number of LD proxies in EUR vs. SAS (x-axis) is plotted against the ratio of the number of markers in the 95% credible interval in the EUR vs. transethnic meta-analysis (y-axis). In panels b and c, the blue line represents the linear fit, and the shaded area represents 95% confidence interval of the fitted linear model.

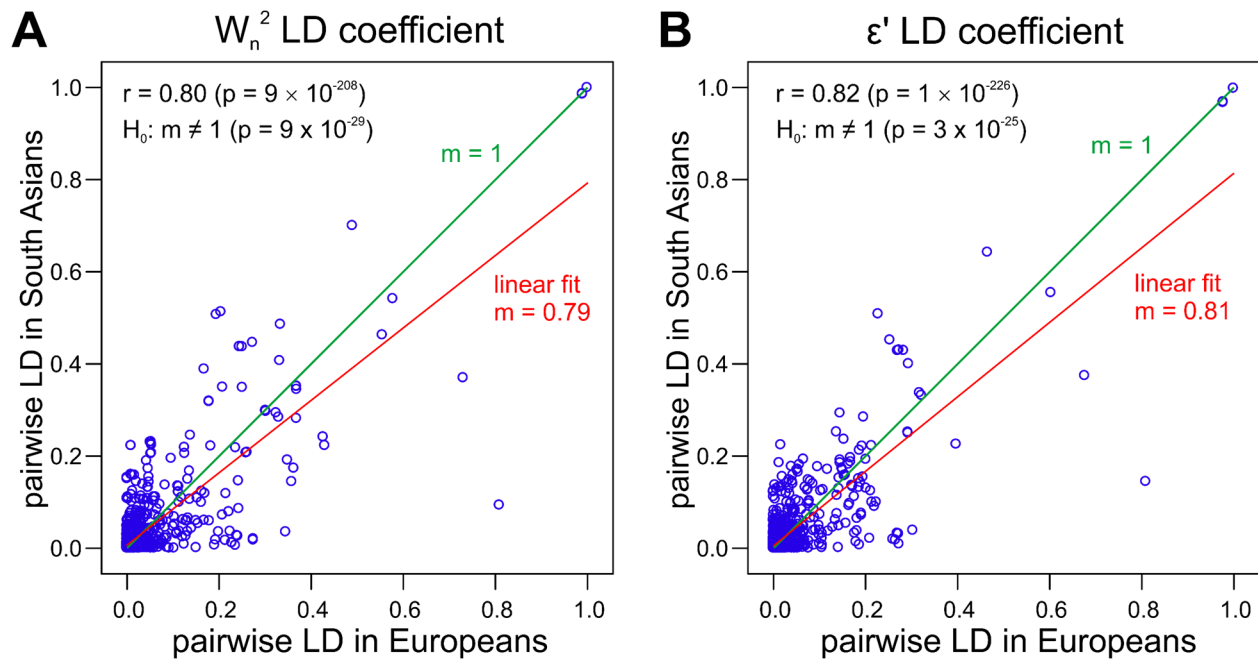

**Figure S42. Scatterplots comparing strength of linkage disequilibrium between South Asians and Europeans for all MHC variants selected by stepwise association analysis for South Asians, Europeans, or South Asians and Europeans combined.** Panels A and B show results for the  $W_n^2$  and  $\epsilon'$  multiallelic coefficients of LD, respectively. For the three multiallelic variants in the regression models, all biallelic split variants are analyzed in addition to the full multiallelic locus. The green and red lines depict a theoretical 1:1 linear correspondence and an empirical linear regression, respectively. The Pearson correlation coefficient and its significance is shown in the upper left corner of each plot, along with the p-value for testing the null hypothesis that the slope ( $m$ ) of the linear regression fit is not equal to 1.



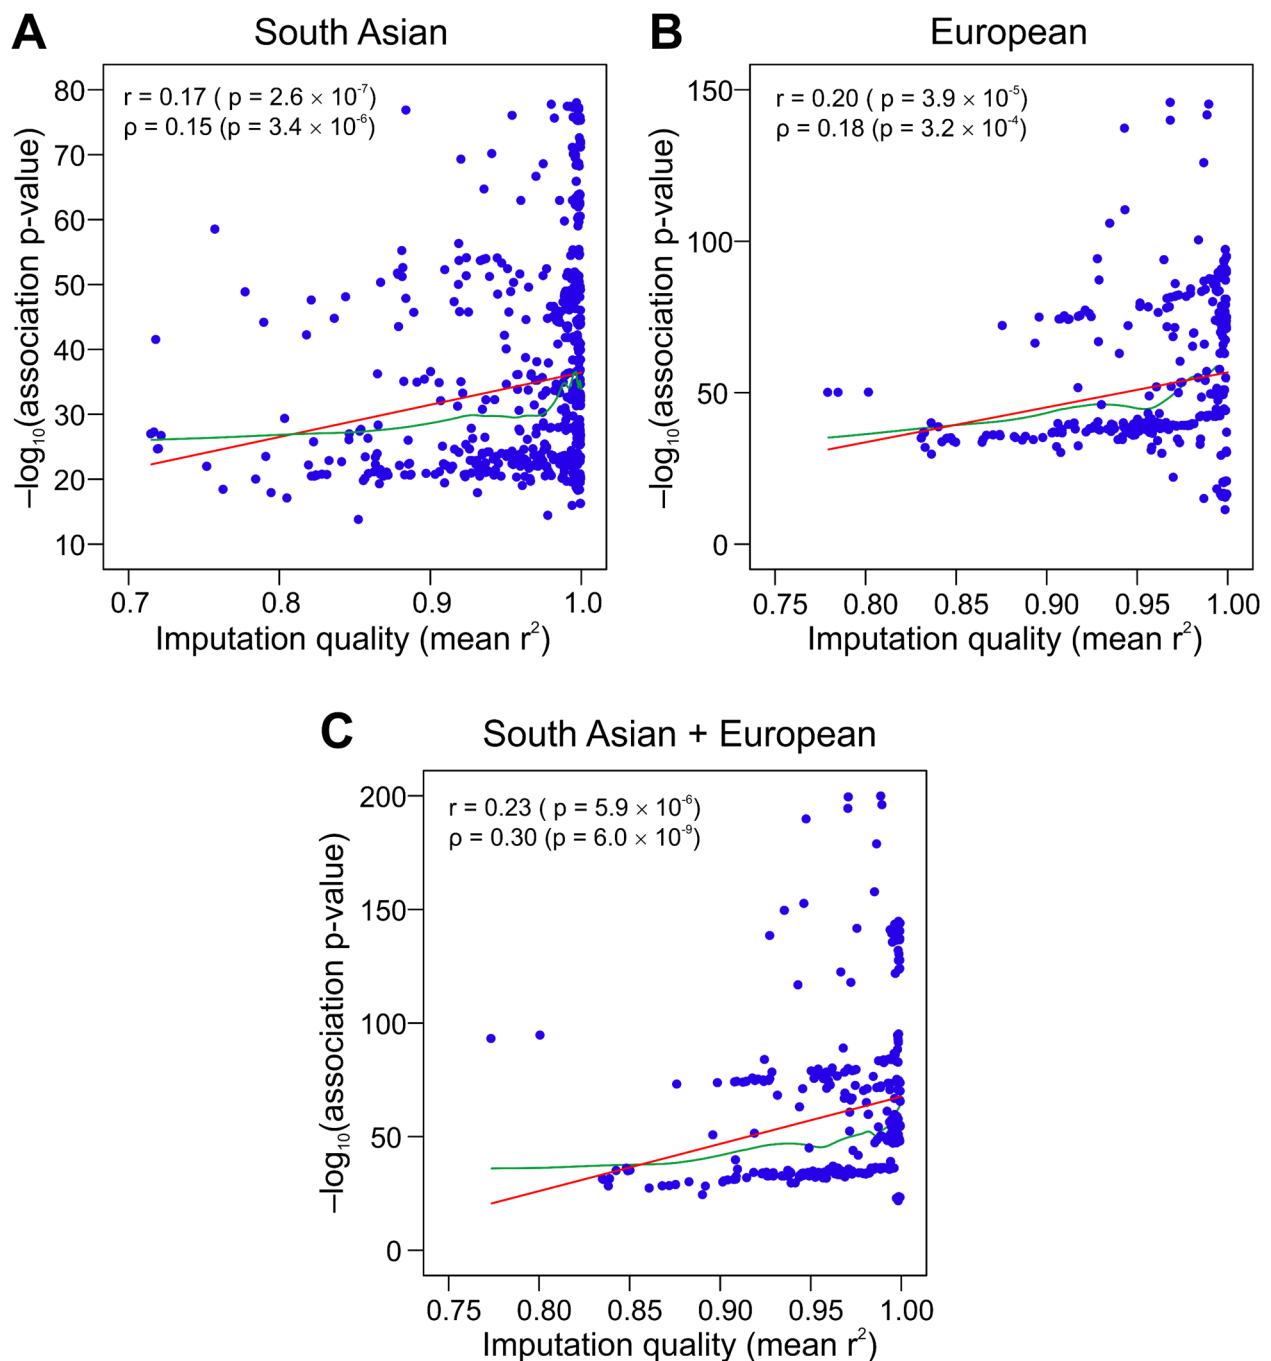

**Figure S43. Scatterplots of the relationship of significance of MHC association with variant imputation quality.** For variants in substantial linkage disequilibrium ( $W_n^2 \geq 0.4$ ) with HLA-C\*06, which is the most strongly associated locus in the full association model for all three ethnic datasets, the relationship of variant association ( $-\log_{10}$  of full model p-value) with weighted mean variant imputation quality (mean Mach- $r^2$ , effective sample size of each study in dataset as weights), is shown. Linear and loess fits are also plotted (red and green lines, respectively), and the Pearson  $r$  and Spearman  $\rho$  correlation coefficients and their significances are shown in the upper left corner of each plot. Panels A, B and C show results for the South Asian, European and transethnic datasets, respectively

**Table S1. Characteristics of the 10 studies analyzed for psoriasis associations.**

| Study                    | Ancestry          | No. individuals |         |        | $N_{\text{eff}}^{(a)}$ | No. Genotyped SNPs <sup>b</sup> |                           |         | Type of Genotyping Microarray <sup>d</sup>    |
|--------------------------|-------------------|-----------------|---------|--------|------------------------|---------------------------------|---------------------------|---------|-----------------------------------------------|
|                          |                   | PsV             | Control | Total  |                        | classical MHC <sup>c</sup>      | flanking MHC <sup>c</sup> | chr1–22 |                                               |
| South Asian, batch 1     | Indian            | 952             | 855     | 1807   | 1802                   | 6533                            | 5201                      | 909,101 | exome + genome-wide                           |
| South Asian, batches 2+3 | Indian, Pakistani | 1638            | 865     | 2503   | 2264                   | 3615                            | 2851                      | 508,389 | exome + genome-wide                           |
| CASP GWAS                | European          | 1336            | 1367    | 2703   | 2703                   | 1235                            | 1553                      | 438,609 | genome-wide                                   |
| Exomechip                | European          | 3845            | 4020    | 7865   | 7861                   | 4547                            | 2186                      | 461,092 | exome + genome-wide + custom PsV fine-mapping |
| GAPC Immunochip          | European          | 2815            | 6730    | 9545   | 7939                   | 1248                            | 1603                      | 489,501 | autoimmune & inflammatory disease loci        |
| Genizon GWAS             | European          | 760             | 992     | 1752   | 1721                   | 6032                            | 2734                      | 169,411 | genome-wide                                   |
| Kiel GWAS                | European          | 464             | 1135    | 1599   | 1317                   | 1344                            | 1654                      | 504,625 | genome-wide                                   |
| PAGE Immunochip          | European          | 3167            | 7380    | 10,547 | 8864                   | 5932                            | 2665                      | 160,228 | autoimmune & inflammatory disease loci        |
| PsA GWAS                 | European          | 1402            | 1398    | 2800   | 2800                   | 10,929                          | 16,961                    | 972,453 | genome-wide                                   |
| WTCCC2 GWAS              | European          | 2178            | 5172    | 7350   | 6130                   | 1541                            | 1737                      | 515,579 | genome-wide                                   |
| All                      | —                 | 18,557          | 29,914  | 48,471 | 43,401                 | —                               | —                         | —       | —                                             |

Abbreviations: CASP, Collaborative Association Study of Psoriasis; GAPC, Genetic Analysis of Psoriasis Consortium; GWAS, genome-wide association study;  $N_{\text{eff}}$ , effective sample size; PAGE, Psoriasis Association of Genetics Extension; PsA, psoriatic arthritis; PsV, psoriasis vulgaris; SNP, single nucleotide polymorphism; WTCCC2, Wellcome Trust Case Control Consortium 2.

<sup>a</sup>Effective sample size, computed as  $4/(1/N_{\text{PsV}} + 1/N_{\text{control}})$ , is the size of a study with a balanced number of cases and controls having power to detect association equal to that of the actual study.

<sup>b</sup>After applying all quality control measures.

<sup>c</sup>MHC regions: classical (chr6:29.64–33.12 Mb), flanking (chr6:24–29.64 + 33.12–36 Mb); coordinates based on hg19 reference assembly.

<sup>d</sup>Microarrays for South Asian studies: batch1, Illumina OmniExpressExome-8v1-1\_B; batch 2, Illumina HumanCoreExome-12v1-1\_B; batch 3, Illumina HumanCoreExome-24v1-0\_A.

**Table S2. Validation sets used to assess accuracy of imputation for European ancestry individuals.**

| <b>Psoriasis Study</b> | <b>No. samples in study with genotyped 1/2-field HLA alleles</b> |              |              |                 |                 |                 |
|------------------------|------------------------------------------------------------------|--------------|--------------|-----------------|-----------------|-----------------|
|                        | <b>HLA-A</b>                                                     | <b>HLA-B</b> | <b>HLA-C</b> | <b>HLA-DQA1</b> | <b>HLA-DQB1</b> | <b>HLA-DRB1</b> |
| CASP GWAS              | 112/112                                                          | 116/116      | 558/558      | NA              | NA              | NA              |
| Exomechip              | 1155/175                                                         | 1159/904     | 1714/1714    | 174/174         | 91/89           | 91/0            |
| PAGE Immunochip        | 96/0                                                             | 117/16       | 121/86       | NA              | 86/13           | 81/0            |
| PsA GWAS               | 1369/0                                                           | 1375/995     | 1392/1391    | NA              | 1366/820        | 1373/494        |
| Total                  | 2732/287                                                         | 2767/2031    | 3785/3749    | 174/174         | 1543/922        | 1545/494        |

Abbreviations: CASP, Collaborative Association Study of Psoriasis; GWAS, genome-wide association study; NA, not applicable; PAGE, Psoriasis Association of Genetics Extension; PsA, psoriatic arthritis.

**Table S3. Control of population stratification for 10 studies analyzed for psoriasis associations in the MHC region.**

| Study                    | Ancestry          | No. covariates |                         |       | $\lambda_{GC}^b$ |
|--------------------------|-------------------|----------------|-------------------------|-------|------------------|
|                          |                   | PC             | Geographic <sup>a</sup> | Total |                  |
| South Asian, batch 1     | Indian            | 5              | 0                       | 5     | 1.020            |
| South Asian, batches 2+3 | Indian, Pakistani | 9              | 0                       | 9     | 1.024            |
| CASP GWAS                | European          | 5              | 2                       | 7     | 1.008            |
| Exomechip                | European          | 7              | 4                       | 11    | 1.015            |
| GAPC Immunochip          | European          | 16             | 5                       | 21    | 1.048            |
| Genizon GWAS             | European          | 4              | 0                       | 4     | 1.000            |
| Kiel GWAS                | European          | 3              | 0                       | 3     | 1.036            |
| PAGE Immunochip          | European          | 6              | 2                       | 8     | 1.013            |
| PsA GWAS                 | European          | 4              | 2                       | 6     | 1.008            |
| WTCCC2 GWAS              | European          | 7              | 0                       | 7     | 1.037            |

Abbreviations: CASP, Collaborative Association Study of Psoriasis; GAPC, Genetic Analysis of Psoriasis Consortium; GWAS, genome-wide association study; PAGE, Psoriasis Association of Genetics Extension; PC, principal component; PsA, psoriatic arthritis; WTCCC2, Wellcome Trust Case Control Consortium 2.

<sup>a</sup>Number of geographic cohort indicator covariables after dropping one to avoid complete linear dependency.

<sup>b</sup>Robust estimate of the genomic control scaling parameter<sup>4</sup>, a measure of residual population structure, based on association testing of microarray genotypes with genome-wide coverage.

**Table S4. Heterogeneity of log(OR) effect sizes across studies in each meta-analysis.**

| Psoriasis risk variant <sup>a</sup> | I <sup>2</sup> index (%) <sup>b</sup> |      |         | Cochran Q test p-value <sup>c</sup> |          |          |
|-------------------------------------|---------------------------------------|------|---------|-------------------------------------|----------|----------|
|                                     | SAS                                   | EUR  | SAS+EUR | SAS                                 | EUR      | SAS+EUR  |
| 1:8278116_G/A                       | 0.0                                   | 6.1  | 0.0     | 4.42E-01                            | 3.83E-01 | 5.29E-01 |
| 1:12054030_G/A                      | 57.7                                  | 0.0  | 14.5    | 1.24E-01                            | 5.19E-01 | 3.10E-01 |
| 1:24519437_C/A                      | 46.7                                  | 0.7  | 13.7    | 1.71E-01                            | 4.24E-01 | 3.17E-01 |
| 1:25297184_G/A                      | 0.0                                   | 0.0  | 0.0     | 9.14E-01                            | 9.53E-01 | 9.55E-01 |
| 1:67713346_T/C                      | 0.0                                   | 0.0  | 0.0     | 3.83E-01                            | 4.29E-01 | 5.27E-01 |
| 1:152593437_T/C                     | 0.0                                   | 43   | 26.9    | 9.53E-01                            | 9.18E-02 | 1.97E-01 |
| 1:168507463_C/T                     | 0.0                                   | 24.2 | 15.4    | 8.19E-01                            | 2.36E-01 | 3.01E-01 |
| 1:206648995_G/A                     | 0.0                                   | 0.0  | 0.0     | 3.84E-01                            | 5.94E-01 | 5.58E-01 |
| 2:61068822_C/CA                     | 13.7                                  | 0.0  | 0.0     | 2.82E-01                            | 9.48E-01 | 7.05E-01 |
| 2:62560332_A/G                      | 0.0                                   | 0.0  | 0.0     | 5.74E-01                            | 4.52E-01 | 5.52E-01 |
| 2:163110536_A/G                     | 0.0                                   | 0.0  | 27.3    | 4.52E-01                            | 8.42E-01 | 1.93E-01 |
| 3:16996035_G/A                      | 0.0                                   | 0.0  | 0.0     | 8.34E-01                            | 9.47E-01 | 9.87E-01 |
| 3:101616982_T/C                     | 16.0                                  | 10.3 | 11.3    | 2.75E-01                            | 3.50E-01 | 3.38E-01 |
| 5:96120198_TAAAC/T                  | 0.0                                   | 41.8 | 28.0    | 5.17E-01                            | 1.00E-01 | 1.86E-01 |
| 5:131996445_A/G                     | 0.0                                   | 4.4  | 0.0     | 9.50E-01                            | 3.96E-01 | 5.05E-01 |
| 5:150467189_G/C                     | 0.0                                   | 0.0  | 0.0     | 8.27E-01                            | 9.53E-01 | 9.08E-01 |
| 5:158829527_A/T                     | 0.0                                   | 0.0  | 0.0     | 6.40E-01                            | 8.54E-01 | 9.15E-01 |
| 6:577820_A/G                        | 0.0                                   | 44.2 | 45.6    | 8.22E-01                            | 8.38E-02 | 5.64E-02 |
| 6:20689945_G/A                      | 11.3                                  | 57.0 | 53.0    | 2.88E-01                            | 2.26E-02 | 2.38E-02 |
| 6:31269946_T/A                      | 0.0                                   | 93.8 | 93.3    | 5.81E-01                            | 2.85E-21 | 1.36E-24 |
| 6:111913262_C/T                     | 0.0                                   | 69.5 | 60.8    | 9.73E-01                            | 1.74E-03 | 6.26E-03 |
| 6:138197824_C/T                     | 0.0                                   | 17.2 | 0.0     | 6.33E-01                            | 2.94E-01 | 4.64E-01 |
| 6:159506600_C/T                     | 0.0                                   | 0.0  | 0.0     | 5.35E-01                            | 6.56E-01 | 7.01E-01 |
| 7:37385365_A/G                      | 0.0                                   | 0.0  | 0.6     | 4.78E-01                            | 4.82E-01 | 4.32E-01 |
| 9:32523737_T/C                      | 0.0                                   | 0.0  | 0.0     | 5.87E-01                            | 5.93E-01 | 6.83E-01 |
| 9:110814693_C/G                     | 52.2                                  | 29.7 | 26.5    | 1.48E-01                            | 1.91E-01 | 1.99E-01 |
| 10:75594050_G/T                     | 0.0                                   | 12.1 | 10.7    | 3.67E-01                            | 3.36E-01 | 3.44E-01 |
| 10:81043743_A/G                     | 0.0                                   | 7.5  | 0.0     | 4.24E-01                            | 3.72E-01 | 4.44E-01 |
| 10:102039458_G/A                    | 0.0                                   | 22.5 | 0.0     | 6.87E-01                            | 2.65E-01 | 4.61E-01 |
| 11:64123488_TG/T                    | 53.4                                  | 0.0  | 0.0     | 1.43E-01                            | 6.23E-01 | 5.80E-01 |
| 11:109973130_C/A                    | 0.0                                   | 0.0  | 0.0     | 4.21E-01                            | 9.44E-01 | 6.18E-01 |
| 11:128385169_G/A                    | 11.3                                  | 0.0  | 0.0     | 2.88E-01                            | 7.86E-01 | 6.30E-01 |
| 12:56750204_C/T                     | 0.0                                   | 59.0 | 52.3    | 5.47E-01                            | 1.69E-02 | 2.64E-02 |
| 12:112007756_C/T                    | 0.0                                   | 42.0 | 35.8    | 9.06E-01                            | 9.84E-02 | 1.21E-01 |
| 13:50794228_G/A                     | 0.0                                   | 0.0  | 0.0     | 4.05E-01                            | 9.18E-01 | 9.12E-01 |

Table S4. Continued.

| Psoriasis risk variant <sup>3</sup> | I <sup>2</sup> index (%) <sup>1</sup> |      |         | Cochran Q test p-value <sup>2</sup> |          |          |
|-------------------------------------|---------------------------------------|------|---------|-------------------------------------|----------|----------|
|                                     | SAS                                   | EUR  | SAS+EUR | SAS                                 | EUR      | SAS+EUR  |
| 13:99950260_G/A                     | 0.0                                   | 14.9 | 0.0     | 9.82E-01                            | 3.13E-01 | 4.85E-01 |
| 14:35839236_G/C                     | 0.0                                   | 0.0  | 8.3     | 4.24E-01                            | 5.72E-01 | 3.66E-01 |
| 14:98667928_T/C                     | 0.0                                   | 25.7 | 8.8     | 9.64E-01                            | 2.24E-01 | 3.61E-01 |
| 15:31637569_G/C                     | 0.0                                   | 0.0  | 0.0     | 4.56E-01                            | 6.60E-01 | 7.25E-01 |
| 16:11344903_C/T                     | 0.0                                   | 0.0  | 0.0     | 7.32E-01                            | 5.03E-01 | 5.78E-01 |
| 16:31057173_C/CAA                   | 46.4                                  | 19.5 | 15.9    | 1.72E-01                            | 2.75E-01 | 2.96E-01 |
| 17:26124908_G/A                     | 0.0                                   | 0.0  | 0.0     | 4.33E-01                            | 6.01E-01 | 5.56E-01 |
| 17:73851113_C/A                     | 0.0                                   | 0.0  | 0.0     | 4.67E-01                            | 7.98E-01 | 8.85E-01 |
| 18:12857002_G/T                     | 0.0                                   | 0.0  | 0.0     | 9.33E-01                            | 7.87E-01 | 9.13E-01 |
| 18:51791307_T/TTG                   | 0.0                                   | 0.0  | 0.0     | 7.35E-01                            | 4.49E-01 | 6.28E-01 |
| 19:10463118_G/C                     | 0.0                                   | 0.0  | 0.0     | 3.55E-01                            | 9.00E-01 | 6.11E-01 |
| 19:10819967_C/T                     | 6.6                                   | 45.7 | 51.2    | 3.01E-01                            | 7.48E-02 | 3.03E-02 |
| 19:49210869_A/G                     | 0.0                                   | 0.0  | 6.7     | 6.28E-01                            | 5.39E-01 | 3.80E-01 |
| 20:48561280_T/C                     | 0.0                                   | 0.0  | 0.0     | 6.70E-01                            | 6.39E-01 | 7.98E-01 |
| 22:21917479_C/T                     | 53.3                                  | 0.0  | 0.0     | 1.44E-01                            | 5.33E-01 | 5.15E-01 |

Abbreviations: EUR, European; SAS, South Asian.

<sup>a</sup>Psoriasis risk variants use a chrom:hg19\_position\_REF/ALT naming convention.

<sup>b</sup>I<sup>2</sup> index estimates the percentage of variability in the log(OR) effect sizes across studies that is due to real rather than chance differences.

<sup>c</sup>Cochran's Q test is an extension of the McNemar test that tests for heterogeneity of the log(OR) across studies in each meta-analysis. Nominal p-values are reported and can be multiplied by 50 to provide a Bonferroni correction for multiple testing.

**Table S5. Credible interval analysis of the EUR and transethnic meta-analyses for established non-MHC psoriasis risk loci.**

| Established psoriasis locus |     |           |           |             | EUR 95% Bayesian CI |          |      |             | Transethnic 95% Bayesian CI |          |     |             |
|-----------------------------|-----|-----------|-----------|-------------|---------------------|----------|------|-------------|-----------------------------|----------|-----|-------------|
| ID                          | Chr | Start pos | End pos   | No. markers | Best marker         |          |      | No. markers | Best marker                 |          |     | No. markers |
|                             |     |           |           |             | Chr:pos             | p-value  | PP   |             | Chr:pos                     | p-value  | PP  |             |
| chr1:8268095                | 1   | 8068095   | 8468095   | 1222        | 1:8282233           | 9.59E-11 | 32%  | 16          | 1:8278116                   | 1.41E-11 | 30% | 28          |
| chr1:12053100               | 1   | 11853100  | 12253100  | 1475        | 1:12047028          | 1.29E-07 | 4%   | 83          | 1:12054030                  | 1.22E-09 | 7%  | 23          |
| chr1:24518643               | 1   | 24318643  | 24718643  | 1285        | 1:24513154          | 3.16E-18 | 30%  | 17          | 1:24519437                  | 5.43E-21 | 22% | 14          |
| chr1:25293084               | 1   | 25093084  | 25493084  | 1267        | 1:25297184          | 2.14E-18 | 24%  | 43          | 1:25297184                  | 1.17E-21 | 24% | 43          |
| chr1:67726104               | 1   | 67526104  | 67926104  | 1299        | 1:67707690          | 4.56E-24 | 21%  | 11          | 1:67713346                  | 4.22E-25 | 21% | 10          |
| chr1:69788482               | 1   | 69588482  | 69988482  | 1065        | 1:69790226          | 3.87E-05 | 9%   | 192         | 1:69790226                  | 6.81E-05 | 7%  | 281         |
| chr1:78450517               | 1   | 78250517  | 78650517  | 1140        | 1:78444764          | 6.34E-07 | 79%  | 10          | 1:78444764                  | 6.34E-07 | 80% | 11          |
| chr1:152590187              | 1   | 152390187 | 152790187 | 1238        | 1:152593549         | 1.44E-27 | 5%   | 25          | 1:152593437                 | 6.30E-31 | 5%  | 25          |
| chr1:168507463              | 1   | 168307463 | 168707463 | 1466        | 1:168507463         | 5.56E-07 | 61%  | 30          | 1:168507463                 | 1.68E-09 | 91% | 10          |
| chr1:172675097              | 1   | 172475097 | 172875097 | 878         | 1:172675097         | 4.83E-07 | 8%   | 15          | 1:172674998                 | 5.84E-07 | 8%  | 15          |
| chr1:197671115              | 1   | 197471115 | 197871115 | 704         | 1:197814685         | 6.52E-06 | 11%  | 240         | 1:197704717                 | 2.21E-06 | 6%  | 124         |
| chr1:206655331              | 1   | 206455331 | 206855331 | 866         | 1:206648995         | 3.26E-09 | 28%  | 7           | 1:206648995                 | 4.47E-09 | 28% | 8           |
| chr2:61083506               | 2   | 60883506  | 61283506  | 982         | 2:61072205          | 1.30E-23 | 6%   | 26          | 2:61068822                  | 3.76E-23 | 12% | 33          |
| chr2:62551472               | 2   | 62351472  | 62751472  | 1284        | 2:62552321          | 4.21E-11 | 19%  | 9           | 2:62560332                  | 8.59E-13 | 34% | 11          |
| chr2:163260691              | 2   | 163060691 | 163460691 | 575         | 2:163110536         | 1.76E-22 | 80%  | 2           | 2:163110536                 | 1.14E-20 | 94% | 2           |
| chr3:16996035               | 3   | 16796035  | 17196035  | 1298        | 3:17011474          | 1.30E-12 | 14%  | 56          | 3:16996035                  | 3.31E-13 | 7%  | 56          |
| chr3:101663555              | 3   | 101463555 | 101863555 | 1320        | 3:101616982         | 1.08E-09 | 40%  | 53          | 3:101616982                 | 1.16E-09 | 53% | 56          |
| chr3:189615475              | 3   | 189415475 | 189815475 | 1616        | 3:189662658         | 6.66E-07 | 75%  | 60          | 3:189662658                 | 1.26E-07 | 77% | 22          |
| chr5:40370724               | 5   | 40170724  | 40570724  | 1535        | 5:40435058          | 8.55E-05 | 3%   | 167         | 5:40435058                  | 0.00032  | 2%  | 456         |
| chr5:96119273               | 5   | 95919273  | 96319273  | 1822        | 5:96120198          | 2.32E-20 | 19%  | 6           | 5:96120198                  | 3.31E-22 | 19% | 6           |
| chr5:131996445              | 5   | 131796445 | 132196445 | 815         | 5:131996445         | 1.16E-17 | 40%  | 4           | 5:131996445                 | 1.33E-18 | 52% | 4           |
| chr5:150467189              | 5   | 150267189 | 150667189 | 1700        | 5:150469973         | 1.72E-54 | 23%  | 8           | 5:150467189                 | 7.25E-61 | 39% | 8           |
| chr5:158829527              | 5   | 158629527 | 159029527 | 1132        | 5:158829527         | 5.39E-80 | 100% | 1           | 5:158829527                 | 2.95E-81 | 99% | 1           |
| chr6:577820                 | 6   | 377820    | 777820    | 1618        | 6:577820            | 6.44E-11 | 97%  | 1           | 6:577820                    | 4.79E-10 | 90% | 6           |
| chr6:20678430               | 6   | 20478430  | 20878430  | 1530        | 6:20689945          | 6.34E-13 | 30%  | 7           | 6:20689945                  | 7.22E-13 | 26% | 9           |
| chr6:111913262              | 6   | 111713262 | 112113262 | 1288        | 6:111929862         | 2.47E-45 | 71%  | 2           | 6:111913262                 | 1.04E-48 | 90% | 2           |
| chr6:138197824              | 6   | 137997824 | 138397824 | 1226        | 6:138197824         | 1.15E-25 | 43%  | 4           | 6:138197824                 | 8.11E-28 | 45% | 4           |
| chr6:159506600              | 6   | 159306600 | 159706600 | 1860        | 6:159506600         | 5.26E-09 | 41%  | 14          | 6:159506600                 | 6.36E-09 | 30% | 13          |
| chr7:37386237               | 7   | 37186237  | 37586237  | 1446        | 7:37385365          | 1.19E-09 | 41%  | 5           | 7:37385365                  | 3.00E-09 | 44% | 25          |
| chr9:32523737               | 9   | 32323737  | 32723737  | 1059        | 9:32523737          | 1.03E-10 | 53%  | 26          | 9:32523737                  | 2.36E-12 | 96% | 1           |
| chr9:110817020              | 9   | 110617020 | 111017020 | 1470        | 9:110778738         | 8.47E-10 | 8%   | 80          | 9:110814693                 | 6.38E-10 | 5%  | 80          |
| chr9:117558703              | 9   | 117358703 | 117758703 | 1390        | 9:117611743         | 1.85E-05 | 14%  | 293         | 9:117611743                 | 1.38E-05 | 28% | 483         |
| chr10:64369999              | 10  | 64169999  | 64569999  | 1416        | 10:64494348         | 1.04E-05 | 3%   | 127         | 10:64510934                 | 9.61E-06 | 5%  | 143         |
| chr10:75599127              | 10  | 75399127  | 75799127  | 632         | 10:75599127         | 1.49E-12 | 13%  | 13          | 10:75594050                 | 1.64E-12 | 15% | 14          |
| chr10:81032532              | 10  | 80832532  | 81232532  | 1582        | 10:81043743         | 3.25E-11 | 47%  | 16          | 10:81043743                 | 1.62E-11 | 28% | 26          |

Table S5. Continued.

| Established psoriasis locus |     |           |           |             | EUR 95% Bayesian CI |          |      |             | Transethnic 95% Bayesian CI |          |      |             |
|-----------------------------|-----|-----------|-----------|-------------|---------------------|----------|------|-------------|-----------------------------|----------|------|-------------|
| ID                          | Chr | Start pos | End pos   | No. markers | Best marker         |          |      | No. markers | Best marker                 |          |      | No. markers |
|                             |     |           |           |             | Chr:pos             | p-value  | PP   |             | Chr:pos                     | p-value  | PP   |             |
| chr10:89824771              | 10  | 89624771  | 90024771  | 1075        | 10:89637201         | 2.57E-07 | 68%  | 24          | 10:89637201                 | 2.57E-07 | 59%  | 20          |
| chr10:102038641             | 10  | 101838641 | 102238641 | 1157        | 10:102039458        | 5.87E-07 | 6%   | 57          | 10:102039458                | 4.11E-08 | 5%   | 58          |
| chr11:64135298              | 11  | 63935298  | 64335298  | 846         | 11:64122279         | 1.62E-09 | 8%   | 55          | 11:64123488                 | 9.57E-11 | 7%   | 53          |
| chr11:65593444              | 11  | 65393444  | 65793444  | 1053        | 11:65656564         | 7.27E-07 | 17%  | 109         | 11:65656564                 | 4.51E-07 | 14%  | 93          |
| chr11:109962432             | 11  | 109762432 | 110162432 | 927         | 11:109959638        | 2.93E-17 | 13%  | 19          | 11:109973130                | 4.07E-16 | 8%   | 54          |
| chr11:128406438             | 11  | 128206438 | 128606438 | 1174        | 11:128410264        | 3.99E-11 | 17%  | 15          | 11:128385169                | 1.02E-13 | 59%  | 11          |
| chr12:10597207              | 12  | 10397207  | 10797207  | 1591        | 12:10594848         | 5.62E-06 | 2%   | 115         | 12:10573094                 | 5.78E-06 | 4%   | 138         |
| chr12:56750204              | 12  | 56550204  | 56950204  | 635         | 12:56750204         | 4.28E-21 | 3%   | 80          | 12:56750204                 | 6.05E-21 | 3%   | 78          |
| chr12:112059557             | 12  | 111859557 | 112259557 | 413         | 12:112007756        | 1.63E-07 | 25%  | 10          | 12:112007756                | 1.76E-08 | 25%  | 9           |
| chr12:122668326             | 12  | 122468326 | 122868326 | 844         | 12:122661791        | 8.31E-06 | 12%  | 158         | 12:122661791                | 9.42E-06 | 8%   | 246         |
| chr13:40333369              | 13  | 40133369  | 40533369  | 1289        | 13:40302608         | 1.39E-05 | 3%   | 169         | 13:40302608                 | 6.27E-06 | 3%   | 149         |
| chr13:45334194              | 13  | 45134194  | 45534194  | 968         | 13:45322344         | 1.24E-07 | 29%  | 6           | 13:45322344                 | 2.47E-07 | 27%  | 7           |
| chr13:50811220              | 13  | 50611220  | 51011220  | 1076        | 13:50811220         | 4.50E-09 | 20%  | 44          | 13:50794228                 | 7.24E-09 | 19%  | 47          |
| chr13:99950260              | 13  | 99750260  | 100150260 | 1438        | 13:99950260         | 5.34E-09 | 8%   | 28          | 13:99950260                 | 9.52E-10 | 7%   | 42          |
| chr14:35832666              | 14  | 35632666  | 36032666  | 1499        | 14:35832666         | 8.18E-20 | 86%  | 5           | 14:35839236                 | 3.40E-22 | 100% | 1           |
| chr14:98668778:D            | 14  | 98468778  | 98868778  | 1957        | 14:98667928         | 3.08E-08 | 14%  | 55          | 14:98667928                 | 3.18E-08 | 9%   | 54          |
| chr15:31637666              | 15  | 31437666  | 31837666  | 1346        | 15:31637569         | 1.37E-09 | 50%  | 3           | 15:31637569                 | 6.93E-10 | 52%  | 3           |
| chr16:11365500              | 16  | 11165500  | 11565500  | 1981        | 16:11344903         | 1.20E-10 | 28%  | 9           | 16:11344903                 | 1.05E-10 | 25%  | 5           |
| chr16:31004812              | 16  | 30804812  | 31204812  | 533         | 16:31057173         | 2.23E-14 | 20%  | 76          | 16:31057173                 | 2.29E-15 | 24%  | 56          |
| chr17:26124908              | 17  | 25924908  | 26324908  | 1143        | 17:26124908         | 1.89E-21 | 100% | 1           | 17:26124908                 | 3.55E-22 | 100% | 1           |
| chr17:40561579              | 17  | 40361579  | 40761579  | 838         | 17:40536575         | 7.34E-09 | 17%  | 35          | 17:40536575                 | 1.59E-07 | 12%  | 136         |
| chr17:73890363              | 17  | 73690363  | 74090363  | 1011        | 17:73851113         | 1.71E-08 | 11%  | 43          | 17:73851113                 | 7.27E-09 | 16%  | 47          |
| chr17:78178893              | 17  | 77978893  | 78378893  | 1622        | 17:78178830         | 1.31E-06 | 13%  | 12          | 17:78178893                 | 4.13E-07 | 16%  | 11          |
| chr18:12857002              | 18  | 12657002  | 13057002  | 1381        | 18:12875316         | 6.92E-09 | 47%  | 3           | 18:12857002                 | 1.57E-09 | 55%  | 3           |
| chr18:51819750              | 18  | 51619750  | 52019750  | 1243        | 18:51791307         | 2.22E-08 | 2%   | 74          | 18:51791307                 | 1.43E-09 | 3%   | 75          |
| chr19:10463118              | 19  | 10263118  | 10663118  | 1200        | 19:10463118         | 2.02E-41 | 100% | 1           | 19:10463118                 | 4.78E-41 | 100% | 1           |
| chr19:10818092              | 19  | 10618092  | 11018092  | 1101        | 19:10819967         | 5.21E-12 | 14%  | 18          | 19:10819967                 | 5.09E-11 | 14%  | 21          |
| chr19:49206417              | 19  | 49006417  | 49406417  | 1456        | 19:49210869         | 2.46E-09 | 11%  | 33          | 19:49210869                 | 1.42E-08 | 9%   | 34          |
| chr20:48556229              | 20  | 48356229  | 48756229  | 1360        | 20:48590791         | 1.08E-20 | 9%   | 41          | 20:48561280                 | 3.43E-22 | 5%   | 37          |
| chr21:36470865              | 21  | 36270865  | 36670865  | 1287        | 21:36484440         | 2.95E-05 | 6%   | 150         | 21:36484440                 | 1.56E-05 | 10%  | 131         |
| chr22:21979289              | 22  | 21779289  | 22179289  | 802         | 22:21917450         | 1.69E-08 | 2%   | 86          | 22:21917479                 | 2.62E-09 | 5%   | 73          |

Abbreviations: Chr, chromosome; CI, credible interval; EUR, European; pos, position; PP, posterior probability.



**Table S6. The independent signals identified in the transethnic meta-analysis.**

| Established psoriasis locus |     |     |           |           |             | EUR 95% Bayesian CI of independent signal |          |      |             |             | EUR + SAS 95% Bayesian CI of independent signal |          |      |             |             |
|-----------------------------|-----|-----|-----------|-----------|-------------|-------------------------------------------|----------|------|-------------|-------------|-------------------------------------------------|----------|------|-------------|-------------|
| ID                          | Rnd | Chr | Start pos | End Pos   | No. Markers | Best marker                               |          |      | No. markers | Length (bp) | Best marker                                     |          |      | No. markers | Length (bp) |
|                             |     |     |           |           |             | Chr:pos                                   | P-value  | PP   |             |             | Chr:pos                                         | P-value  | PP   |             |             |
| chr1:67726104               | 1   | 1   | 67526104  | 67926104  | 1074        | 1:67623728                                | 2.83E-13 | 8%   | 18          | 24349       | 1:67624304                                      | 9.68E-13 | 9%   | 17          | 24349       |
| chr1:67726104               | 2   | 1   | 67526104  | 67926104  | 1060        | 1:67741314                                | 8.35E-13 | 15%  | 13          | 18189       | 1:67705574                                      | 1.28E-12 | 53%  | 2           | 711         |
| chr2:163260691              | 1   | 2   | 163060691 | 163460691 | 323         | 2:163128824                               | 1.16E-17 | 100% | 1           | 0           | 2:163128824                                     | 9.69E-17 | 100% | 1           | 0           |
| chr5:158829527              | 1   | 5   | 158629527 | 159029527 | 659         | 5:158777001                               | 2.66E-52 | 13%  | 13          | 40751       | 5:158787385                                     | 3.04E-62 | 23%  | 11          | 40450       |
| chr5:158829527              | 2   | 5   | 158629527 | 159029527 | 645         | 5:158811162                               | 2.85E-20 | 15%  | 11          | 42850       | 5:158768365                                     | 4.54E-21 | 35%  | 10          | 42850       |
| chr5:158829527              | 3   | 5   | 158629527 | 159029527 | 634         | 5:158687281                               | 4.55E-07 | 8%   | 34          | 159860      | 5:158687281                                     | 8.15E-08 | 15%  | 27          | 170191      |
| chr6:111913262              | 1   | 6   | 111713262 | 112113262 | 1006        | 6:111839019                               | 5.09E-08 | 51%  | 9           | 135649      | 6:111839019                                     | 3.32E-08 | 58%  | 9           | 135649      |
| chr9:110817020              | 1   | 9   | 110617020 | 111017020 | 347         | 9:110845060                               | 7.63E-08 | 15%  | 19          | 16709       | 9:110845060                                     | 2.26E-09 | 12%  | 18          | 21353       |
| chr14:35832666              | 1   | 14  | 35632666  | 36032666  | 1115        | 14:35828741                               | 1.57E-11 | 81%  | 4           | 39773       | 14:35828741                                     | 9.27E-11 | 69%  | 4           | 39773       |
| chr17:26124908              | 1   | 17  | 25924908  | 26324908  | 922         | 17:26103703                               | 1.59E-10 | 33%  | 19          | 42680       | 17:26103703                                     | 8.32E-13 | 61%  | 14          | 33399       |
| chr17:40561579              | 1   | 17  | 40361579  | 40761579  | 683         | 17:40519890                               | 3.54E-09 | 8%   | 29          | 44035       | 17:40536575                                     | 1.46E-08 | 28%  | 48          | 238188      |
| chr20:48556229              | 1   | 20  | 48356229  | 48756229  | 885         | 20:48642702                               | 3.57E-08 | 54%  | 13          | 49855       | 20:48642702                                     | 6.86E-08 | 50%  | 14          | 49855       |

Note: The best marker(s) of the European + South Asian transethnic meta-analysis from the previous round(s) of the conditional analysis were used.

Abbreviations: Chr, chromosome; CI, credible interval; EUR, European; pos, position; PP, posterior probability; Rnd, round; SAS, South Asian.

**Table S7. Accuracy of 1-field and 2-field HLA alleles imputed by a SNP2HLA reference panel of 397 individuals of South Asian ancestry.**

| HLA allele resolution <sup>a</sup> | Performance Metric                     | HLA-A  | HLA-B  | HLA-C  | HLA-DPA1 | HLA-DPB1 | HLA-DQA1 | HLA-DQB1 | HLA-DRB1 |
|------------------------------------|----------------------------------------|--------|--------|--------|----------|----------|----------|----------|----------|
| 1-field                            | sample accuracy (mean) <sup>b</sup>    | 0.9244 | 0.8548 | 0.9368 | 0.9400   | 0.8552   | 0.9693   | 0.9400   | 0.9102   |
|                                    | sample accuracy (median) <sup>b</sup>  | 0.9550 | 0.8960 | 0.9600 | 0.9900   | 0.9302   | 0.9850   | 0.9552   | 0.9250   |
|                                    | allelic accuracy (mean) <sup>c</sup>   | 0.8059 | 0.8451 | 0.9477 | 0.8408   | 0.5579   | 0.9352   | 0.9341   | 0.9417   |
|                                    | allelic accuracy (median) <sup>c</sup> | 0.9421 | 0.8963 | 0.9727 | 0.8408   | 0.7020   | 0.9427   | 0.9498   | 0.9554   |
| 2-field                            | sample accuracy (mean) <sup>b</sup>    | 0.8166 | 0.7696 | 0.8944 | 0.9298   | 0.8490   | 0.8338   | 0.8932   | 0.7950   |
|                                    | sample accuracy (median) <sup>b</sup>  | 0.8719 | 0.8325 | 0.9403 | 0.9851   | 0.9250   | 0.8844   | 0.9261   | 0.8400   |
|                                    | allelic accuracy (mean) <sup>c</sup>   | 0.4743 | 0.6222 | 0.6212 | 0.4431   | 0.5778   | 0.7224   | 0.8482   | 0.5659   |
|                                    | allelic accuracy (median) <sup>c</sup> | 0.6070 | 0.7755 | 0.8726 | 0.4651   | 0.7607   | 0.8504   | 0.9396   | 0.6796   |

Imputation accuracy of the 397-individual South Asian SNP2HLA panel (UM+BKT+IKMB-SAS) was assessed by leave-one-out cross-validation.

<sup>a</sup>Nomenclature of HLA alleles follows the most recent system,<sup>5</sup> where 1-field alleles describe the allele family (often corresponding to serological antigens), and 2-field alleles describe variations in the amino acid sequence.

<sup>b</sup>Sample accuracy is measured for each individual in the panel by first normalizing the imputed dosages so they sum to 2.0 for each individual across all gene alleles, and then subtracting one-half of the sum for that individual of the positive differences in genotyped vs. imputed dosages of all 1-field or 2-field HLA protein alleles in the reference panel from 1.

<sup>c</sup>Allelic accuracy is measured for each HLA 1-field or 2-field allele in the reference panel by first normalizing the imputed dosages so they sum to 2.0 for each individual across all gene alleles, and then computing the squared Pearson correlation of vectors of genotyped and imputed dosages of that allele for all individuals in the panel.

**Table S8. Data sources for SNP2HLA reference panels constructed and tested by this study.**

| Source dataset           | No. Individuals |          |            |                      |                  |         |       | HLA-DQA1 quality <sup>b</sup> | Reference                                                                                      |
|--------------------------|-----------------|----------|------------|----------------------|------------------|---------|-------|-------------------------------|------------------------------------------------------------------------------------------------|
|                          | South Asian     | European | East Asian | African <sup>a</sup> | Admixed American | Iranian | Total |                               |                                                                                                |
| UM                       | 233             | 0        | 0          | 0                    | 0                | 0       | 233   | good                          | this study                                                                                     |
| BKT <sup>c</sup>         | 23              | 0        | 0          | 0                    | 0                | 0       | 23    | good                          | Liu (2015); <sup>6</sup> Degenhardt (2019) <sup>7</sup>                                        |
| IKMB                     | 143             | 322      | 451        | 312                  | 0                | 132     | 1360  | good                          | Liu (2015); <sup>6</sup> Degenhardt (2019) <sup>7</sup>                                        |
| T1DGC                    | 0               | 5225     | 0          | 0                    | 0                | 0       | 5225  | poor                          | Mychaleckyj (2010); <sup>8</sup> Jia (2013); <sup>9</sup> Onengut-Gumuscu (2015) <sup>10</sup> |
| Pan-Asian                | 120             | 0        | 410        | 0                    | 0                | 0       | 530   | poor                          | Pillai (2014); <sup>11</sup> Okada (2014) <sup>12</sup>                                        |
| 1KGP-ALL-v1 <sup>d</sup> | 541             | 526      | 528        | 700                  | 371              | 0       | 2666  | NA                            | The 1000 Genomes Project Consortium (2015); <sup>13</sup> Abi-Rached (2018) <sup>14</sup>      |
| 1KGP-ALL-v2 <sup>e</sup> | 489             | 503      | 504        | 661                  | 347              | 0       | 2504  | NA                            | The 1000 Genomes Project Consortium (2015); <sup>13</sup> Abi-Rached (2018) <sup>14</sup>      |

Abbreviations: 1KGP-ALL, 1000 Genomes Project, all populations; BKT, B.K. Thelma, IKMB, Institute of Clinical Molecular Biology (Kiel, Germany); NA, not applicable; SAS, South Asian; T1DGC, Type 1 Diabetes Genetics Consortium; UM, University of Michigan.

<sup>a</sup>Includes admixed Africans (all 312 of IKMB, 164 of 1KGP-ALL-v1 and 157 of 1KGP-ALL-v2 datasets).

<sup>b</sup>Older data sources (Pan-Asian and T1DGC) used a method for HLA-DQA1 genotyping that misclassified several alleles that commonly occur in many world populations, including HLA-DQA1\*01:04–01:06, HLA-DQA1\*03:02–03:03, and HLA-DQA1\*05:02–05:09.

<sup>c</sup>BKT is a small subset of the Immunochip-typed IBD case-control Indian samples of B.K. Thelma described in Liu et al.<sup>6</sup> that were HLA-genotyped by Degenhardt et al.<sup>7</sup> but were not included in the final IKMB reference panel (Frauke Degenhardt, 2018, personal communication).

<sup>d</sup>Phase 3 1000 Genome Project samples for which both Affymetrix 6.0 microarray and HLA genotypes were available.

<sup>e</sup>Phase 3 1000 Genome Project samples for which both phased chromosomal haplotypes of sequence-based variant calls and HLA genotypes were available.

**Table S9. Composition of 19 SNP2HLA reference panels constructed and tested for imputation of MHC variants in South Asians.**

| SNP2HLA reference panel           | No. individuals |      |       | No. variants |             |        |         |           |             |        | No. HLA genes <sup>a</sup> |
|-----------------------------------|-----------------|------|-------|--------------|-------------|--------|---------|-----------|-------------|--------|----------------------------|
|                                   | SAS             | EUR  | Total | 1-field HLA  | 2-field HLA | HLA AA | HLA SNP | HLA indel | non-HLA SNP | Total  |                            |
| 1KGP-ALL-v1                       | 541             | 526  | 2666  | 87           | 411         | 749    | 378     | 3         | 2106        | 3734   | 5                          |
| 1KGP-ALL-v2                       | 489             | 503  | 2504  | 87           | 398         | 746    | 376     | 3         | 63,106      | 64,716 | 5                          |
| 1KGP-SAS-v1                       | 541             | 0    | 541   | 70           | 191         | 622    | 335     | 2         | 2093        | 3313   | 5                          |
| 1KGP-SAS-v2                       | 489             | 0    | 489   | 69           | 179         | 621    | 334     | 2         | 57,360      | 58,565 | 5                          |
| IKMB                              | 143             | 322  | 1360  | 140          | 369         | 822    | 447     | 5         | 8803        | 10,586 | 8                          |
| IKMB+BKT                          | 166             | 322  | 1383  | 140          | 369         | 822    | 447     | 5         | 8781        | 10,564 | 8                          |
| IKMB+BKT+UM                       | 397             | 322  | 1614  | 141          | 388         | 828    | 450     | 5         | 2221        | 4033   | 8                          |
| IKMB+BKT+UM+1KGP-ALL-v2           | 886             | 825  | 4118  | 87           | 453         | 764    | 385     | 5         | 2165        | 3859   | 5                          |
| IKMB+BKT+UM+T1DGC                 | 397             | 5547 | 6839  | 146          | 439         | 854    | 455     | 5         | 1840        | 3739   | 8                          |
| IKMB+BKT+UM+T1DGC+1KGP-ALL-v2     | 886             | 6050 | 9343  | 87           | 472         | 787    | 388     | 5         | 1817        | 3556   | 5                          |
| Pan-Asian                         | 120             | 0    | 530   | 95           | 178         | 606    | 1415    | 1         | 6169        | 8464   | 8                          |
| Pan-Asian+T1DGC                   | 120             | 5225 | 5755  | 129          | 319         | 753    | 1244    | 3         | 2641        | 5089   | 8                          |
| T1DGC                             | 0               | 5225 | 5225  | 126          | 298         | 715    | 1615    | 3         | 5868        | 8625   | 8                          |
| UM+BKT+IKMB-SAS                   | 397             | 0    | 397   | 99           | 226         | 728    | 434     | 2         | 2284        | 3773   | 8                          |
| UM+BKT+IKMB-SAS+1KGP-ALL-v2       | 886             | 503  | 2901  | 87           | 417         | 754    | 379     | 3         | 2235        | 3875   | 5                          |
| UM+BKT+IKMB-SAS+Pan-Asian         | 517             | 0    | 927   | 108          | 263         | 747    | 444     | 2         | 1591        | 3155   | 8                          |
| UM+BKT+IKMB-SAS+Pan-Asian+T1DGC   | 517             | 5225 | 6152  | 133          | 366         | 816    | 456     | 3         | 1357        | 3131   | 8                          |
| UM+BKT+IKMB-SAS+T1DGC             | 397             | 5225 | 5622  | 130          | 347         | 813    | 455     | 3         | 1882        | 3630   | 8                          |
| UM+BKT+IKMB-SAS+T1DGC+1KGP-ALL-v2 | 886             | 5728 | 8126  | 87           | 440         | 776    | 382     | 3         | 1851        | 3539   | 5                          |

Abbreviations: 1KGP, 1000 Genomes Project; ALL, all populations (1000 Genomes); AA, amino acid; BKT, B.K. Thelma, EUR, European; IKMB, Institute of Clinical Molecular Biology (Kiel, Germany); indel, insertion-deletion; SAS, South Asian; SNP, single nucleotide polymorphism; T1DGC, Type 1 Diabetes Genetics Consortium; UM, University of Michigan.

<sup>a</sup>Number of HLA genes with genotypes in panel; HLA-A, -B, -C, -DQB1, -DRB1 for panels with 5 HLA genes and HLA-A, -B, -C, -DPA1, -DPB1, -DQA1, -DQB1, -DRB1 for panels with 8 HLA genes.

**Table S10. Accuracy of 2-field HLA protein alleles imputed by the best-performing SNP2HLA panels for individuals of South Asian ancestry.**

| Performance Metric                     | Genes Imputed by SNP2HLA Reference Panel |        |        |          |          |             |          |                   |
|----------------------------------------|------------------------------------------|--------|--------|----------|----------|-------------|----------|-------------------|
|                                        | IKMB+BKT+UM+1KGP-ALL-v2                  |        |        |          |          | IKMB+BKT+UM |          | IKMB+BKT+UM+T1DGC |
|                                        | HLA-A                                    | HLA-B  | HLA-C  | HLA-DQB1 | HLA-DRB1 | HLA-DPA1    | HLA-DPB1 | HLA-DQA1          |
| sample accuracy (mean) <sup>a</sup>    | 0.9535                                   | 0.9266 | 0.9648 | 0.9741   | 0.9379   | 0.9389      | 0.9308   | 0.9242            |
| sample accuracy (median) <sup>a</sup>  | 1.0000                                   | 0.9901 | 1.0000 | 1.0000   | 1.0000   | 1.0000      | 0.9850   | 0.9950            |
| allelic accuracy (mean) <sup>b</sup>   | 0.7915                                   | 0.8184 | 0.7659 | 0.8784   | 0.8059   | 0.5525      | 0.7760   | 0.7794            |
| allelic accuracy (median) <sup>b</sup> | 0.9634                                   | 0.9217 | 0.9625 | 0.9647   | 0.9341   | 0.8186      | 0.9545   | 0.9024            |
| mean performance rank <sup>c</sup>     | 2.1                                      | 5.2    | 2.8    | 1.4      | 1.3      | 3.5         | 1.9      | 2.0               |

Imputation performance for each of the three panels was assessed by leave-one-out cross-validation for a set of 397 HLA-genotyped individuals of South Asian ancestry (IKMB-SAS+BKT+UM) that are also part of each reference panel.

Abbreviations: 1KGP, 1000 Genomes Project; ALL, all populations (1000 Genomes); BKT, B.K. Thelma; IKMB, Institute of Clinical Molecular Biology (Kiel, Germany); SAS, South Asian; T1DGC, Type 1 Diabetes Genetics Consortium; UM, University of Michigan.

<sup>a</sup>Sample accuracy is measured for each individual in the validation set by first normalizing the imputed dosages so they sum to 2.0 for each individual across all gene alleles, and then subtracting one-half of the sum for that individual of the positive differences in genotyped vs. imputed dosages of all 1-field or 2-field HLA alleles in the validation set from 1.

<sup>b</sup>Allelic accuracy is measured for each HLA 1-field or 2-field allele in the validation set by first normalizing the imputed dosages so they sum to 2.0 for each individual across all gene alleles, and then computing the squared Pearson correlation of vectors of genotyped and imputed dosages of that allele for all individuals in the validation set.

<sup>c</sup>Mean performance rank is computed as the mean of the rank of the best panel for 12 different metrics comparing it with all others being assessed (total of 19 panels for HLA-A, -B, -C, -DQB1 and -DRB1 and 11 panels for HLA-DPA1, -DPB1 and -DQA1). These 12 metrics consist of 3 paired-sample comparison measures based on the Wilcoxon signed rank test (mean biserial correlation, no. comparisons where rank sum of panel  $i$  > rank sum panel  $j$ , no. comparisons where rank sum panel  $i$  is significantly > rank sum panel  $j$ ) and 3 paired-sample measures based on the paired t-test (mean paired difference, no. pairs where mean difference of panel  $i$  minus panel  $j$  is > 0, no. pairs where mean difference of panel  $i$  – panel  $j$  is significantly > 0 based on bootstrapping); each of these 6 paired-sample measures is applied to both the set of 2-field sample accuracies for all individuals in the validation set and the set of allelic accuracies for all 2-field alleles in the validation set.

**Table S11. Accuracy of HLA alleles imputed by the best-performing SAS panel for populations in the phase 3 1000 Genomes dataset.**

| Resolution | Gene     | mean sample accuracy for 1KGP super population <sup>a</sup> |        |        |        |        | mean allelic accuracy for 1KGP super population <sup>b</sup> |        |        |        |        |
|------------|----------|-------------------------------------------------------------|--------|--------|--------|--------|--------------------------------------------------------------|--------|--------|--------|--------|
|            |          | AFR                                                         | AMR    | EAS    | EUR    | SAS    | AFR                                                          | AMR    | EAS    | EUR    | SAS    |
| 1-field    | HLA-A    | 0.9901                                                      | 0.9911 | 0.9913 | 0.9910 | 0.9879 | 0.9598                                                       | 0.9686 | 0.9223 | 0.9763 | 0.9777 |
|            | HLA-B    | 0.9547                                                      | 0.9566 | 0.9655 | 0.9829 | 0.9743 | 0.9079                                                       | 0.9387 | 0.9231 | 0.9305 | 0.8884 |
|            | HLA-C    | 0.9971                                                      | 0.9967 | 0.9986 | 0.9974 | 0.9930 | 0.9955                                                       | 0.9919 | 0.9987 | 0.9995 | 0.9873 |
|            | HLA-DQB1 | 0.9889                                                      | 0.9895 | 0.9922 | 0.9959 | 0.9908 | 0.9868                                                       | 0.9849 | 0.9928 | 0.9942 | 0.9852 |
|            | HLA-DRB1 | 0.9627                                                      | 0.9806 | 0.9889 | 0.9862 | 0.9864 | 0.9667                                                       | 0.9810 | 0.9923 | 0.9829 | 0.9831 |
| 2-field    | HLA-A    | 0.9634                                                      | 0.9122 | 0.9309 | 0.9702 | 0.9513 | 0.7452                                                       | 0.7105 | 0.7291 | 0.8855 | 0.6626 |
|            | HLA-B    | 0.9236                                                      | 0.8311 | 0.9311 | 0.9531 | 0.9352 | 0.7436                                                       | 0.5990 | 0.8339 | 0.8339 | 0.7881 |
|            | HLA-C    | 0.9717                                                      | 0.9612 | 0.9722 | 0.9809 | 0.9767 | 0.7516                                                       | 0.8298 | 0.8561 | 0.8444 | 0.7199 |
|            | HLA-DQB1 | 0.9658                                                      | 0.9707 | 0.9668 | 0.9818 | 0.9675 | 0.8240                                                       | 0.7789 | 0.7388 | 0.9423 | 0.7501 |
|            | HLA-DRB1 | 0.9360                                                      | 0.8647 | 0.9421 | 0.9289 | 0.9306 | 0.7463                                                       | 0.7622 | 0.7951 | 0.6895 | 0.6765 |

Imputation performance of SAS panel IKMB+BKT+UM+1KGP-ALL-v2 was assessed by leave-one-out cross-validation for a set of 661, 347, 504, 503 and 489 HLA-genotyped individuals of the five super populations of phase 3 of the 1000 Genomes project (1000 Genomes), which are also part of this reference panel.

Abbreviations: 1KGP, 1000 Genomes Project, AFR (African 1KGP super population), AMR (mixed American 1KGP super population), EAS (East Asian 1KGP super population), EUR (European 1KGP super population), SAS (South Asian 1KGP super population).<sup>13</sup>

<sup>a</sup>Sample accuracy is measured for each individual in the validation set by first normalizing the imputed dosages so they sum to 2.0 for each individual across all gene alleles, and then subtracting one-half of the sum for that individual of the positive differences in genotyped vs. imputed dosages of all 1-field or 2-field HLA alleles in the validation set from 1.

<sup>b</sup>Allelic accuracy is measured for each HLA 1-field or 2-field allele in the validation set by panel by first normalizing the imputed dosages so they sum to 2.0 for each individual across all gene alleles, and then computing the squared Pearson correlation of vectors of genotyped and imputed dosages of that allele for all individuals in the validation set.

**Table S12. Composition of 20 SNP2HLA reference panels constructed and tested for imputation of MHC variants in Europeans.**

| SNP2HLA reference panel    | No. individuals |      |       | No. variants |             |        |         |           |             |        | No. HLA genes <sup>a</sup> |
|----------------------------|-----------------|------|-------|--------------|-------------|--------|---------|-----------|-------------|--------|----------------------------|
|                            | SAS             | EUR  | Total | 1-field HLA  | 2-field HLA | HLA AA | HLA SNP | HLA indel | non-HLA SNP | Total  |                            |
| 1KGP-ALL-v1                | 541             | 526  | 2666  | 87           | 411         | 749    | 378     | 3         | 2106        | 3734   | 5                          |
| 1KGP-ALL-v2                | 489             | 503  | 2504  | 87           | 398         | 746    | 376     | 3         | 63,106      | 64,716 | 5                          |
| 1KGP-EUR-v1                | 0               | 526  | 526   | 75           | 165         | 512    | 597     | 2         | 2108        | 3459   | 5                          |
| 1KGP-EUR-v2                | 0               | 503  | 503   | 75           | 165         | 512    | 597     | 2         | 56,218      | 57,569 | 5                          |
| IKMB                       | 143             | 322  | 1360  | 140          | 369         | 822    | 447     | 5         | 8803        | 10586  | 8                          |
| IKMB+BKT                   | 166             | 322  | 1383  | 140          | 369         | 822    | 447     | 5         | 8781        | 10564  | 8                          |
| IKMB+BKT+1KGP-ALL-v1       | 707             | 848  | 4049  | 87           | 456         | 764    | 385     | 5         | 1179        | 2876   | 5                          |
| IKMB+BKT+1KGP-ALL-v2       | 655             | 825  | 3887  | 87           | 443         | 761    | 383     | 5         | 6722        | 8401   | 5                          |
| IKMB+BKT+1KGP-EUR-v2       | 655             | 825  | 1886  | 87           | 306         | 670    | 361     | 5         | 6497        | 7926   | 5                          |
| IKMB+BKT+T1DGC             | 166             | 5547 | 6608  | 145          | 423         | 848    | 452     | 5         | 5562        | 7435   | 8                          |
| IKMB+BKT+T1DGC+1KGP-ALL-v1 | 707             | 6073 | 9274  | 87           | 474         | 785    | 387     | 5         | 932         | 2670   | 5                          |
| IKMB+BKT+T1DGC+1KGP-ALL-v2 | 655             | 6050 | 9112  | 87           | 463         | 784    | 386     | 5         | 5426        | 7151   | 5                          |
| IKMB+BKT+T1DGC+1KGP-EUR-v2 | 166             | 6050 | 7111  | 87           | 351         | 697    | 366     | 5         | 5407        | 6913   | 5                          |
| IKMB+BKT+UM                | 397             | 322  | 1614  | 141          | 388         | 828    | 450     | 5         | 2221        | 4033   | 8                          |
| IKMB+BKT+UM+T1DGC          | 397             | 5547 | 6839  | 146          | 439         | 854    | 455     | 5         | 1840        | 3739   | 8                          |
| IKMB+T1DGC                 | 143             | 5547 | 6585  | 145          | 423         | 848    | 452     | 5         | 5575        | 7448   | 8                          |
| T1DGC                      | 0               | 5225 | 5225  | 126          | 298         | 715    | 1615    | 3         | 5868        | 8625   | 8                          |
| T1DGC+1KGP-ALL-v1          | 541             | 5751 | 7891  | 87           | 433         | 769    | 380     | 3         | 956         | 2628   | 5                          |
| T1DGC+1KGP-ALL-v2          | 489             | 5728 | 7729  | 87           | 422         | 768    | 379     | 3         | 5660        | 7319   | 5                          |
| T1DGC+1KGP-EUR-v2          | 0               | 5728 | 5728  | 85           | 267         | 617    | 436     | 3         | 5639        | 7047   | 5                          |

Abbreviations: 1KGP, 1000 Genomes Project; ALL, all populations (1000 Genomes); AA, amino acid; BKT, B.K. Thelma, EUR, European; IKMB, Institute of Clinical Molecular Biology (Kiel, Germany); indel, insertion-deletion; SAS, South Asian; SNP, single nucleotide polymorphism; T1DGC, Type 1 Diabetes Genetics Consortium; UM, University of Michigan.

<sup>a</sup>Number of HLA genes with genotypes in panel; HLA-A, -B, -C, -DQB1, -DRB1 for panels with 5 HLA genes and HLA-A, -B, -C, -DPA1, -DPB1, -DQA1, -DQB1, -DRB1 for panels with 8 HLA genes.

**Table S13. Accuracy of 2-field HLA protein alleles imputed by the best-performing SNP2HLA panels for individuals of European ancestry.**

| Performance Metric                     | Genes Imputed by SNP2HLA Reference Panel |              |              |                 |                 |                 |
|----------------------------------------|------------------------------------------|--------------|--------------|-----------------|-----------------|-----------------|
|                                        | T1DGC+1KGP-EUR-v2                        |              |              |                 |                 | IKMB+BKT        |
|                                        | <i>HLA-A</i>                             | <i>HLA-B</i> | <i>HLA-C</i> | <i>HLA-DQB1</i> | <i>HLA-DRB1</i> | <i>HLA-DQA1</i> |
| sample accuracy (mean) <sup>a</sup>    | 0.9827                                   | 0.9650       | 0.9830       | 0.9871          | 0.9498          | 0.9601          |
| sample accuracy (median) <sup>a</sup>  | 1.0000                                   | 1.0000       | 1.0000       | 1.0000          | 1.0000          | 1.0000          |
| allelic accuracy (mean) <sup>b</sup>   | 0.9284                                   | 0.7429       | 0.8552       | 0.9010          | 0.8226          | 0.8704          |
| allelic accuracy (median) <sup>b</sup> | 0.9995                                   | 0.9396       | 0.9735       | 0.9956          | 0.9218          | 0.9908          |
| mean performance rank <sup>c</sup>     | 2.7                                      | 4.5          | 8.3          | 3.8             | 2.6             | 1.1             |

Imputation performance for each of the two panels was assessed by independent validation for a set of up to 3749 HLA-genotyped individuals of European ancestry from four psoriasis case-control studies (CASP-GWAS, Exomechip, PAGE Immunochip, PsA GWAS) that are independent of all assessed reference panels.

Abbreviations: 1KGP, 1000 Genomes Project; BKT, B.K. Thelma; IKMB, Institute of Clinical Molecular Biology (Kiel, Germany); EUR, European; T1DGC, Type 1 Diabetes Genetics Consortium; UM.

<sup>a</sup>Sample accuracy is measured for each individual in the validation set by first normalizing the imputed dosages so they sum to 2.0 for each individual across all gene alleles, and then subtracting one-half of the sum for that individual of the positive differences in genotyped vs. imputed dosages of all 1-field or 2-field HLA alleles in the validation set from 1.

<sup>b</sup>Allelic accuracy is measured for each HLA 1-field or 2-field allele in the validation set by first normalizing the imputed dosages so they sum to 2.0 for each individual across all gene alleles, and then computing the squared Pearson correlation of vectors of genotyped and imputed dosages of that allele for all individuals in the validation set.

<sup>c</sup>Mean performance rank is computed as the mean of the rank of the best panel for 12 different metrics comparing it with all others being assessed (total of 20 panels for *HLA-A*, *-B*, *-C*, *-DQB1* and *-DRB1* and 7 panels for *HLA -DQA1*). These 12 metrics consist of 3 paired-sample comparison measures based on the Wilcoxon signed rank test (mean biserial correlation, no. comparisons where rank sum of panel *i* > rank sum panel *j*, no. comparisons where rank sum panel *i* is significantly > rank sum panel *j*) and 3 paired-sample measures based on the paired t-test (mean paired difference, no. pairs where mean difference of panel *i* minus panel *j* is > 0, no. pairs where mean difference of panel *i* – panel *j* is significantly > 0 based on bootstrapping); each of these 6 paired-sample measures is applied to both the set of 2-field sample accuracies for all individuals in the validation set and the set of allelic accuracies for all 2-field alleles in the validation set.



**Table S14. Counts and densities of coding, non-coding and immune-related genes in the extended MHC region.**

| Genomic Region <sup>a</sup>      | chr6 position (Mb hg19) |            |             | No. genes <sup>b</sup> |            |        |        | Density of genes (per Mb) |            |       |        |
|----------------------------------|-------------------------|------------|-------------|------------------------|------------|--------|--------|---------------------------|------------|-------|--------|
|                                  | Region start            | Region end | Length (Mb) | Coding                 | Non-coding | Total  | Immune | Coding                    | Non-coding | Total | Immune |
| Flanking MHC, telomeric          | 24.00                   | 25.73      | 1.73        | 18                     | 18         | 36     | 0      | 10.4                      | 10.4       | 20.8  | 0.0    |
| Horton Extended MHC, telomeric   | 25.73                   | 29.64      | 3.91        | 109                    | 57         | 166    | 2      | 27.9                      | 14.6       | 42.5  | 0.5    |
| Classical MHC                    | 29.64                   | 33.12      | 3.48        | 137                    | 76         | 213    | 37     | 39.4                      | 21.8       | 61.2  | 10.6   |
| Horton Extended MHC, centromeric | 33.12                   | 33.37      | 0.25        | 16                     | 4          | 20     | 3      | 64.0                      | 16.0       | 80.0  | 12.0   |
| Flanking MHC, centromeric        | 33.37                   | 36.00      | 2.63        | 41                     | 25         | 66     | 3      | 15.6                      | 9.5        | 25.1  | 1.1    |
| Extended MHC                     | 24.00                   | 36.00      | 12.00       | 321                    | 180        | 501    | 45     | 26.8                      | 15.0       | 41.8  | 3.7    |
| chr 1-22                         | NA                      | NA         | 2881.03     | 20,486                 | 24,234     | 44,720 | 1752   | 7.1                       | 8.4        | 15.5  | 0.6    |

Abbreviations: NA, not applicable.

<sup>a</sup>The extended MHC region of this study (chr6:24-36 Mb) was broken into five segments based on the bounds of the classical MHC and smaller extended MHC regions defined by Horton et al.<sup>15</sup>

<sup>b</sup>The numbers of coding and non-coding genes were determined by tallying unique gene symbols in the basic gene annotation set of GENCODE version 33lift37. The numbers of immune-related genes were based on a comprehensive list of immunologically important genes downloaded in July, 2020 from the ImmPort Shared Data repository (see Web Resources).

**Table S15. Frequency distribution of variants in the imputed genotype datasets for the MHC region, cross-classified by reference panel source, MHC region and ancestry.**

| Reference panel source <sup>a</sup> | Classical MHC <sup>b</sup> |         |         | Flanking MHC <sup>b</sup> |         |         | Extended MHC <sup>b</sup> |         |         |
|-------------------------------------|----------------------------|---------|---------|---------------------------|---------|---------|---------------------------|---------|---------|
|                                     | SAS                        | EUR     | SAS+EUR | SAS                       | EUR     | SAS+EUR | SAS                       | EUR     | SAS+EUR |
| 1KGP                                | 67,516                     | 62,830  | 63,932  | 95,527                    | 85,383  | 87,451  | 163,043                   | 148,213 | 151,383 |
| HRC                                 | 39,452                     | 43,896  | 43,077  | 83,250                    | 93,473  | 91,438  | 122,672                   | 137,369 | 134,515 |
| SNP2HLA (5 gene)                    | 2074                       | 1687    | 1635    | 0                         | 0       | 0       | 2074                      | 1687    | 1635    |
| SNP2HLA (2 gene)                    | 217                        | 398     | 177     | 0                         | 0       | 0       | 217                       | 398     | 177     |
| SNP2HLA (1 gene)                    | 217                        | 214     | 215     | 0                         | 0       | 0       | 217                       | 214     | 215     |
| All                                 | 109,476                    | 109,025 | 109,036 | 178,747                   | 178,856 | 178,889 | 288,223                   | 287,881 | 287,925 |

Abbreviations: 1KGP, 1000 Genomes Project; HRC, Haplotype Reference Consortium; EUR, European; SAS, South Asian.

For multiallelic variants, all counts include both the number of biallelic splits and the number of sets of biallelic splits because these splits are intended to be tested both individually and jointly for association.

<sup>a</sup>For the 1KGP and HRC reference panel sources, frequency counts are means because the number of imputed variants from these two sources in the final merged panel varies among the individual case-control studies. Three SNP2HLA reference panels were used for imputing HLA gene variants in the South Asian and European datasets; 5 gene, 2 gene and 1 gene refer, respectively, to the panels used to impute HLA-A/B/C/DQB1/DRB1, HLA-DPA1/DPB1, or HLA-DQA1 variants.

<sup>b</sup>MHC regions: classical (chr6:29.64-33.12 Mb), flanking (chr6:24-29.64 + 33.12-36 Mb), extended (chr6:24-36 Mb); coordinates based on hg19 reference assembly.

**Table S16. Frequency distribution of variants in the imputed genotype datasets for the MHC region, cross-classified by minor allele frequency, imputation quality, MHC region and ancestry.**

| MHC region <sup>b</sup> | Ancestry | MAF <sup>a</sup> | No. variants with mean imputation quality <sup>a</sup> |           |           |           |           |           |           | Total   |
|-------------------------|----------|------------------|--------------------------------------------------------|-----------|-----------|-----------|-----------|-----------|-----------|---------|
|                         |          |                  | 0.00–0.30                                              | 0.30–0.50 | 0.50–0.70 | 0.70–0.80 | 0.80–0.90 | 0.90–0.95 | 0.95–1.00 |         |
| Classical               | SAS      | ≥ 0.05           | 5022                                                   | 1495      | 2321      | 1705      | 3477      | 2555      | 29,221    | 45,796  |
|                         |          | 0.01–0.05        | 1123                                                   | 344       | 399       | 372       | 875       | 917       | 8159      | 12,189  |
|                         |          | < 0.01           | 31,701                                                 | 4389      | 4197      | 1507      | 1815      | 1177      | 5273      | 50,059  |
|                         |          | Total            | 37,846                                                 | 6228      | 6917      | 3584      | 6167      | 4649      | 42,653    | 108,044 |
|                         | EUR      | ≥ 0.05           | 6138                                                   | 1901      | 1732      | 1301      | 3188      | 3103      | 27,859    | 45,222  |
|                         |          | 0.01–0.05        | 1273                                                   | 324       | 419       | 330       | 840       | 849       | 7002      | 11,037  |
|                         |          | < 0.01           | 25,148                                                 | 5939      | 5181      | 2826      | 3122      | 1943      | 7157      | 51,136  |
|                         |          | Total            | 32,559                                                 | 8164      | 7332      | 4457      | 7150      | 5895      | 42,018    | 107,575 |
|                         | SAS+EUR  | ≥ 0.05           | 5967                                                   | 2006      | 1842      | 1326      | 3365      | 3257      | 27,689    | 45,452  |
|                         |          | 0.01–0.05        | 1206                                                   | 387       | 442       | 346       | 1017      | 1008      | 7655      | 12,061  |
|                         |          | < 0.01           | 25,376                                                 | 6198      | 5466      | 3038      | 3331      | 2389      | 4269      | 50,067  |
|                         |          | Total            | 32,549                                                 | 859       | 7750      | 4710      | 7713      | 6654      | 39,613    | 107,580 |
| Flanking                | SAS      | ≥ 0.05           | 17                                                     | 214       | 597       | 661       | 1719      | 2208      | 17,679    | 23,095  |
|                         |          | 0.01–0.05        | 184                                                    | 613       | 1069      | 972       | 1809      | 1351      | 6218      | 12,216  |
|                         |          | < 0.01           | 102,052                                                | 14,543    | 9799      | 4218      | 4412      | 2525      | 4575      | 142,124 |
|                         |          | Total            | 102,253                                                | 15,370    | 11,465    | 5851      | 7940      | 6084      | 28,472    | 177,435 |
|                         | EUR      | ≥ 0.05           | 40                                                     | 398       | 2935      | 2249      | 2869      | 2836      | 12,179    | 23,506  |
|                         |          | 0.01–0.05        | 143                                                    | 568       | 2122      | 1527      | 1685      | 970       | 3802      | 10,817  |
|                         |          | < 0.01           | 80,800                                                 | 21,619    | 16,883    | 6497      | 6577      | 3920      | 6806      | 143,102 |
|                         |          | Total            | 80,983                                                 | 22,585    | 21,940    | 10,273    | 11,131    | 7226      | 22,787    | 177,425 |
|                         | SAS+EUR  | ≥ 0.05           | 29                                                     | 381       | 2415      | 2576      | 3102      | 3162      | 11,996    | 23,661  |
|                         |          | 0.01–0.05        | 122                                                    | 563       | 2208      | 1608      | 1726      | 1097      | 3563      | 10,887  |
|                         |          | < 0.01           | 82,119                                                 | 22,701    | 17,002    | 6315      | 7267      | 3290      | 4183      | 142,877 |
|                         |          | Total            | 82,270                                                 | 23,645    | 21,625    | 10,499    | 12,095    | 7549      | 19,742    | 177,425 |

**Table S16. (Continued)**

| MHC region <sup>b</sup> | Ancestry | MAF <sup>a</sup> | No. variants with mean imputation quality <sup>a</sup> |           |           |           |           |           |           | Total   |
|-------------------------|----------|------------------|--------------------------------------------------------|-----------|-----------|-----------|-----------|-----------|-----------|---------|
|                         |          |                  | 0.00–0.30                                              | 0.30–0.50 | 0.50–0.70 | 0.70–0.80 | 0.80–0.90 | 0.90–0.95 | 0.95–1.00 |         |
| Extended                | SAS      | ≥ 0.05           | 5039                                                   | 1709      | 2918      | 2366      | 5196      | 4763      | 46,900    | 68,891  |
|                         |          | 0.01–0.05        | 1307                                                   | 957       | 1468      | 1344      | 2684      | 2268      | 14,377    | 24,405  |
|                         |          | < 0.01           | 133,753                                                | 18,932    | 13,996    | 5725      | 6227      | 3702      | 9848      | 192,183 |
|                         |          | Total            | 140,099                                                | 21,598    | 18,382    | 9435      | 14,107    | 10,733    | 71,125    | 285,479 |
|                         | EUR      | ≥ 0.05           | 6178                                                   | 2299      | 4667      | 3550      | 6057      | 5939      | 40,038    | 68,728  |
|                         |          | 0.01–0.05        | 1416                                                   | 892       | 2541      | 1857      | 2525      | 1819      | 10,804    | 21,854  |
|                         |          | < 0.01           | 105,948                                                | 27,558    | 22,064    | 9323      | 9699      | 5863      | 13,963    | 194,418 |
|                         |          | Total            | 113,542                                                | 30,749    | 29,272    | 14,730    | 18,281    | 13,621    | 64,805    | 285,000 |
|                         | SAS+EUR  | ≥ 0.05           | 5996                                                   | 2387      | 4257      | 3902      | 6467      | 6419      | 39,685    | 69,113  |
|                         |          | 0.01–0.05        | 1328                                                   | 950       | 2650      | 1954      | 2743      | 2105      | 11,218    | 22,948  |
|                         |          | < 0.01           | 107,495                                                | 28,899    | 22,468    | 9353      | 10,598    | 5679      | 8452      | 192,944 |
|                         |          | Total            | 114,819                                                | 32,236    | 29,375    | 15,209    | 19,808    | 14,203    | 59,355    | 285,005 |

Frequency counts are restricted to biallelic variants, including splits of multiallelic variants.

Abbreviations: EUR, European; MAF, minor allele frequency; SAS, South Asian.

<sup>a</sup>Membership in MAF and imputation quality bins based on the weighted mean of MAF and empirical imputation quality ( $R^2$ ) values, respectively, across studies in the ancestry group, with the effective sample size of each study as weights.

<sup>b</sup>MHC regions: classical (chr6:29.64–33.12 Mb), flanking (chr6:24–29.64 + 33.12–36 Mb), extended (chr6:24–36 Mb); coordinates based on hg19 reference assembly.

**Table S17. Frequency distribution of variants in the imputed genotype datasets for the MHC region, cross-classified by variant type, MHC region and ancestry.**

| Variant Type                     | Classical MHC <sup>a</sup> |         |         | Flanking MHC <sup>a</sup> |         |         | Extended MHC <sup>a</sup> |         |         |
|----------------------------------|----------------------------|---------|---------|---------------------------|---------|---------|---------------------------|---------|---------|
|                                  | SAS                        | EUR     | SAS+EUR | SAS                       | EUR     | SAS+EUR | SAS                       | EUR     | SAS+EUR |
| SNP                              | 100,186                    | 100,235 | 100,227 | 166,306                   | 166,386 | 166,414 | 266,492                   | 266,621 | 266,641 |
| Indel                            | 7146                       | 7146    | 7153    | 12,330                    | 12,359  | 12,364  | 19,476                    | 19,505  | 19,517  |
| Structural (≥ 50 bp)             | 96                         | 96      | 96      | 111                       | 111     | 111     | 207                       | 207     | 207     |
| Multiallelic, split <sup>b</sup> | 5646                       | 5159    | 5079    | 4814                      | 4814    | 4814    | 10,460                    | 9973    | 9893    |
| Multiallelic, full <sup>c</sup>  | 1432                       | 1450    | 1456    | 1312                      | 1431    | 1464    | 2744                      | 2881    | 2920    |
| HLA 1-field allele               | 141                        | 127     | 122     | 0                         | 0       | 0       | 141                       | 127     | 122     |
| HLA 2-field allele               | 530                        | 328     | 304     | 0                         | 0       | 0       | 530                       | 328     | 304     |
| HLA amino acid                   | 1377                       | 1093    | 1134    | 0                         | 0       | 0       | 1377                      | 1093    | 1134    |
| HLA SNP                          | 13,164                     | 13,173  | 13,150  | 0                         | 0       | 0       | 13,164                    | 13,173  | 13,150  |
| HLA indel                        | 714                        | 707     | 711     | 0                         | 0       | 0       | 714                       | 707     | 711     |
| HLA protein-changing             | 3013                       | 2477    | 2489    | 0                         | 0       | 0       | 3013                      | 2477    | 2489    |
| non-HLA protein-changing         | 2096                       | 2094    | 2095    | 2195                      | 2189    | 2189    | 4291                      | 4283    | 4284    |
| All <sup>d</sup>                 | 109,476                    | 109,025 | 109,036 | 178,747                   | 178,856 | 178,889 | 288,223                   | 287,881 | 287,925 |

Abbreviations: EUR, European; Indel, insertion-deletion polymorphism; SAS, South Asian; SNP, single nucleotide polymorphism.

<sup>a</sup>MHC regions: classical (chr6:29.64-33.12 Mb), flanking (chr6:24-29.64 + 33.12-36 Mb), extended (chr6:24-36 Mb); coordinates based on hg19 reference assembly.

<sup>b</sup>Refers to the individual biallelic variants in the sets that result from splitting of multiallelic variants.

<sup>c</sup>Refers to the full sets of multiallelic variants.

<sup>d</sup>Total number of variants, which is less than the sum of all variant type counts because of overlap among some of the variant type categories.

**Table S18. Proportion of MHC reference panel variants analyzed for association with psoriasis, cross-classified by minor allele frequency, MHC region and ancestry.**

| MAF       | Proportion of variants analyzed for association <sup>a</sup> |       |         |                           |       |         |                           |       |         |
|-----------|--------------------------------------------------------------|-------|---------|---------------------------|-------|---------|---------------------------|-------|---------|
|           | Classical MHC <sup>b</sup>                                   |       |         | Flanking MHC <sup>b</sup> |       |         | Extended MHC <sup>b</sup> |       |         |
|           | SAS                                                          | EUR   | SAS+EUR | SAS                       | EUR   | SAS+EUR | SAS                       | EUR   | SAS+EUR |
| ≥ 0.05    | 0.797                                                        | 0.693 | 0.682   | 0.953                     | 0.712 | 0.679   | 0.849                     | 0.699 | 0.681   |
| 0.01–0.05 | 0.836                                                        | 0.759 | 0.715   | 0.815                     | 0.547 | 0.454   | 0.826                     | 0.655 | 0.591   |
| < 0.01    | 0.179                                                        | 0.173 | 0.092   | 0.092                     | 0.079 | 0.038   | 0.115                     | 0.104 | 0.052   |
| Total     | 0.515                                                        | 0.454 | 0.415   | 0.254                     | 0.191 | 0.150   | 0.353                     | 0.290 | 0.250   |

Abbreviations: EUR, European; MAF, minor allele frequency; SAS, South Asian.

<sup>a</sup>To qualify for association testing, the minimum imputation quality ( $R^2$ ) for a variant among all case-control studies in the analyzed dataset must be  $\geq 0.70$ .

<sup>b</sup>MHC regions: classical (chr6:29.64-33.12 Mb), flanking (chr6:24-29.64 + 33.12-36 Mb), extended (chr6:24-36 Mb); coordinates based on hg19 reference assembly.

**Table S19. Frequency distribution of imputed MHC variants analyzed for association with psoriasis, cross-classified by reference panel source, MHC region and ancestry.**

| Reference panel source <sup>a</sup> | Classical MHC <sup>b</sup> |        |         | Flanking MHC <sup>b</sup> |        |         | Extended MHC <sup>b</sup> |        |         |
|-------------------------------------|----------------------------|--------|---------|---------------------------|--------|---------|---------------------------|--------|---------|
|                                     | SAS                        | EUR    | SAS+EUR | SAS                       | EUR    | SAS+EUR | SAS                       | EUR    | SAS+EUR |
| 1KGP                                | 32,242                     | 22,535 | 21,804  | 18,771                    | 7809   | 6901    | 51,013                    | 30,344 | 28,705  |
| HRC                                 | 22,744                     | 25,275 | 22,005  | 26,483                    | 26,136 | 19,782  | 49,227                    | 51,411 | 41,787  |
| SNP2HLA (5 gene)                    | 1163                       | 1149   | 1106    | 0                         | 0      | 0       | 1163                      | 1149   | 1106    |
| SNP2HLA (2 gene)                    | 102                        | 312    | 103     | 0                         | 0      | 0       | 102                       | 312    | 103     |
| SNP2HLA (1 gene)                    | 135                        | 136    | 131     | 0                         | 0      | 0       | 135                       | 136    | 131     |
| All                                 | 56,386                     | 49,407 | 45,149  | 45,254                    | 33,945 | 26,683  | 101,640                   | 83,352 | 71,832  |

Abbreviations: 1KGP, 1000 Genomes Project; HRC, Haplotype Reference Consortium; EUR, European; SAS, South Asian.

For multiallelic variants, all counts include both the number of biallelic splits and the number of sets of biallelic splits because these splits are tested both individually and jointly for association.

<sup>a</sup>For the 1KG and HRC reference panel sources frequency counts are means because the number of imputed variants tested for association from these two sources varies across the individual case-control studies. Three SNP2HLA reference panels were used for imputing HLA gene variants in the South Asian and European datasets; 5 gene, 2 gene and 1 gene refer, respectively, to the panels used to impute HLA-A/B/C/DQB1/DRB1, HLA-DPA1/DPB1, or HLA-DQA1 variants.

<sup>b</sup>MHC regions: classical (chr6:29.64-33.12 Mb), flanking (chr6:24-29.64 + 33.12-36 Mb), extended (chr6:24-36 Mb); coordinates based on hg19 reference assembly.

**Table S20. Frequency distribution of imputed MHC variants analyzed for association with psoriasis, cross-classified by minor allele frequency, imputation quality, MHC region and ancestry.**

| MHC region <sup>b</sup> | Ancestry | MAF <sup>a</sup> | No. variants with mean imputation quality <sup>a</sup> |           |           |           |           |           |           | Total  |
|-------------------------|----------|------------------|--------------------------------------------------------|-----------|-----------|-----------|-----------|-----------|-----------|--------|
|                         |          |                  | 0.70–0.75                                              | 0.75–0.80 | 0.80–0.85 | 0.85–0.90 | 0.90–0.95 | 0.95–0.99 | 0.99–1.00 |        |
| Classical               | SAS      | ≥ 0.05           | 494                                                    | 781       | 1257      | 2194      | 2556      | 5848      | 23,374    | 36,504 |
|                         |          | 0.01–0.05        | 71                                                     | 208       | 356       | 504       | 917       | 2164      | 5995      | 10,215 |
|                         |          | < 0.01           | 198                                                    | 530       | 797       | 960       | 1177      | 1943      | 3330      | 8935   |
|                         |          | Total            | 763                                                    | 1519      | 2410      | 3658      | 4650      | 9955      | 32,699    | 55,654 |
|                         | EUR      | ≥ 0.05           | 11                                                     | 107       | 367       | 961       | 2232      | 5725      | 22,041    | 31,444 |
|                         |          | 0.01–0.05        | 7                                                      | 55        | 177       | 344       | 758       | 2033      | 4969      | 8343   |
|                         |          | < 0.01           | 4                                                      | 59        | 273       | 589       | 1197      | 3081      | 3834      | 9037   |
|                         |          | Total            | 22                                                     | 221       | 817       | 1894      | 4187      | 10,839    | 30,844    | 48,824 |
|                         | SAS+EUR  | ≥ 0.05           | 8                                                      | 84        | 391       | 1027      | 2143      | 5832      | 21,594    | 31,079 |
|                         |          | 0.01–0.05        | 3                                                      | 35        | 111       | 276       | 658       | 2131      | 5436      | 8650   |
|                         |          | < 0.01           | 0                                                      | 17        | 72        | 180       | 592       | 1958      | 2062      | 4881   |
|                         |          | Total            | 11                                                     | 136       | 574       | 1483      | 3393      | 9921      | 29,092    | 44,610 |
| Flanking                | SAS      | ≥ 0.05           | 115                                                    | 315       | 585       | 1105      | 2208      | 7249      | 10,430    | 22,007 |
|                         |          | 0.01–0.05        | 131                                                    | 459       | 737       | 1043      | 1351      | 2896      | 3322      | 9939   |
|                         |          | < 0.01           | 470                                                    | 470       | 1985      | 2248      | 2525      | 2901      | 1674      | 12,273 |
|                         |          | Total            | 716                                                    | 1244      | 3307      | 4396      | 6084      | 13,046    | 15,426    | 44,219 |
|                         | EUR      | ≥ 0.05           | 15                                                     | 87        | 226       | 1391      | 2827      | 4209      | 7970      | 16,725 |
|                         |          | 0.01–0.05        | 6                                                      | 101       | 330       | 664       | 964       | 1939      | 1863      | 5867   |
|                         |          | < 0.01           | 6                                                      | 169       | 692       | 1769      | 2399      | 3922      | 2299      | 11,256 |
|                         |          | Total            | 27                                                     | 357       | 1248      | 3824      | 6190      | 10,070    | 12,132    | 33,848 |
|                         | SAS+EUR  | ≥ 0.05           | 6                                                      | 55        | 164       | 1143      | 2782      | 4496      | 7374      | 16,020 |
|                         |          | 0.01–0.05        | 1                                                      | 11        | 105       | 410       | 780       | 1888      | 1590      | 4785   |
|                         |          | < 0.01           | 0                                                      | 13        | 182       | 684       | 1054      | 2306      | 1565      | 5804   |
|                         |          | Total            | 7                                                      | 79        | 451       | 2237      | 4616      | 8690      | 10,529    | 26,609 |



Table S20. (Continued).

| MHC region <sup>b</sup> | Ancestry | MAF <sup>a</sup> | No. variants with mean imputation quality <sup>a</sup> |           |           |           |           |           |           | Total   |
|-------------------------|----------|------------------|--------------------------------------------------------|-----------|-----------|-----------|-----------|-----------|-----------|---------|
|                         |          |                  | 0.70–0.75                                              | 0.75–0.80 | 0.80–0.85 | 0.85–0.90 | 0.90–0.95 | 0.95–0.99 | 0.99–1.00 |         |
| Extended                | SAS      | ≥ 0.05           | 609                                                    | 1096      | 1842      | 3299      | 4764      | 13,097    | 33,804    | 58,511  |
|                         |          | 0.01–0.05        | 202                                                    | 667       | 1093      | 1547      | 2268      | 5060      | 9317      | 20,154  |
|                         |          | < 0.01           | 668                                                    | 1838      | 2782      | 3208      | 3702      | 4844      | 5004      | 22,046  |
|                         |          | Total            | 1479                                                   | 3601      | 5717      | 8054      | 10,734    | 23,001    | 48,125    | 100,711 |
|                         | EUR      | ≥ 0.05           | 26                                                     | 194       | 593       | 2352      | 5059      | 9934      | 30,011    | 48,169  |
|                         |          | 0.01–0.05        | 13                                                     | 156       | 507       | 1008      | 1722      | 3972      | 6832      | 14,210  |
|                         |          | < 0.01           | 10                                                     | 228       | 965       | 2358      | 3596      | 7003      | 6133      | 20,293  |
|                         |          | Total            | 49                                                     | 578       | 2065      | 5718      | 10,377    | 20,909    | 42,976    | 82,672  |
|                         | SAS+EUR  | ≥ 0.05           | 14                                                     | 139       | 555       | 2170      | 4925      | 10,328    | 28,968    | 47,099  |
|                         |          | 0.01–0.05        | 4                                                      | 46        | 216       | 686       | 1438      | 4019      | 7026      | 13,435  |
|                         |          | < 0.01           | 0                                                      | 30        | 254       | 864       | 1646      | 4264      | 3627      | 10,685  |
|                         |          | Total            | 18                                                     | 215       | 1025      | 3720      | 8009      | 18,611    | 39,621    | 71,219  |

Frequency counts are restricted to biallelic variants, including splits of multiallelic variants.

Abbreviations: EUR, European; MAF, minor allele frequency; SAS, South Asian.

<sup>a</sup>Membership in MAF and imputation quality bins based on the weighted mean of MAF and empirical imputation quality ( $R^2$ ) values, respectively, across studies in the ancestry group, with the effective sample size of each study as weights.

<sup>b</sup>MHC regions: classical (chr6:29.64–33.12 Mb), flanking (chr6:24–29.64 + 33.12–36 Mb), extended (chr6:24–36 Mb); coordinates based on hg19 reference assembly.

**Table S21. Frequency distribution of imputed MHC variants analyzed for association with psoriasis, cross-classified by variant type, MHC region and ethnic population.**

| Variant Type                     | Classical MHC <sup>a</sup> |        |         | Flanking MHC <sup>a</sup> |        |         | Extended MHC <sup>a</sup> |        |         |
|----------------------------------|----------------------------|--------|---------|---------------------------|--------|---------|---------------------------|--------|---------|
|                                  | SAS                        | EUR    | SAS+EUR | SAS                       | EUR    | SAS+EUR | SAS                       | EUR    | SAS+EUR |
| SNP                              | 50,513                     | 44,207 | 40,183  | 40,383                    | 31,178 | 24,292  | 90,896                    | 75,385 | 64,475  |
| Indel                            | 4828                       | 4280   | 4029    | 4844                      | 2755   | 2381    | 9672                      | 7035   | 6410    |
| Structural ( $\geq 50$ bp)       | 39                         | 31     | 29      | 27                        | 12     | 10      | 66                        | 43     | 39      |
| Multiallelic, split <sup>b</sup> | 3550                       | 2994   | 2809    | 1583                      | 916    | 793     | 5133                      | 3910   | 3602    |
| Multiallelic, full <sup>c</sup>  | 732                        | 583    | 539     | 197                       | 97     | 94      | 929                       | 680    | 613     |
| HLA 1-field allele               | 80                         | 78     | 72      | 0                         | 0      | 0       | 80                        | 78     | 72      |
| HLA 2-field allele               | 119                        | 107    | 83      | 0                         | 0      | 0       | 119                       | 107    | 83      |
| HLA amino acid                   | 807                        | 704    | 753     | 0                         | 0      | 0       | 807                       | 704    | 753     |
| HLA SNP                          | 7330                       | 5548   | 5193    | 0                         | 0      | 0       | 7330                      | 5548   | 5193    |
| HLA indel                        | 511                        | 380    | 373     | 0                         | 0      | 0       | 511                       | 380    | 373     |
| HLA protein-changing             | 1659                       | 1497   | 1483    | 0                         | 0      | 0       | 1659                      | 1497   | 1483    |
| non-HLA protein-changing         | 716                        | 628    | 522     | 531                       | 345    | 284     | 1247                      | 973    | 806     |
| All <sup>d</sup>                 | 56,386                     | 49,407 | 45,149  | 45,254                    | 33,945 | 26,683  | 101,640                   | 83,352 | 71,832  |

Abbreviations: EUR, European; Indel, insertion-deletion polymorphism; SAS, South Asian; SNP, single nucleotide polymorphism.

<sup>a</sup>MHC regions: classical (chr6:29.64-33.12 Mb), flanking (chr6:24-29.64 + 33.12-36 Mb), extended (chr6:24-36 Mb); coordinates based on hg19 reference assembly.

<sup>b</sup>Refers to the individual biallelic variants in the sets that result from splitting of multiallelic variants.

<sup>c</sup>Refers to the full sets of multiallelic variants.

<sup>d</sup>Total number of variants; less than the sum of all variant type counts because of overlap among some of the variant type categories.

**Table S22. Annotations and protein-changing surrogates for associated variants in the extended MHC region for people of South Asian ancestry.**

| Step <sup>a</sup> | Variant <sup>b</sup> | hg19 position <sup>c</sup> | nearest gene (consequence)               | Best protein-changing surrogate based on   |                                            |                                                             |                                           |
|-------------------|----------------------|----------------------------|------------------------------------------|--------------------------------------------|--------------------------------------------|-------------------------------------------------------------|-------------------------------------------|
|                   |                      |                            |                                          | LD <sup>d</sup> ( $W_n^2$ , rank)          | LD <sup>d</sup> ( $\epsilon'$ , rank)      | p-value <sup>e</sup> (p-value, rank)                        | Bayesian PP <sup>e</sup> (PP, rank)       |
| 1                 | <i>HLA-C*06</i>      | 31238192                   | <i>HLA-C</i><br>(protein)                | <i>HLA-C*06</i><br>(NA, 1)                 | <i>HLA-C*06</i><br>(NA, 1)                 | <i>HLA-C*06</i><br>( $1.3 \times 10^{-78}$ , 2)             | <i>HLA-C*06</i><br>(0.255, 2)             |
| 2                 | rs2428489            | 31352972                   | <i>AL645933.2</i><br>(9.1 kb downstream) | rs1051786 ( <i>MICA</i> )<br>(0.8349, 336) | rs1051786 ( <i>MICA</i> )<br>(0.6271, 183) | rs1051786 ( <i>MICA</i> )<br>( $1.7 \times 10^{-11}$ , 146) | rs1051786 ( <i>MICA</i> )<br>(0.000, 146) |
| 3                 | rs2442752            | 31351764                   | <i>AL671883.3</i><br>(7.9 kb downstream) | HLA-B aa-45<br>(0.3794, 75)                | HLA-B Lys45<br>(0.2733, 103)               | HLA-B aa-45<br>( $6.0 \times 10^{-6}$ , 6)                  | HLA-B aa-45<br>(0.005, 8)                 |
| 4                 | rs139451799          | 32454479                   | <i>HLA-DRB5</i><br>(31 kb downstream)    | HLA-DRB1 aa-13<br>(0.9705, 2)              | HLA-DRB1 Arg13<br>(0.9355, 2)              | HLA-DRB1 aa-142<br>( $2.9 \times 10^{-6}$ , 4)              | HLA-DRB1 aa-142<br>(0.008, 4)             |
| 5                 | rs9260313            | 29916885                   | <i>HLA-A</i><br>(3.2 kb downstream)      | HLA-A aa- 97<br>(0.8210, 2)                | HLA-A Met97<br>( 0.7023, 2)                | HLA-A Arg62<br>( $1.8 \times 10^{-5}$ , 31)                 | HLA-A Arg62<br>(0.005, 29)                |

Abbreviations: aa, amino acid; chr6, chromosome 6; LD, linkage disequilibrium; NA, not applicable, PP, posterior probability.

<sup>a</sup>Round of stepwise regression analysis.

<sup>b</sup>Build 151 dbSNP rsID when applicable,

<sup>c</sup>Base pair position in hg19 human reference; for classical HLA proteins the position of the center of the coding unit is given; for indels (all of which are insertions into the reference sequence), the position immediately before the insertion point is given.

<sup>d</sup> $W_n^2$  and  $\epsilon'$  coefficients of linkage disequilibrium can accommodate multiallelic variants; see Subjects and Methods for more details.

<sup>e</sup>P-values and Bayesian posterior probabilities based on the final full regression model for associated variants.

**Table S23. Parameters of 95% Bayesian credible sets for the five MHC psoriasis association signals in the final full regression model for people of South Asian ancestry.**

| Step <sup>a</sup> | Stepwise-selected variant |                            |       | Top variant in 95% BCS |                            |       | Size of 95% BCS |                         |                          |                     |
|-------------------|---------------------------|----------------------------|-------|------------------------|----------------------------|-------|-----------------|-------------------------|--------------------------|---------------------|
|                   | ID <sup>b</sup>           | chr6 position <sup>c</sup> | PP    | ID <sup>b</sup>        | chr6 position <sup>c</sup> | PP    | No. variants    | Left bound <sup>d</sup> | Right bound <sup>d</sup> | Length <sup>d</sup> |
| 1                 | <i>HLA-C*06</i>           | 31238192                   | 0.255 | rs12199223             | 31242731                   | 0.266 | 12              | 31155785                | 31269946                 | 114,162             |
| 2                 | rs2428489                 | 31352972                   | 0.003 | rs72657660             | 31363697                   | 0.075 | 31              | 31352972                | 31371101                 | 18,130              |
| 3                 | rs2442752                 | 31351764                   | 0.583 | rs2442752              | 31351764                   | 0.583 | 2868            | 30859268                | 31851354                 | 992,087             |
| 4                 | rs139451799               | 32454479                   | 0.013 | rs139451799            | 32454479                   | 0.013 | 571             | 32386554                | 32636433                 | 249,880             |
| 5                 | rs9260313                 | 29916885                   | 0.022 | rs9260313              | 29916885                   | 0.022 | 2587            | 29425584                | 30416864                 | 991,281             |

Abbreviations: BCS, Bayesian credible set; chr6, chromosome 6; PP, posterior probability.

<sup>a</sup>Round of stepwise regression analysis.

<sup>b</sup>ID is build 151 dbSNP rsID when applicable.

<sup>c</sup>Base pair position in hg19 human reference; for classical HLA proteins the position of the center of the coding unit is given; for indels (all of which are insertions into the reference sequence), the position immediately before the insertion point is given.

<sup>d</sup>All values are bp on chromosome 6 of the hg19 human reference assembly.

**Table S24. Psoriasis associations from stepwise analysis of the extended MHC region for eight studies of European ancestry.**

| Step <sup>a</sup> | Variant <sup>b</sup>    | chr6<br>position <sup>c</sup> | alleles           |         | risk allele frequency |          | association at<br>entry into model |                        | association in<br>final full model |                        | V <sub>g</sub>  |
|-------------------|-------------------------|-------------------------------|-------------------|---------|-----------------------|----------|------------------------------------|------------------------|------------------------------------|------------------------|-----------------|
|                   |                         |                               | risk <sup>d</sup> | nonrisk | cases                 | controls | OR (95% CI)                        | p-value                | OR (95% CI)                        | p-value                |                 |
| 1                 | rs12211087              | 31269946                      | A                 | T       | 0.2470                | 0.0915   | 3.93 (3.75-4.13)                   | $2.7 \times 10^{-659}$ | NA <sup>e</sup>                    | NA <sup>e</sup>        | NA <sup>e</sup> |
|                   |                         |                               | C,F,M,Y           | S       | NA                    | NA       | NA                                 | $1.3 \times 10^{-85}$  | NA                                 | $8.1 \times 10^{-75}$  | 0.00913         |
|                   |                         |                               | C                 | other   | 0.1476                | 0.1185   | 1.53 (1.45-1.61)                   | $5.1 \times 10^{-57}$  | 1.65 (1.55-1.75)                   | $1.4 \times 10^{-55}$  | NA              |
| 2                 | HLA-B<br>amino acid 67  | 31324536                      | F                 | other   | 0.2049                | 0.2586   | 1.07 (1.02-1.12)                   | 0.0025                 | 1.17 (1.11-1.23)                   | $1.9 \times 10^{-8}$   | NA              |
|                   |                         |                               | M                 | other   | 0.1277                | 0.0449   | 1.57 (1.46-1.69)                   | $1.1 \times 10^{-34}$  | 1.61 (1.47-1.75)                   | $3.3 \times 10^{-27}$  | NA              |
|                   |                         |                               | Y                 | other   | 0.1202                | 0.1601   | 1.00 (0.95-1.05)                   | 0.97                   | 1.15 (1.05-1.25)                   | 0.0014                 | NA              |
|                   |                         |                               | other             | S       | 0.6004                | 0.5821   | ref                                | ref                    | ref                                | ref                    | NA              |
| 3                 | rs1655901               | 29916804                      | C                 | T       | 0.5915                | 0.5187   | 1.35 (1.30-1.39)                   | $3.3 \times 10^{-64}$  | 1.36 (1.32-1.41)                   | $1.4 \times 10^{-65}$  | 0.00739         |
| 4                 | rs72866766              | 31321184                      | C                 | T       | 0.1093                | 0.0858   | 1.34 (1.26-1.43)                   | $4.8 \times 10^{-21}$  | 1.47 (1.37-1.57)                   | $3.7 \times 10^{-29}$  | 0.00382         |
| 5                 | rs4947340               | 32435338                      | T                 | C       | 0.4586                | 0.3756   | 1.15 (1.11-1.19)                   | $1.6 \times 10^{-14}$  | 1.17 (1.13-1.22)                   | $1.5 \times 10^{-15}$  | 0.00182         |
|                   |                         |                               | C,T               | –       | NA                    | NA       | NA                                 | $5.0 \times 10^{-12}$  | NA                                 | $7.7 \times 10^{-13}$  | 0.00226         |
| 6                 | rs137854633             | 31324851                      | C                 | other   | 0.3941                | 0.4545   | 1.09 (1.04-1.14)                   | $1.1 \times 10^{-4}$   | 1.17 (1.11-1.23)                   | $1.3 \times 10^{-9}$   | NA              |
|                   |                         |                               | T                 | other   | 0.0702                | 0.0253   | 1.45 (1.30-1.61)                   | $1.1 \times 10^{-11}$  | 1.37 (1.23-1.52)                   | $1.7 \times 10^{-8}$   | NA              |
|                   |                         |                               | other             | –       | 0.4642                | 0.4799   | ref                                | ref                    | ref                                | ref                    | NA              |
| 7                 | HLA-B<br>amino acid 171 | 31323979                      | Y                 | H       | 0.8938                | 0.8639   | 1.18 (1.12-1.24)                   | $1.4 \times 10^{-9}$   | 1.24 (1.17-1.31)                   | $4.9 \times 10^{-14}$  | 0.00164         |
| 8                 | rs6935999               | 32392757                      | A                 | G       | 0.0195                | 0.0138   | 1.59 (1.39-1.82)                   | $1.8 \times 10^{-11}$  | 1.57 (1.37-1.80)                   | $9.7 \times 10^{-11}$  | 0.00093         |
| 9                 | HLA-C*06:02             | 31238192                      | C*06:02           | other   | 0.2478                | 0.0902   | 2.16 (1.66-2.80)                   | $7.7 \times 10^{-9}$   | 2.80 (2.59-3.03)                   | $6.4 \times 10^{-146}$ | 0.03006         |
| 10                | rs75881311              | 31102273                      | T                 | other   | 0.9961                | 0.9944   | 2.39 (1.82-3.14)                   | $4.3 \times 10^{-10}$  | 2.19 (1.64-2.91)                   | $7.5 \times 10^{-8}$   | 0.00096         |
| 11                | rs371194629             | 29798581                      | –                 | 14mer   | 0.5803                | 0.5839   | 1.11 (1.07-1.15)                   | $3.9 \times 10^{-9}$   | 1.13 (1.09-1.17)                   | $2.0 \times 10^{-11}$  | 0.00117         |
| 12                | rs41543814              | 31239430                      | C                 | T       | 0.6616                | 0.5793   | 1.13 (1.08-1.18)                   | $7.4 \times 10^{-8}$   | 1.20 (1.14-1.27)                   | $1.2 \times 10^{-12}$  | 0.00259         |
| 13                | rs147145279             | 31388958                      | AA                | other   | 0.0023                | 0.0009   | 2.95 (1.91-4.57)                   | $1.2 \times 10^{-6}$   | 3.00 (1.94-4.64)                   | $8.5 \times 10^{-7}$   | 0.00042         |
| 14                | rs1128175               | 31150435                      | G                 | A       | 0.8272                | 0.7702   | 1.18 (1.10-1.26)                   | $3.3 \times 10^{-6}$   | 1.20 (1.12-1.29)                   | $1.9 \times 10^{-7}$   | 0.00187         |
| 15                | HLA-DQA1 Arg52          | 32609228                      | other             | R       | 0.6040                | 0.5466   | 1.09 (1.05-1.13)                   | $1.1 \times 10^{-5}$   | 1.09 (1.05-1.13)                   | $1.1 \times 10^{-5}$   | 0.00057         |

Abbreviations: chr6, chromosome 6; CI, confidence interval; NA, not applicable; OR, odds ratio; ref, reference; V<sub>g</sub>, variance in liability explained by the genetic variant.<sup>16</sup>

<sup>a</sup>Round of stepwise regression analysis.

<sup>b</sup>Variant notes: variant ID is build 151 dbSNP rsID when applicable; HLA-C\*06:02 is one biallelic split from a decomposed set of 41 classical 2-field HLA-C alleles; the stepwise-selected variant for triallelic SNP rs75881311 is one of its biallelic splits with G/A+T alleles; rs147145279 is shorthand for two biallelic

indels (rs559509014 and rs147145279) that were genotyped as a single triallelic indel by phase 3 1000 Genomes with –, A and AA alleles, and the stepwise-selected variant is one of the biallelic splits of this triallelic indel; HLA-DQA1 Arg52 is a biallelic split (R/H+S alleles) of a triallelic amino acid variant.

<sup>c</sup>Base pair position in hg19 human reference; for amino acids and classical HLA proteins the position of the center of the coding unit is given; for indels (all of which are insertions into the reference sequence), the position immediately before the insertion point is given.

<sup>d</sup>Risk allele is based on final full regression model.

<sup>e</sup>Variant removed after addition of *HLA-C\*06:02* in ninth round reduced its significance below the backward elimination inclusion threshold.

**Table S25. Annotations and protein-changing surrogates for associated variants in the extended MHC region for people of European ancestry.**

| Step <sup>a</sup> | Variant <sup>b</sup>     | hg19 position <sup>c</sup> | nearest gene (consequence)            | Best protein-changing surrogate based on     |                                              |                                                             |                                           |
|-------------------|--------------------------|----------------------------|---------------------------------------|----------------------------------------------|----------------------------------------------|-------------------------------------------------------------|-------------------------------------------|
|                   |                          |                            |                                       | LD <sup>d</sup> ( $W_{n,2}^2$ , rank)        | LD <sup>d</sup> ( $\epsilon'$ , rank)        | p-value <sup>e</sup> (p-value, rank)                        | Bayesian PP <sup>e</sup> (PP, rank)       |
| 1                 | rs12211087               | 31269946                   | <i>LINC02571</i><br>(527 bp upstream) | <i>HLA-C*06</i><br>(0.9897, 5)               | <i>HLA-C*06</i><br>(0.9773, 5)               | NA                                                          | NA                                        |
| 2                 | HLA-B aa-67              | 31324536                   | <i>HLA-B</i><br>(protein)             | HLA-B aa-67<br>(NA, 1)                       | HLA-B aa-67<br>(NA, 1)                       | HLA-B aa-67<br>( $8.1 \times 10^{-75}$ , 1)                 | HLA-B aa-67<br>(1.000, 1)                 |
| 3                 | rs1655901                | 29916804                   | <i>HLA-A</i><br>(3.1 kb downstream)   | HLA-A aa-62<br>(0.5049, 48)                  | HLA-A Val99<br>(0.3705, 99)                  | HLA-A aa-95<br>( $9.3 \times 10^{-48}$ , 7)                 | HLA-A aa-95<br>(0.000, 7)                 |
| 4                 | rs72866766               | 31321184                   | <i>HLA-B</i><br>(468 bp downstream)   | HLA-B aa-158<br>(0.4424, 14)                 | HLA-B aa-158<br>(0.4601, 12)                 | HLA-B aa- 97<br>( $2.8 \times 10^{-23}$ , 2)                | HLA-B aa-97<br>(0.000, 2)                 |
| 5                 | rs4947340                | 32435338                   | <i>HLA-DRA</i><br>(23 kb downstream)  | HLA-DRB1 aa-13<br>(0.8585, 2)                | HLA-DQA1 Glu175<br>(0.7484, 2)               | HLA-DRB1 aa-104<br>( $5.0 \times 10^{-12}$ , 47)            | HLA-DRB1 aa-98<br>(0.000, 47)             |
| 6                 | rs137854633              | 31324851                   | <i>HLA-B</i><br>(intron)              | HLA-B*13<br>(0.9976, 15)                     | HLA-B aa-10<br>(0.5509, 4)                   | HLA-B aa-10<br>( $1.9 \times 10^{-11}$ , 5)                 | HLA-B aa-10<br>(0.033, 5)                 |
| 7                 | HLA-B aa-171             | 31323979                   | <i>HLA-B</i><br>(protein)             | HLA-B aa-171<br>(NA, 1)                      | HLA-B aa-171<br>(NA, 1)                      | HLA-B aa-171<br>( $4.9 \times 10^{-14}$ , 1)                | HLA-B aa-171<br>(0.996, 1)                |
| 8                 | rs6935999                | 32392757                   | <i>HLA-DRA</i><br>(15 kb upstream)    | HLA-DRB1*01:02<br>(0.8376, 13)               | HLA-DRB1*01:02<br>(0.8365, 10)               | HLA-DRB1*01:02<br>( $1.8 \times 10^{-8}$ , 20)              | HLA-DRB1*01:02<br>(0.005, 20)             |
| 9                 | HLA-C*06:02              | 31238192                   | <i>HLA-C</i><br>(protein)             | <i>HLA-C*06:02</i><br>(NA, 1)                | <i>HLA-C*06:02</i><br>(NA, 1)                | <i>HLA-C*06:02</i><br>( $6.4 \times 10^{-146}$ , 2)         | <i>HLA-C*06:02</i><br>(0.288, 2)          |
| 10                | rs75881311               | 31102273                   | <i>PSORS1C1</i><br>(intron)           | rs115749638 ( <i>MUCL3</i> )<br>(0.2173, 12) | rs115749638 ( <i>MUCL3</i> )<br>(0.2812, 12) | HLA-B aa-97<br>( $4.4 \times 10^{-5}$ , 22)                 | <i>HLA-B*39:01</i><br>(0.000, 17)         |
| 11                | rs371194629              | 29798581                   | <i>HLA-G</i><br>(3'-UTR)              | rs9260156 ( <i>HLA-A</i> )<br>(0.6027, 420)  | HLA-A Arg163<br>(0.5091, 387)                | HLA-A Val95<br>( $3.0 \times 10^{-9}$ , 93)                 | HLA-A Val95<br>(0.000, 93)                |
| 12                | rs41543814               | 31239430                   | <i>HLA-C</i><br>(protein)             | rs41543814 ( <i>HLA-C</i> )<br>(NA, 1)       | rs41543814 ( <i>HLA-C</i> )<br>(NA, 1)       | rs41543814 ( <i>HLA-C</i> )<br>( $1.2 \times 10^{-12}$ , 1) | rs41543814 ( <i>HLA-C</i> )<br>(0.992, 1) |
| 13                | rs147145279 <sup>f</sup> | 31388958                   | <i>HCP5</i><br>(intron)               | rs41556715 ( <i>MICA</i> )<br>(0.9505, 4)    | rs41556715 ( <i>MICA</i> )<br>(0.9474, 4)    | rs41556715 ( <i>MICA</i> )<br>( $5.3 \times 10^{-6}$ , 14)  | rs41556715 ( <i>MICA</i> )<br>(0.025, 11) |
| 14                | rs1128175                | 31150435                   | <i>POU5F1</i><br>(1.9 kb upstream)    | HLA-C aa-99<br>(0.8454, 3)                   | rs3130981 ( <i>CDSN</i> )<br>(0.6574, 14)    | HLA-C aa-99<br>( $1.3 \times 10^{-6}$ , 6)                  | HLA-C Cys99<br>(0.011, 11)                |
| 15                | HLA-DQA1 Arg52           | 32609228                   | <i>HLA-DQA1</i><br>(protein)          | HLA-DQA1 Arg52<br>(NA, 1)                    | HLA-DQA1 Arg52<br>(NA, 1)                    | HLA-DQA1 Arg52<br>( $1.1 \times 10^{-5}$ , 1)               | HLA-DQA1 Arg52<br>(0.048, 1)              |

Abbreviations: aa, amino acid; chr6, chromosome 6; LD, linkage disequilibrium; NA, not applicable, PP, posterior probability.

<sup>a</sup>Round of stepwise regression analysis.

<sup>b</sup>Build 151 dbSNP rsID when applicable

<sup>c</sup>Base pair position in hg19 human reference; for classical HLA proteins the position of the center of the coding unit is given; for indels (all of which are insertions into the reference sequence), the position immediately before the insertion point is given.

<sup>d</sup> $W_n^2$  and  $\varepsilon'$  coefficients of linkage disequilibrium can accommodate multiallelic variants; see Subjects and Methods for more details.

<sup>e</sup>P-values and Bayesian posterior probabilities based on the final full regression model for associated variants.

<sup>f</sup>rs147145279 is shorthand for two biallelic indels (rs559509014 and rs147145279) that were genotyped as a single triallelic indel by phase 3 1000 Genomes Project with –, A and AA alleles, and the stepwise-selected variant is one of the biallelic splits of this triallelic indel.



**Table S26. Parameters of 95% Bayesian credible sets for the 14 MHC psoriasis association signals in the final full regression model for people of European ancestry.**

| Step <sup>a</sup> | Stepwise-selected variant |                            |       | Top variant in 95% BCS   |                            |       | Size of 95% BCS |                         |                          |                     |
|-------------------|---------------------------|----------------------------|-------|--------------------------|----------------------------|-------|-----------------|-------------------------|--------------------------|---------------------|
|                   | ID <sup>b</sup>           | chr6 position <sup>c</sup> | PP    | ID <sup>b</sup>          | chr6 position <sup>c</sup> | PP    | No. variants    | Left bound <sup>d</sup> | Right bound <sup>d</sup> | Length <sup>d</sup> |
| 2                 | HLA-B aa-67               | 31324536                   | 1.000 | HLA-B aa-67              | 31324536                   | 1.000 | 1               | 31324535                | 31324537                 | 3                   |
| 3                 | rs1655901                 | 29916804                   | 1.000 | rs1655901                | 29916804                   | 1.000 | 1               | 29916804                | 29916804                 | 1                   |
| 4                 | rs72866766                | 31321184                   | 1.000 | rs72866766               | 31321184                   | 1.000 | 1               | 31321184                | 31321184                 | 1                   |
| 5                 | rs4947340                 | 32435338                   | 0.965 | rs4947340                | 32435338                   | 0.965 | 1               | 32435338                | 32435338                 | 1                   |
| 6                 | rs137854633               | 31324851                   | 0.543 | rs137854633              | 31324851                   | 0.543 | 7               | 31324851                | 31325932                 | 1082                |
| 7                 | HLA-B aa-171              | 31323979                   | 0.996 | HLA-B aa-171             | 31323979                   | 0.996 | 1               | 31323978                | 31323980                 | 3                   |
| 8                 | rs6935999                 | 32392757                   | 0.752 | rs6935999                | 32392757                   | 0.752 | 18              | 32384283                | 32681927                 | 297,645             |
| 9                 | <i>HLA-C*06:02</i>        | 31238192                   | 0.288 | rs12189871               | 31251924                   | 0.712 | 2               | 31236526                | 31251924                 | 15,399              |
| 10                | rs75881311                | 31102273                   | 0.217 | rs75881311               | 31102273                   | 0.217 | 23              | 30968398                | 31495960                 | 527,563             |
| 11                | rs371194629               | 29798581                   | 0.022 | rs1736927                | 29796115                   | 0.033 | 47              | 29784514                | 29820218                 | 35,705              |
| 12                | rs41543814                | 31239430                   | 0.992 | rs41543814               | 31239430                   | 0.992 | 1               | 31239430                | 31239430                 | 1                   |
| 13                | rs147145279 <sup>e</sup>  | 31388958                   | 0.124 | rs147145279 <sup>e</sup> | 31388959                   | 0.124 | 1852            | 30890201                | 31884909                 | 994,709             |
| 14                | rs1128175                 | 31150435                   | 0.180 | rs1128175                | 31150435                   | 0.180 | 662             | 30666027                | 31646746                 | 980,720             |
| 15                | HLA-DQA1 Arg52            | 32609228                   | 0.048 | HLA-DQA1 Arg52           | 32609228                   | 0.048 | 6766            | 32109547                | 33108809                 | 999,263             |

Abbreviations: aa, amino acid; BCS, Bayesian credible set; chr6, chromosome 6; PP, posterior probability.

<sup>a</sup>Round of stepwise regression analysis.

<sup>b</sup>ID is build 151 dbSNP rsID when applicable.

<sup>c</sup>Base pair position in hg19 human reference; for amino acids and classical HLA proteins the position of the center of the coding unit is given; for indels (all of which are insertions into the reference sequence), the position immediately before the insertion point is given.

<sup>d</sup>All values are bp on chromosome 6 of the hg19 human reference assembly.

<sup>e</sup>rs147145279 is shorthand for two biallelic indels (rs559509014 and rs147145279) that were genotyped as a single triallelic indel by phase 3 1000 Genomes Project with –, A and AA alleles, and the stepwise-selected variant is one of the biallelic splits of this triallelic indel.

**Table S27. Psoriasis associations from stepwise analysis of the extended MHC region for ten studies of South Asian or European ancestry.**

| Step <sup>a</sup> | Variant <sup>b</sup>   | chr6<br>position <sup>c</sup> | alleles           |         | risk allele frequency |          | association at<br>entry into model |                        | association in<br>final full model |                        |
|-------------------|------------------------|-------------------------------|-------------------|---------|-----------------------|----------|------------------------------------|------------------------|------------------------------------|------------------------|
|                   |                        |                               | risk <sup>d</sup> | nonrisk | cases                 | controls | OR (95% CI)                        | p-value                | OR (95% CI)                        | p-value                |
| 1                 | rs12211087             | 31269946                      | A                 | T       | 0.2593                | 0.0921   | 4.09 (3.90-4.28)                   | $5.3 \times 10^{-779}$ | NA <sup>e</sup>                    | NA <sup>e</sup>        |
|                   |                        |                               | C,M,Y             | F,S     | NA                    | NA       | NA                                 | $3.0 \times 10^{-94}$  | NA                                 | $1.3 \times 10^{-134}$ |
|                   |                        |                               | C                 | other   | 0.1363                | 0.1148   | 1.55 (1.47-1.63)                   | $5.3 \times 10^{-64}$  | 1.98 (1.86-2.10)                   | $4.0 \times 10^{-105}$ |
| 2                 | HLA-B<br>amino acid 67 | 31324536                      | other             | F       | 0.7957                | 0.7404   | 0.93 (0.89-0.97)                   | $6.2 \times 10^{-4}$   | 1.04 (0.98-1.10)                   | 0.22                   |
|                   |                        |                               | M                 | other   | 0.1445                | 0.0485   | 1.55 (1.45-1.66)                   | $3.3 \times 10^{-39}$  | 1.30 (1.20-1.40)                   | $1.3 \times 10^{-11}$  |
|                   |                        |                               | Y                 | other   | 0.1125                | 0.1550   | 1.03 (0.98-1.08)                   | 0.31                   | 1.25 (1.18-1.33)                   | $1.3 \times 10^{-13}$  |
|                   |                        |                               | other             | S       | 0.5974                | 0.5779   | ref                                | ref                    | ref                                | ref                    |
| 3                 | rs1655901              | 29916804                      | C                 | T       | 0.5882                | 0.5151   | 1.35 (1.31-1.39)                   | $3.5 \times 10^{-72}$  | 1.30 (1.25-1.34)                   | $1.0 \times 10^{-49}$  |
| 4                 | rs2734588              | 31496467                      | other             | C       | 0.2036                | 0.1659   | 1.24 (1.19-1.30)                   | $5.9 \times 10^{-24}$  | 1.11 (1.06-1.17)                   | $6.5 \times 10^{-6}$   |
| 5                 | rs2853998              | 31327164                      | T                 | C       | 0.7081                | 0.6544   | 1.17 (1.12-1.22)                   | $1.0 \times 10^{-13}$  | 1.17 (1.12-1.23)                   | $3.1 \times 10^{-12}$  |
| 6                 | rs114811870            | 31324938                      | C                 | T       | 0.9738                | 0.9669   | 1.50 (1.35-1.67)                   | $1.7 \times 10^{-13}$  | 1.91 (1.69-2.15)                   | $3.0 \times 10^{-25}$  |
| 7                 | rs28573770             | 32679275                      | A                 | T       | 0.0146                | 0.0108   | 1.90 (1.62-2.24)                   | $3.6 \times 10^{-15}$  | 1.72 (1.46-2.02)                   | $5.5 \times 10^{-11}$  |
| 8                 | HLA-C*06:02            | 31238192                      | C*06:02           | other   | 0.2601                | 0.0908   | 2.25 (1.76-2.88)                   | $1.5 \times 10^{-10}$  | 3.18 (2.95-3.43)                   | $3.2 \times 10^{-200}$ |
| 9                 | rs2844626              | 31229552                      | T                 | A       | 0.4995                | 0.3626   | 1.18 (1.12-1.24)                   | $5.9 \times 10^{-10}$  | 1.20 (1.14-1.26)                   | $1.8 \times 10^{-11}$  |
| 10                | rs1736927              | 29796115                      | A                 | C       | 0.4718                | 0.4863   | 1.11 (1.07-1.15)                   | $2.3 \times 10^{-9}$   | 1.10 (1.06-1.14)                   | $5.5 \times 10^{-8}$   |
| 11                | rs9271539              | 32590028                      | G                 | A       | 0.7165                | 0.6610   | 1.11 (1.07-1.15)                   | $6.8 \times 10^{-8}$   | 1.17 (1.12-1.21)                   | $1.7 \times 10^{-15}$  |
| 12                | rs9378158              | 31305761                      | G                 | A       | 0.0647                | 0.0676   | 1.19 (1.11-1.27)                   | $2.7 \times 10^{-7}$   | 1.16 (1.09-1.24)                   | $9.9 \times 10^{-6}$   |
| 13                | rs112540072            | 32338289                      | G                 | A       | 0.9481                | 0.9266   | 1.20 (1.12-1.28)                   | $2.4 \times 10^{-7}$   | 1.19 (1.11-1.27)                   | $1.2 \times 10^{-6}$   |
| 14                | rs566864214            | 31480770                      | A                 | G       | 0.9964                | 0.9945   | 1.87 (1.46-2.40)                   | $6.3 \times 10^{-7}$   | 1.94 (1.51-2.48)                   | $1.7 \times 10^{-7}$   |
| 15                | rs9266716              | 31349727                      | T                 | C       | 0.7259                | 0.7149   | 1.13 (1.08-1.18)                   | $5.8 \times 10^{-7}$   | 1.14 (1.09-1.20)                   | $1.0 \times 10^{-7}$   |
| 16                | rs147145279            | 31388958                      | AA                | other   | 0.0021                | 0.0009   | 2.74 (1.78-4.21)                   | $4.7 \times 10^{-6}$   | 2.78 (1.80-4.28)                   | $3.5 \times 10^{-6}$   |
| 17                | rs12660712             | 29734634                      | C                 | A       | 0.9756                | 0.9679   | 1.24 (1.12-1.36)                   | $2.7 \times 10^{-5}$   | 1.24 (1.12-1.37)                   | $2.2 \times 10^{-5}$   |
| 18                | rs3104406              | 32682443                      | A                 | G       | 0.4881                | 0.3971   | 1.08 (1.04-1.12)                   | $2.2 \times 10^{-5}$   | 1.08 (1.04-1.12)                   | $2.2 \times 10^{-5}$   |

Abbreviations: chr6, chromosome 6; CI, confidence interval; NA, not applicable; OR, odds ratio; PP, posterior probability (Bayesian); ref, reference.

<sup>a</sup>Round of stepwise regression analysis.

<sup>b</sup>Variant notes: variant ID is build 151 dbSNP rsID when applicable; the stepwise-selected variant for triallelic SNP rs2734588 is one of its biallelic splits with C/A+G alleles; HLA-C\*06:02 is one biallelic split from decomposed sets of 74 and 41 classical 2-field HLA-C alleles for the South Asian and European studies, respectively; rs147145279 is shorthand for two biallelic indels (rs559509014 and rs147145279) that were genotyped as a single triallelic indel by phase 3 1000 Genomes Project with -, A and AA alleles, and the stepwise-selected variant is one of the biallelic splits of this triallelic indel.

<sup>c</sup>Base pair position in hg19 human reference; for amino acids and classical HLA proteins the position of the center of the coding unit is given; for indels (all of which are insertions into the reference sequence), the position immediately before the insertion point is given.

<sup>d</sup>Risk allele is based on final full regression model.

<sup>e</sup>Variant removed after addition of HLA-C\*06:02 in eighth round reduced its significance below the backward elimination inclusion threshold.

**Table S28. Annotations and protein-changing surrogates for associated variants in the extended MHC region for people of South Asian or European ancestry.**

| Step <sup>a</sup> | Variant <sup>b</sup> | hg19 position <sup>c</sup> | nearest gene (consequence)          | Best protein-changing surrogate based on |                                              |                                          |                                              |                                                           |                                           |
|-------------------|----------------------|----------------------------|-------------------------------------|------------------------------------------|----------------------------------------------|------------------------------------------|----------------------------------------------|-----------------------------------------------------------|-------------------------------------------|
|                   |                      |                            |                                     | LD in EUR <sup>d</sup> ( $W_n^2$ , rank) | LD in EUR <sup>d</sup> ( $\epsilon'$ , rank) | LD in SAS <sup>d</sup> ( $W_n^2$ , rank) | LD in SAS <sup>d</sup> ( $\epsilon'$ , rank) | p-value <sup>e</sup> (p-value, rank)                      | Bayesian PP <sup>e</sup> (PP, rank)       |
| 1                 | rs12211087           | 31269946                   | <i>LINC02571</i> (527 bp upstream)  | <i>HLA-C*06</i> (0.9897, 5)              | <i>HLA-C*06</i> (0.9773, 5)                  | <i>HLA-C*06</i> (0.9861, 5)              | <i>HLA-C*06</i> (0.9686, 5)                  | NA                                                        | NA                                        |
| 2                 | HLA-B aa-67          | 31324536                   | <i>HLA-B</i> (protein)              | HLA-B aa-67 (NA, 1)                      | HLA-B aa-67 (NA, 1)                          | HLA-B aa-67 (NA, 1)                      | HLA-B aa-67 (NA, 1)                          | HLA-B aa-67 ( $1.3 \times 10^{-134}$ , 1)                 | HLA-B aa-67 (1.000, 1)                    |
| 3                 | rs1655901            | 29916804                   | HLA-A (3.1 kb downstream)           | HLA-A aa-62 (0.5049, 48)                 | HLA-A Val95 (0.3705, 100)                    | HLA-A aa-62 (0.5563, 12)                 | HLA-A Ala152 (0.5702, 39)                    | HLA-A Glu62 ( $9.0 \times 10^{-40}$ , 4)                  | HLA-A Glu62 (0.000, 4)                    |
| 4                 | rs2734588            | 31496467                   | <i>MCCD1</i> (272 bp upstream)      | HLA-C aa-156 (0.2110, 154)               | HLA-B*13:02 (0.1933, 173)                    | rs28399976 ( <i>MSH5</i> ) (0.1715, 161) | rs28399976 ( <i>MSH5</i> ) (0.1875, 116)     | rs2229094 ( <i>LTA</i> ) ( $8.7 \times 10^{-5}$ , 42)     | rs144223778 ( <i>HSPA1B</i> ) (0.001, 39) |
| 5                 | rs2853998            | 31327164                   | <i>HLA-B</i> (2.2 kb upstream)      | HLA-B aa-9 (0.5429, 2)                   | HLA-B His9 (0.5019, 2)                       | HLA-B aa-9 (0.7884, 2)                   | HLA-B His9 (0.7329, 2)                       | HLA-B Asp9 ( $9.9 \times 10^{-11}$ , 2)                   | HLA-B aa-9 (0.034, 2)                     |
| 6                 | rs114811870          | 31324938                   | <i>HLA-B</i> (5'-UTR)               | HLA-C*08 (0.9419, 10)                    | HLA-C*08 (0.9195, 10)                        | rs41560824 ( <i>MICA</i> ) (0.7998, 21)  | rs41560824 ( <i>MICA</i> ) (0.8322, 21)      | rs41556417 ( <i>HLA-B</i> ) ( $2.6 \times 10^{-21}$ , 13) | rs41556417 ( <i>HLA-B</i> ) (0.000, 13)   |
| 7                 | rs28573770           | 32679275                   | <i>AL662789.1</i> (6.5 kb upstream) | rs140654840 ( <i>TAP2</i> ) (0.6124, 47) | rs140654840 ( <i>TAP2</i> ) (0.6411, 34)     | rs140654840 ( <i>TAP2</i> ) (0.7140, 23) | rs140654840 ( <i>TAP2</i> ) (0.7627, 22)     | rs16870005 ( <i>TSBP1</i> ) ( $6.5 \times 10^{-9}$ , 28)  | rs16870005 ( <i>TSBP1</i> ) (0.001, 28)   |
| 8                 | <i>HLA-C*06:02</i>   | 31238192                   | <i>HLA-C</i> (protein)              | <i>HLA-C*06:02</i> (NA, 1)               | <i>HLA-C*06:02</i> (NA, 1)                   | <i>HLA-C*06:02</i> (NA, 1)               | <i>HLA-C*06:02</i> (NA, 1)                   | <i>HLA-C*06:02</i> ( $3.2 \times 10^{-200}$ , 2)          | <i>HLA-C*06:02</i> (0.664, 1)             |
| 9                 | rs2844626            | 31229552                   | <i>HLA-C</i> (7.0 kb downstream)    | rs1576 ( <i>CCHCR1</i> ) (0.5764, 49)    | rs1576 ( <i>CCHCR1</i> ) (0.4794, 51)        | rs1576 ( <i>CCHCR1</i> ) (0.5713, 50)    | rs2308592 ( <i>HLA-C</i> ) (0.4905, 72)      | <i>HLA-B*51</i> ( $9.8 \times 10^{-11}$ , 2)              | <i>HLA-B*51</i> (0.106, 2)                |
| 10                | rs1736927            | 29796115                   | <i>HLA-G</i> (intron)               | rs9260156 ( <i>HLA-A</i> ) (0.6659, 97)  | HLA-A Leu156 (0.5826, 108)                   | HLA-A aa-95 (0.5352, 184)                | HLA-A Val95 (0.5083, 176)                    | rs543623321 ( <i>HLA-A</i> ) ( $2.6 \times 10^{-7}$ , 86) | rs543623321 ( <i>HLA-A</i> ) (0.003, 84)  |
| 11                | rs9271539            | 32590028                   | <i>HLA-DQA1</i> (15.1 kb upstream)  | HLA-DRB1 aa-233 (0.8311, 3)              | HLA-DRB1 aa-233 (0.7739, 3)                  | HLA-DRB1 aa-13 (0.8799, 3)               | HLA-DRB1 Ser12 (e=0.80368, 3)                | HLA-DRB1 aa-13 ( $7.5 \times 10^{-12}$ , 4)               | HLA-DRB1 aa-13 (0.000, 4)                 |
| 12                | rs9378158            | 31305761                   | <i>HLA-B</i> (15.9 kb downstream)   | HLA-C aa-156 (0.2674, 173)               | <i>HLA-C*07:04</i> (0.2961, 240)             | <i>HLA-B*15</i> (0.3347, 141)            | <i>HLA-C*07:01</i> (0.3244, 146)             | <i>HLA-C*07:01</i> ( $2.5 \times 10^{-5}$ , 6)            | <i>HLA-C*07:01</i> (0.016, 6)             |

Table S28. (Continued).

| Step <sup>a</sup> | Variant <sup>b</sup>     | hg19 position <sup>c</sup> | nearest gene (consequence)            | Best protein-changing surrogate based on        |                                                 |                                                 |                                                 |                                                                   |                                                |
|-------------------|--------------------------|----------------------------|---------------------------------------|-------------------------------------------------|-------------------------------------------------|-------------------------------------------------|-------------------------------------------------|-------------------------------------------------------------------|------------------------------------------------|
|                   |                          |                            |                                       | LD in EUR <sup>d</sup> ( $W_n^2$ , rank)        | LD in EUR <sup>d</sup> ( $\epsilon'$ , rank)    | LD in SAS <sup>d</sup> ( $W_n^2$ , rank)        | LD in SAS <sup>d</sup> ( $\epsilon'$ , rank)    | p-value <sup>e</sup> (p-value, rank)                              | Bayesian PP <sup>e</sup> (PP, rank)            |
| 13                | rs112540072              | 32338289                   | <i>TSBP1</i> (intron)                 | <i>HLA-DRB1*01:01</i><br>(0.4935, 31)           | <i>HLA-DRB1*01:01</i><br>(0.4653, 45)           | HLA-DRB1 aa-30<br>(0.6365, 17)                  | <i>HLA-DRB1*01:01</i><br>(0.6330, 17)           | <i>HLA-DRB1*01:01</i><br>( $5.2 \times 10^{-5}$ , 8)              | <i>HLA-DRB1*01:01</i><br>(0.009, 8)            |
| 14                | rs566864214              | 31480770                   | <i>MICB</i> (1.9 kb downstream)       | HLA-B aa-158<br>(0.0737, 23)                    | HLA-B aa-158<br>(0.1029, 23)                    | HLA-B aa-158<br>(0.0207, 60)                    | HLA-B aa-158<br>( $e=0.0334$ , 60)              | rs16822820<br>( <i>HLA-DRB1</i> )<br>( $9.8 \times 10^{-5}$ , 16) | <i>HLA-B*51:01</i><br>(0.000, 24)              |
| 15                | rs9266716                | 31349727                   | <i>AL671883.3</i> (5.9 kb downstream) | HLA-B aa-163<br>(0.4128, 168)                   | <i>HLA-B*07</i><br>(0.3491, 170)                | HLA-B aa-116<br>(0.4515, 211)                   | HLA-B*44:03<br>(0.3672, 232)                    | HLA-B Thr163<br>( $9.5 \times 10^{-6}$ , 68)                      | HLA-B Thr163<br>(0.002, 68)                    |
| 16                | rs147145279 <sup>f</sup> | 31388958                   | <i>HCP5</i> (intron)                  | rs41556715<br>( <i>MICA</i> )<br>(0.9505, 4)    | rs41556715<br>( <i>MICA</i> )<br>(0.9474, 4)    | rs41556715<br>( <i>MICA</i> )<br>(0.7999, 5)    | rs41556715<br>( <i>MICA</i> )<br>(0.8368, 5)    | rs41556715<br>( <i>MICA</i> )<br>( $1.8 \times 10^{-5}$ , 5)      | rs41556715<br>( <i>MICA</i> )<br>(0.043, 5)    |
| 17                | rs12660712               | 29734634                   | <i>AL645939.5</i> (3.6 kb downstream) | rs41551813<br>( <i>HLA-G</i> )<br>(0.7624, 136) | rs41551813<br>( <i>HLA-G</i> )<br>(0.7547, 136) | rs61730331<br>( <i>OR211P</i> )<br>(0.4951, 49) | rs61730331<br>( <i>OR211P</i> )<br>(0.4887, 49) | <i>HLA-B*51:01</i><br>( $1.4 \times 10^{-4}$ , 24)                | rs41551813<br>( <i>HLA-G</i> )<br>(0.000, 275) |
| 18                | rs3104406                | 32682443                   | <i>AL662789.1</i> (3.3 kb upstream)   | HLA-DQA1 aa-25<br>(0.3647, 145)                 | HLA-DQA1 aa-25<br>(0.3334, 144)                 | HLA-DRB1 aa-67<br>(0.5896, 138)                 | HLA-DRB1 Leu67<br>(0.4870, 139)                 | HLA-DQA1 aa-25<br>( $1.4 \times 10^{-4}$ , 4)                     | HLA-DQA1 aa-25<br>(0.013, 2)                   |

Abbreviations: aa, amino acid; chr6, chromosome 6; EUR, people of European ancestry; LD, linkage disequilibrium; NA, not applicable, PP, posterior probability; SAS, people of South Asian ancestry.

<sup>a</sup>Round of stepwise regression analysis.

<sup>b</sup>Build 151 dbSNP rsID when applicable

<sup>c</sup>Base pair position in hg19 human reference; for classical HLA proteins the position of the center of the coding unit is given; for indels (all of which are insertions into the reference sequence), the position immediately before the insertion point is given.

<sup>d</sup> $W_n^2$  and  $\epsilon'$  coefficients of linkage disequilibrium can accommodate multiallelic variants; see Subjects and Methods for more details.

<sup>e</sup>P-values and Bayesian posterior probabilities based on the final full regression model for associated variants.

<sup>f</sup>rs147145279 is shorthand for two biallelic indels (rs559509014 and rs147145279) that were genotyped as a single triallelic indel by phase 3 1000 Genomes Project with –, A and AA alleles, and the stepwise-selected variant is one of the biallelic splits of this triallelic indel.

**Table S29. Parameters of 95% Bayesian credible sets for the 17 MHC psoriasis association signals in the final full regression model for people of South Asian or European ancestry.**

| Step <sup>a</sup> | Stepwise-selected variant |                            |       | Top variant in 95% BCS   |                            |       | Size of 95% BCS |                         |                          |                     |
|-------------------|---------------------------|----------------------------|-------|--------------------------|----------------------------|-------|-----------------|-------------------------|--------------------------|---------------------|
|                   | ID <sup>b</sup>           | chr6 position <sup>c</sup> | PP    | ID <sup>b</sup>          | chr6 position <sup>c</sup> | PP    | No. variants    | Left bound <sup>d</sup> | Right bound <sup>d</sup> | Length <sup>d</sup> |
| 2                 | HLA-B aa-67               | 31324536                   | 1.000 | HLA-B aa-67              | 31324536                   | 1.000 | 1               | 31324535                | 31324537                 | 3                   |
| 3                 | rs1655901                 | 29916804                   | 1.000 | rs1655901                | 29916804                   | 1.000 | 1               | 29916804                | 29916804                 | 1                   |
| 4                 | rs2734588                 | 31496467                   | 0.014 | rs3093547                | 31541848                   | 0.081 | 459             | 31002742                | 31973511                 | 970,770             |
| 5                 | rs2853998                 | 31327164                   | 0.942 | rs2853998                | 31327164                   | 0.942 | 2               | 31324709                | 31327164                 | 2456                |
| 6                 | rs114811870               | 31324938                   | 0.349 | rs114811870              | 31324938                   | 0.349 | 6               | 31323480                | 31326410                 | 2931                |
| 7                 | rs28573770                | 32679275                   | 0.133 | rs28573770               | 32679275                   | 0.133 | 17              | 32340792                | 32679275                 | 338,484             |
| 8                 | <i>HLA-C*06:02</i>        | 31238192                   | 0.664 | <i>HLA-C*06:02</i>       | 31238192                   | 0.664 | 2               | 31236946                | 31251924                 | 14,979              |
| 9                 | rs2844626                 | 31229552                   | 0.541 | rs2844626                | 31229552                   | 0.541 | 13              | 31229552                | 31324935                 | 95,384              |
| 10                | rs1736927                 | 29796115                   | 0.012 | rs3215482                | 29796126                   | 0.023 | 92              | 29784514                | 29913232                 | 128,719             |
| 11                | rs9271539                 | 32590028                   | 0.562 | rs9271539                | 32590028                   | 0.562 | 2               | 32589791                | 32590028                 | 238                 |
| 12                | rs9378158                 | 31305761                   | 0.040 | rs9501557                | 31231306                   | 0.137 | 5376            | 30805799                | 31804729                 | 998,931             |
| 13                | rs112540072               | 32338289                   | 0.275 | rs112540072              | 32338289                   | 0.275 | 3057            | 31840408                | 32836111                 | 995,704             |
| 14                | rs566864214               | 31480770                   | 0.253 | rs566864214              | 31480770                   | 0.253 | 10              | 31007124                | 31773521                 | 766,398             |
| 15                | rs9266716                 | 31349727                   | 0.119 | rs9266716                | 31349727                   | 0.119 | 106             | 31140068                | 31541848                 | 401,781             |
| 16                | rs147145279 <sup>e</sup>  | 31388958                   | 0.184 | rs147145279 <sup>e</sup> | 31388959                   | 0.184 | 8935            | 30889260                | 31888869                 | 999,610             |
| 17                | rs12660712                | 29734634                   | 0.032 | rs12660712               | 29734634                   | 0.032 | 6416            | 29234827                | 30233996                 | 999,170             |
| 18                | rs3104406                 | 32682443                   | 0.061 | rs3104406                | 32682443                   | 0.061 | 8965            | 32183589                | 33181884                 | 998,296             |

Abbreviations: aa, amino acid; BCS, Bayesian credible set; chr6, chromosome 6; PP, posterior probability.

<sup>a</sup>Round of stepwise regression analysis.

<sup>b</sup>ID is build 151 dbSNP rsID when applicable.

<sup>c</sup>Base pair position in hg19 human reference; for amino acids and classical HLA proteins the position of the center of the coding unit is given; for indels (all of which are insertions into the reference sequence), the position immediately before the insertion point is given.

<sup>d</sup>All values are bp on chromosome 6 of the hg19 human reference assembly.

<sup>e</sup>rs147145279 is shorthand for two biallelic indels (rs559509014 and rs147145279) that were genotyped as a single triallelic indel by phase 3 1000 Genomes Project with -, A and AA alleles, and the stepwise-selected variant is one of the biallelic splits of this triallelic indel.

**Table S30. Enrichment of variant types in full MHC regression models compared to the set of analyzed MHC variants.**

| Population             | Variant type             | Number of variants |                            |                           | Fold-enrichment            |                           | Enrichment p-value         |                           |
|------------------------|--------------------------|--------------------|----------------------------|---------------------------|----------------------------|---------------------------|----------------------------|---------------------------|
|                        |                          | Regression model   | Classical MHC <sup>a</sup> | Extended MHC <sup>a</sup> | Classical MHC <sup>a</sup> | Extended MHC <sup>a</sup> | Classical MHC <sup>a</sup> | Extended MHC <sup>a</sup> |
| South Asian            | all                      | 5                  | 56,390                     | 101,640                   | NA                         | NA                        | NA                         | NA                        |
|                        | HLA protein-changing     | 1                  | 1659                       | 1659                      | 6.80                       | 12.25                     | 0.14                       | 0.079                     |
|                        | non-HLA protein-changing | 0                  | 716                        | 1247                      | 0.00                       | 0.00                      | 1.00                       | 1.00                      |
|                        | indel                    | 1                  | 4828                       | 9672                      | 2.34                       | 2.10                      | 0.36                       | 0.39                      |
|                        | structural (≥ 50 bp)     | 0                  | 39                         | 66                        | 0.00                       | 0.00                      | 1.00                       | 1.00                      |
|                        | full multiallelic        | 1                  | 732                        | 929                       | 15.41                      | 21.88                     | 0.063                      | 0.045                     |
|                        | split multiallelic       | 2                  | 3550                       | 5133                      | 6.35                       | 7.92                      | 0.035                      | 0.023                     |
|                        | multiallelic (all)       | 3                  | 4282                       | 6062                      | 7.90                       | 10.06                     | 0.0039                     | 0.0019                    |
| European               | all                      | 14                 | 49,407                     | 83,352                    | NA                         | NA                        | NA                         | NA                        |
|                        | HLA protein-changing     | 5                  | 1497                       | 1497                      | 11.79                      | 19.89                     | $4.0 \times 10^{-5}$       | $3.2 \times 10^{-6}$      |
|                        | non-HLA protein-changing | 0                  | 628                        | 973                       | 0.00                       | 0.00                      | 1.00                       | 1.00                      |
|                        | indel                    | 3                  | 4280                       | 7035                      | 2.47                       | 2.54                      | 0.12                       | 0.11                      |
|                        | structural (≥ 50 bp)     | 0                  | 31                         | 43                        | 0.00                       | 0.00                      | 1.00                       | 1.00                      |
|                        | full multiallelic        | 2                  | 583                        | 680                       | 12.11                      | 17.51                     | 0.012                      | 0.0057                    |
|                        | split multiallelic       | 4                  | 2994                       | 3910                      | 4.71                       | 6.09                      | 0.0082                     | 0.0033                    |
|                        | multiallelic (all)       | 6                  | 3577                       | 4590                      | 5.92                       | 7.78                      | $2.6 \times 10^{-4}$       | $5.7 \times 10^{-5}$      |
| South Asian + European | all                      | 17                 | 45,159                     | 71,832                    | NA                         | NA                        | NA                         | NA                        |
|                        | HLA protein-changing     | 2                  | 1483                       | 1483                      | 3.58                       | 5.70                      | 0.11                       | 0.047                     |
|                        | non-HLA protein-changing | 0                  | 522                        | 806                       | 0.00                       | 0.00                      | 1.00                       | 1.00                      |
|                        | indel                    | 1                  | 4029                       | 6410                      | 0.66                       | 0.66                      | 0.80                       | 0.80                      |
|                        | structural (≥ 50 bp)     | 0                  | 29                         | 39                        | 0.00                       | 0.00                      | 1.00                       | 1.00                      |
|                        | full multiallelic        | 1                  | 539                        | 613                       | 4.93                       | 6.89                      | 0.18                       | 0.14                      |
|                        | split multiallelic       | 3                  | 2809                       | 3602                      | 2.84                       | 3.52                      | 0.085                      | 0.051                     |
|                        | multiallelic (all)       | 4                  | 3348                       | 4215                      | 3.17                       | 4.01                      | 0.033                      | 0.015                     |

Abbreviations: NA, not applicable.

<sup>a</sup>MHC regions: classical (chr6:29.64-33.12 Mb), extended (chr6:24-36 Mb); coordinates based on hg19 reference assembly.

**Table S31. Enrichment of variant types in the MHC region compared to the whole genome.**

| Population <sup>a</sup> | Variant type <sup>b</sup>  | Number of variants         |                           |              | Fold-enrichment            |                           | Enrichment p-value         |                           |
|-------------------------|----------------------------|----------------------------|---------------------------|--------------|----------------------------|---------------------------|----------------------------|---------------------------|
|                         |                            | Classical MHC <sup>c</sup> | Extended MHC <sup>d</sup> | Whole genome | Classical MHC <sup>c</sup> | Extended MHC <sup>d</sup> | Classical MHC <sup>c</sup> | Extended MHC <sup>d</sup> |
| All                     | all                        | 58,996                     | 102,123                   | 13,661,501   | NA                         | NA                        | NA                         | NA                        |
|                         | protein-changing           | 938                        | 1,241                     | 40,966       | 5.30                       | 4.05                      | $1.5 \times 10^{-820}$     | $7.0 \times 10^{-822}$    |
|                         | indel                      | 4,231                      | 9,436                     | 1,478,852    | 0.66                       | 0.85                      | 1.00                       | 1.00                      |
|                         | structural ( $\geq 50$ bp) | 65                         | 100                       | 9,753        | 1.54                       | 1.37                      | $6.2 \times 10^{-4}$       | 0.0014                    |
|                         | multiallelic               | 1,065                      | 1,841                     | 236,146      | 1.04                       | 1.04                      | 0.079                      | 0.036                     |
| South Asian             | all                        | 54,257                     | 88,781                    | 10,215,054   | NA                         | NA                        | NA                         | NA                        |
|                         | protein-changing           | 857                        | 1,126                     | 31,922       | 5.05                       | 4.06                      | $8.0 \times 10^{-718}$     | $3.2 \times 10^{-749}$    |
|                         | indel                      | 3,899                      | 8,241                     | 1,171,219    | 0.63                       | 0.81                      | 1.00                       | 1.00                      |
|                         | structural ( $\geq 50$ bp) | 61                         | 90                        | 7,331        | 1.57                       | 1.41                      | $6.2 \times 10^{-4}$       | 0.0010                    |
|                         | multiallelic               | 1,021                      | 1,689                     | 182,099      | 1.06                       | 1.07                      | 0.042                      | 0.0038                    |
| European                | all                        | 53,326                     | 87,148                    | 9,763,639    | NA                         | NA                        | NA                         | NA                        |
|                         | protein-changing           | 824                        | 1,089                     | 30,831       | 4.89                       | 3.96                      | $1.0 \times 10^{-668}$     | $8.5 \times 10^{-704}$    |
|                         | indel                      | 3,814                      | 8,088                     | 1,129,099    | 0.62                       | 0.80                      | 1.00                       | 1.00                      |
|                         | structural ( $\geq 50$ bp) | 58                         | 83                        | 7,036        | 1.51                       | 1.32                      | 0.0019                     | 0.0081                    |
|                         | multiallelic               | 1,004                      | 1,665                     | 174,417      | 1.05                       | 1.07                      | 0.049                      | 0.0031                    |

Abbreviations: NA, not applicable.

<sup>a</sup>Populations as defined by phase 3 1000 Genomes: All includes 2504 individuals from 26 different populations; South Asian includes 489 individuals from five South Asian populations, and European includes 503 individuals from five European populations.

<sup>b</sup>Variant types based on autosomal variants in release 5 of phase 3 of the 1000 Genomes Project with minor allele frequency  $\geq 0.01$  in the designated population.

<sup>c</sup>Classical MHC: chr6:29.64–33.12 Mbp in hg19 reference assembly.

<sup>d</sup>Extended MHC: chr6:24–36 Mbp in hg19 reference assembly.



**Table S32. Complete results for stepwise conditional analysis of South Asian, European and transethnic psoriasis associations in the extended MHC region.**

See Excel file mmc2.xlsx in Supplemental information. The COL\_KEY and Variant\_KEY worksheets of this file describe the column headers, and how to interpret the nature of the various types of variants analyzed for association.

**Table S33. Comparison of total and decomposed goodness of fit of within-population vs. cross-population association models for the MHC region.**

| model 1<br>(within-pop.) <sup>a</sup> | model 2<br>(cross-pop.) <sup>b</sup> | Model<br>Subset | df      |         | AIC       |           |                | Evidence<br>Ratio <sup>d</sup> | Tjur's R <sup>2(e)</sup> |         |        |
|---------------------------------------|--------------------------------------|-----------------|---------|---------|-----------|-----------|----------------|--------------------------------|--------------------------|---------|--------|
|                                       |                                      |                 | model 1 | model 2 | model 1   | model 2   | Δ <sup>c</sup> |                                | model 1                  | model 2 | Δ      |
| SAS in SAS                            | EUR-top5 in SAS                      | full            | 21      | 23      | -1228.35  | -1169.07  | -59.28         | $7.4 \times 10^{12}$           | 0.268                    | 0.257   | 0.011  |
|                                       |                                      | covariates      | 15      | 15      | -345.73   | -347.29   | 1.56           | $4.6 \times 10^{-1}$           | 0.079                    | 0.080   | -0.001 |
|                                       |                                      | <i>HLA-C*06</i> | 1       | 1       | -582.18   | -594.15   | 11.97          | $2.5 \times 10^{-3}$           | 0.123                    | 0.127   | -0.004 |
|                                       |                                      | other variants  | 5       | 7       | -300.44   | -227.64   | -72.80         | $6.4 \times 10^{15}$           | 0.066                    | 0.051   | 0.015  |
| SAS in SAS                            | EUR-full in SAS                      | full            | 21      | 33      | -1228.35  | -1171.72  | -56.63         | $2.0 \times 10^{12}$           | 0.268                    | 0.262   | 0.006  |
|                                       |                                      | covariates      | 15      | 15      | -345.73   | -335.64   | -10.09         | $1.6 \times 10^2$              | 0.079                    | 0.077   | 0.002  |
|                                       |                                      | <i>HLA-C*06</i> | 1       | 1       | -582.18   | -521.35   | -60.84         | $1.6 \times 10^{13}$           | 0.123                    | 0.111   | 0.012  |
|                                       |                                      | other variants  | 5       | 17      | -300.44   | -314.74   | 14.30          | $7.9 \times 10^{-4}$           | 0.066                    | 0.074   | -0.008 |
| EUR-top5 in EUR                       | SAS in EUR                           | full            | 82      | 80      | -14805.54 | -14378.27 | -427.27        | $6.0 \times 10^{92}$           | 0.304                    | 0.296   | 0.009  |
|                                       |                                      | covariates      | 74      | 74      | -9991.09  | -10049.17 | 58.09          | $2.4 \times 10^{-13}$          | 0.198                    | 0.200   | -0.002 |
|                                       |                                      | <i>HLA-C*06</i> | 1       | 1       | -2878.65  | -3259.53  | 380.88         | $2.0 \times 10^{-83}$          | 0.064                    | 0.072   | -0.008 |
|                                       |                                      | other variants  | 7       | 5       | -1935.80  | -1069.57  | -866.24        | $1.3 \times 10^{188}$          | 0.042                    | 0.023   | 0.019  |
| EUR-full in EUR                       | SAS in EUR                           | full            | 92      | 80      | -15086.99 | -14378.27 | -708.72        | $7.9 \times 10^{153}$          | 0.310                    | 0.296   | 0.014  |
|                                       |                                      | covariates      | 74      | 74      | -9853.78  | -10049.17 | 195.40         | $3.7 \times 10^{-43}$          | 0.195                    | 0.200   | -0.005 |
|                                       |                                      | <i>HLA-C*06</i> | 1       | 1       | -2292.53  | -3259.53  | 967.00         | $1.0 \times 10^{-210}$         | 0.051                    | 0.072   | -0.021 |
|                                       |                                      | other variants  | 17      | 5       | -2940.68  | -1069.57  | -1871.12       | $2.0 \times 10^{406}$          | 0.064                    | 0.023   | 0.041  |

Abbreviations: AIC, Akaike Information Criterion; df, degrees of freedom; EUR, European; SAS, South Asian.

<sup>a</sup>Within-population models are built by stepwise analysis within a single population, and the model parameters (coefficients and standard errors) are estimated for that same population (e.g., "EUR-full in EUR" refers to the full regression model that was selected and estimated in the same European dataset).

<sup>b</sup>Cross-population models are built by stepwise analysis in one population, but the model parameters are estimated in another population (e.g., "EUR-top5 in SAS" refers to the five most significant variants of the full regression model that was selected in the European dataset but with parameters re-estimated in the South Asian dataset).

<sup>c</sup>The difference in AIC of models 1 and 2. Negative values indicate that model 1 has more support; positive values that model 2 has more support.

Absolute differences of 10 or more indicate that the poorer model has essentially no support of being the best approximating model of the two being compared.

<sup>d</sup>Evidence ratio = relative likelihood of model 1 versus model 2 =  $1/\exp((AIC_1 - AIC_2)/2)$ .

<sup>e</sup>Also known as Tjur's D (coefficient of discrimination), equal to the difference in the average model-predicted probability of having psoriasis between psoriasis cases and unaffected controls.

**Table S34. Mean imputation quality of variants in the imputed genotype datasets for the classical MHC region, cross-classified by minor allele frequency, ancestry, and reference panel.**

| MAF <sup>b</sup> | Ancestry | Mean imputation quality (R <sup>2</sup> ) for variants imputed using reference panel <sup>a</sup> |                                   |                                   |                                  |        |
|------------------|----------|---------------------------------------------------------------------------------------------------|-----------------------------------|-----------------------------------|----------------------------------|--------|
|                  |          | 1KGP+HRC                                                                                          | SNP2HLA<br>(5 genes) <sup>c</sup> | SNP2HLA<br>(2 genes) <sup>c</sup> | SNP2HLA<br>(1 gene) <sup>c</sup> | All    |
| ≥ 0.05           | SAS      | 0.8265                                                                                            | 0.9762                            | 0.9724                            | 0.9917                           | 0.8298 |
|                  | EUR      | 0.8051                                                                                            | 0.9887                            | 0.9877                            | 0.9625                           | 0.8098 |
|                  | SAS+EUR  | 0.8066                                                                                            | 0.9871                            | 0.9750                            | 0.9632                           | 0.8105 |
| 0.01–0.05        | SAS      | 0.8544                                                                                            | 0.8848                            | 0.8518                            | 0.7274                           | 0.8545 |
|                  | EUR      | 0.8280                                                                                            | 0.9490                            | 0.9199                            | 0.8914                           | 0.8304 |
|                  | SAS+EUR  | 0.8402                                                                                            | 0.9285                            | 0.8756                            | 0.8772                           | 0.8418 |
| < 0.01           | SAS      | 0.2974                                                                                            | 0.2161                            | 0.1922                            | 0.2917                           | 0.2959 |
|                  | EUR      | 0.4176                                                                                            | 0.3627                            | 0.4414                            | 0.1516                           | 0.4170 |
|                  | SAS+EUR  | 0.3968                                                                                            | 0.3471                            | 0.3756                            | 0.1602                           | 0.3962 |
| Total            | SAS      | 0.5841                                                                                            | 0.6448                            | 0.5361                            | 0.7599                           | 0.5852 |
|                  | EUR      | 0.6212                                                                                            | 0.7975                            | 0.8399                            | 0.7554                           | 0.6246 |
|                  | SAS+EUR  | 0.6183                                                                                            | 0.8124                            | 0.7229                            | 0.7536                           | 0.6212 |

Only biallelic variants are considered, including splits of multiallelic variants.

Abbreviations: 1KGP, 1000 Genomes Project; EUR, European; HRC, Haplotype Reference Consortium; MAF, minor allele frequency; NA, not applicable; SAS, South Asian.

<sup>a</sup>Average imputation quality computed as a weighted mean of empirical values, weighted by the effective sample size of each study in the ancestry dataset.

<sup>b</sup>Membership in MAF bins is based on a weighted mean of MAF values for each study in the ancestry group, with the effective study sample size as weights.

<sup>c</sup>Three SNP2HLA reference panels were used for imputing HLA gene variants in the South Asian and European datasets; 5 gene, 2 gene and 1 gene refer, respectively, to the panels used to impute HLA-A/B/C/DQB1/DRB1, HLA-DPA1/DPB1, or HLA-DQA1 variants.

**Table S35. Comparison of 95% Bayesian credible sets for four MHC association signals occurring in both the transethnic association model and in at least one of the two monoethnic association models.**

| Stepwise-<br>selected variant | 95% Bayesian credible set |                          |                          |                   |       |         |              |      |         |                      |       |         |
|-------------------------------|---------------------------|--------------------------|--------------------------|-------------------|-------|---------|--------------|------|---------|----------------------|-------|---------|
|                               | Top variant               |                          |                          | PP of top variant |       |         | No. variants |      |         | Interval length (kb) |       |         |
|                               | SAS                       | EUR                      | SAS+EUR                  | SAS               | EUR   | SAS+EUR | SAS          | EUR  | SAS+EUR | SAS                  | EUR   | SAS+EUR |
| <i>HLA-C*06:02</i>            | rs12199223                | rs12189871               | <i>HLA-C*06:02</i>       | 0.266             | 0.712 | 0.664   | 11           | 2    | 2       | 108.7                | 15.0  | 15.0    |
| HLA-B aa-67                   | NA                        | HLA-B aa-67              | HLA-B aa-67              | NA                | 1.000 | 1.000   | NA           | 1    | 1       | NA                   | 0.003 | 0.003   |
| rs1655901                     | NA                        | rs1655901                | rs1655901                | NA                | 1.000 | 1.000   | NA           | 1    | 1       | NA                   | 0.001 | 0.001   |
| rs147145279 <sup>a</sup>      | NA                        | rs147145279 <sup>a</sup> | rs147145279 <sup>a</sup> | NA                | 0.229 | 0.184   | NA           | 3910 | 8935    | NA                   | 997.6 | 999.6   |

To ensure an unbiased comparison, credible sets were recomputed for all three ancestry association models after restricting the variant sets to markers passing the imputation quality threshold of  $r^2 \geq 0.70$  for all eight European and both South Asian studies.

Abbreviations: aa, amino acid; EUR, European; NA, not applicable; PP, posterior probability; SAS, South Asian.

<sup>a</sup>Variant rs147145279 is shorthand for two biallelic indels (rs559509014 and rs147145279) that were genotyped as a single triallelic indel by phase 3 1000 Genomes Project with -, A and AA alleles, and the stepwise-selected variant is one of the biallelic splits of this triallelic indel.

**Table S36. Comparison of total and decomposed goodness of fit of transethnic vs. monoethnic association models for the MHC region.**

| model 1<br>(transethnic) <sup>a</sup> | model 2<br>(monoethnic) <sup>b</sup> | Model<br>Subset | df      |         | AIC       |           |                | Evidence<br>Ratio <sup>d</sup> | Tjur's R <sup>2(e)</sup> |         |        |
|---------------------------------------|--------------------------------------|-----------------|---------|---------|-----------|-----------|----------------|--------------------------------|--------------------------|---------|--------|
|                                       |                                      |                 | model 1 | model 2 | model 1   | model 2   | Δ <sup>c</sup> |                                | model 1                  | model 2 | Δ      |
| SAS+EUR in SAS                        | SAS in SAS                           | full            | 35      | 21      | -1213.32  | -1228.35  | 15.04          | $5.4 \times 10^{-4}$           | 0.271                    | 0.268   | 0.003  |
|                                       |                                      | covariates      | 20      | 15      | -416.52   | -345.73   | -70.79         | $2.4 \times 10^{15}$           | 0.094                    | 0.079   | 0.014  |
|                                       |                                      | <i>HLA-C*06</i> | 1       | 1       | -442.02   | -582.18   | 140.17         | $3.7 \times 10^{-31}$          | 0.095                    | 0.123   | -0.028 |
|                                       |                                      | other variants  | 19      | 5       | -354.78   | -300.44   | -54.34         | $6.3 \times 10^{11}$           | 0.083                    | 0.066   | 0.017  |
| SAS+EUR in SAS                        | EUR in SAS                           | full            | 35      | 33      | -1213.32  | -1171.72  | -41.59         | $1.1 \times 10^9$              | 0.271                    | 0.262   | 0.009  |
|                                       |                                      | covariates      | 20      | 15      | -416.52   | -335.64   | -80.88         | $3.7 \times 10^{17}$           | 0.094                    | 0.077   | 0.017  |
|                                       |                                      | <i>HLA-C*06</i> | 1       | 1       | -442.02   | -521.35   | 79.33          | $5.9 \times 10^{-18}$          | 0.095                    | 0.111   | -0.017 |
|                                       |                                      | other variants  | 19      | 17      | -354.78   | -314.74   | -40.04         | $5.0 \times 10^8$              | 0.083                    | 0.074   | 0.009  |
| SAS+EUR in EUR                        | SAS in EUR                           | full            | 94      | 80      | -15117.71 | -14378.27 | -739.44        | $3.7 \times 10^{160}$          | 0.311                    | 0.296   | 0.015  |
|                                       |                                      | covariates      | 74      | 74      | -9860.92  | -10049.17 | 188.25         | $1.3 \times 10^{-41}$          | 0.195                    | 0.200   | -0.005 |
|                                       |                                      | <i>HLA-C*06</i> | 1       | 1       | -2355.60  | -3259.53  | 903.93         | $5.2 \times 10^{-197}$         | 0.053                    | 0.072   | -0.019 |
|                                       |                                      | other variants  | 19      | 5       | -2901.19  | -1069.57  | -1831.62       | $2.7 \times 10^{451}$          | 0.063                    | 0.023   | 0.040  |
| SAS+EUR in EUR                        | EUR in EUR                           | full            | 94      | 92      | -15117.71 | -15086.99 | -30.72         | $4.7 \times 10^6$              | 0.311                    | 0.310   | 0.001  |
|                                       |                                      | covariates      | 74      | 74      | -9860.92  | -9853.78  | -7.15          | $3.6 \times 10^1$              | 0.195                    | 0.195   | 0.000  |
|                                       |                                      | <i>HLA-C*06</i> | 1       | 1       | -2355.60  | -2292.53  | -63.07         | $5.0 \times 10^{13}$           | 0.053                    | 0.051   | 0.002  |
|                                       |                                      | other variants  | 19      | 17      | -2901.19  | -2940.68  | 39.50          | $2.7 \times 10^{-9}$           | 0.063                    | 0.064   | -0.001 |
| SAS+EUR in<br>SAS+EUR                 | SAS in<br>SAS+EUR                    | full            | 110     | 96      | -17237.47 | -16461.37 | -776.10        | $3.4 \times 10^{168}$          | 0.320                    | 0.306   | 0.014  |
|                                       |                                      | covariates      | 90      | 90      | -10944.17 | -11163.09 | 218.91         | $2.9 \times 10^{-48}$          | 0.195                    | 0.201   | -0.006 |
|                                       |                                      | <i>HLA-C*06</i> | 1       | 1       | -2931.78  | -4015.65  | 1083.87        | $4.4 \times 10^{-236}$         | 0.059                    | 0.080   | -0.021 |
|                                       |                                      | other variants  | 19      | 5       | -3361.52  | -1282.63  | -2078.89       | $5.4 \times 10^{397}$          | 0.066                    | 0.025   | 0.041  |
| SAS+EUR in<br>SAS+EUR                 | EUR in<br>SAS+EUR                    | full            | 110     | 108     | -17237.47 | -17123.59 | -113.88        | $5.4 \times 10^{24}$           | 0.320                    | 0.318   | 0.002  |
|                                       |                                      | covariates      | 90      | 90      | -10944.17 | -10884.18 | -59.99         | $1.1 \times 10^{13}$           | 0.195                    | 0.194   | 0.001  |
|                                       |                                      | <i>HLA-C*06</i> | 1       | 1       | -2931.78  | -2915.15  | -16.63         | $4.1 \times 10^3$              | 0.059                    | 0.058   | 0.000  |
|                                       |                                      | other variants  | 19      | 17      | -3361.52  | -3324.26  | -37.26         | $1.2 \times 10^8$              | 0.066                    | 0.065   | 0.001  |

Abbreviations: AIC, Akaike Information Criterion; df, degrees of freedom; EUR, European; SAS, South Asian.

<sup>a</sup>Transethnic models are built by stepwise analysis in a dataset combining two ethnic groups, and the parameters (coefficients and standard errors) are estimated in either of the individual ethnic groups or their combination (e.g., "SAS+EUR in EUR" refers to the regression model that was selected in the transethnic South Asian + European dataset but with parameters re-estimated in the European dataset)

<sup>b</sup>Monoethnic models are built by stepwise analysis in a dataset for a single ethnic group, and the parameters are estimated in either of the individual ethnic groups or their combination (e.g., "SAS in SAS+EUR" refers to the regression model that was selected in the South Asian dataset but with parameters re-estimated in the combined South Asian + European dataset)

<sup>c</sup>The difference in AIC of models 1 and 2. Negative values indicate that model 1 has more support; positive values that model 2 has more support. Absolute differences of 10 or more indicate that the poorer model has essentially no support of being the best approximating model of the two being compared.

<sup>d</sup>Evidence ratio = relative likelihood of model 1 versus model 2 =  $1/\exp((AIC_1 - AIC_2)/2)$ .

<sup>e</sup>Also known as Tjur's D (coefficient of discrimination), equal to the difference in the average model-predicted probability of having psoriasis between psoriasis cases and unaffected controls.

**Table S37. Most significant cis-eQTL effects in relevant tissues for noncoding psoriasis-associated MHC variants with a Bayesian posterior probability > 0.50.**

| Tissue <sup>a</sup>          | Study <sup>b</sup> | N   | most significant cis-eQTL result (target gene, sign risk allele effect, p-value) for variant |                              |                            |                         |                              |                              |                            |                             |                            |
|------------------------------|--------------------|-----|----------------------------------------------------------------------------------------------|------------------------------|----------------------------|-------------------------|------------------------------|------------------------------|----------------------------|-----------------------------|----------------------------|
|                              |                    |     | rs1655901                                                                                    | rs2844626                    | rs72866766                 | rs137854633             | rs2853998                    | rs2442752                    | rs6935999                  | rs4947340                   | rs9271529                  |
| Skin (normal, PsV lesional)  | PsV RNAseq         | 171 | —                                                                                            | <i>PSORS1C1</i> (+, 1e-04)   | <i>MICA</i> (-, 1e-03)     | —                       | —                            | <i>C4A</i> (+, 3e-06)        | —                          | <i>HLA-DRB1</i> (-, 1e-13)  | <i>C4A</i> (+, 2e-05)      |
| Skin (not sun-exposed)       | GTEEx              | 517 | <i>ZFP57</i> (+, 1e-09)                                                                      | <i>C4A</i> (-, 7e-15)        | <i>MICA</i> (-, 5e-10)     | —                       | <i>MIR6891</i> (+, 4e-08)    | <i>PSORS1C3</i> (+, 2e-11)   | NS                         | —                           | <i>HLA-DRB5</i> (+, 2e-41) |
| Skin (sun exposed)           | GTEEx              | 605 | <i>HCP5B</i> (+, 4e-15)                                                                      | <i>HLA-C</i> (+, 7e-15)      | <i>CCHCR1</i> (-, 7e-14)   | —                       | <i>MIR6891</i> (+, 3e-09)    | <i>C4A</i> (+, 5e-08)        | <i>HLA-DRB5</i> (-, 1e-04) | —                           | <i>HLA-DRB5</i> (+, 3e-45) |
| Skin                         | TwinsUK            | 370 | <i>ZFP57</i> (+, 1e-10)                                                                      | <i>CCHCR1</i> (+, 2e-10)     | <i>PSORS1C3</i> (+, 2e-07) | —                       | <i>HLA-B</i> (-, 2e-23)      | <i>PSORS1C3</i> (+, 1e-13)   | —                          | <i>HLA-DQA2</i> (+, 1e-44)  | —                          |
| Fibroblasts (cultured)       | GTEEx              | 483 | <i>HCG4P7</i> (+, 9e-26)                                                                     | <i>AL645933.2</i> (-, 9e-11) | <i>MICA</i> (-, 8e-15)     | —                       | <i>AL645933.2</i> (-, 5e-06) | <i>C4A</i> (+, 1e-05)        | <i>LY6G5C</i> (-, 4e-04)   | —                           | <i>C4B</i> (-, 2e-08)      |
| Fibroblasts                  | GENCORD            | 186 | <i>GABBR1</i> (+, 1e-02)                                                                     | <i>AL645933.2</i> (-, 2e-06) | <i>MICA</i> (-, 7e-11)     | <i>HLA-B</i> (-, 6e-14) | <i>AL645933.2</i> (-, 5e-08) | <i>AL645933.2</i> (+, 6e-03) | <i>CSNK2B</i> (-, 3e-03)   | <i>ZBTB22</i> (+, 3e-03)    | <i>HLA-DRB5</i> (+, 3e-03) |
| Whole blood, PBMCs           | eQTLGen Consortium | 32K | —                                                                                            | <i>C4B</i> (+, 8e-93)        | <i>MICA</i> (-, 4e-103)    | —                       | —                            | <i>HLA-B</i> (+, 8e-192)     | <i>HLA-DRB6</i> (-, 1e-10) | <i>HLA-DQA2</i> (+, 3e-310) | <i>HLA-DRB6</i> (-, 3e-10) |
| Whole blood                  | GTEEx              | 670 | <i>HCP5B</i> (+, 2e-24)                                                                      | <i>HLA-C</i> (+, 1e-39)      | <i>MICA</i> (-, 3e-13)     | —                       | <i>MIR6891</i> (+, 6e-15)    | <i>NOTCH4</i> (-, 2e-14)     | NS                         | —                           | <i>HLA-DRB5</i> (+, 1e-39) |
| Whole blood                  | Lepik (2018)       | 471 | <i>AL645939.5</i> (+, 4e-12)                                                                 | <i>HLA-C</i> (+, 3e-08)      | <i>MICA</i> (-, 1e-17)     | —                       | <i>HLA-B</i> (-, 1e-11)      | <i>IER3</i> (-, 3e-08)       | —                          | —                           | <i>HLA-DRB5</i> (+, 3e-39) |
| Whole blood                  | TwinsUK            | 195 | <i>HCP5B</i> (+, 9e-10)                                                                      | <i>CCHCR1</i> (+, 3e-08)     | <i>PSORS1C3</i> (+, 7e-05) | —                       | <i>HLA-B</i> (-, 7e-08)      | <i>LINC00243</i> (-, 2e-07)  | —                          | <i>HLA-DQA2</i> (+, 9e-36)  | —                          |
| B cells (CD19 <sup>+</sup> ) | CEDAR              | 262 | <i>HLA-A</i> (+, 7e-13)                                                                      | <i>TNXB</i> (+, 2e-03)       | <i>HLA-C</i> (+, 1e-05)    | <i>HLA-C</i> (-, 7e-04) | <i>HLA-C</i> (-, 1e-02)      | <i>HLA-C</i> (+, 3e-07)      | <i>NCR3</i> (-, 9e-07)     | <i>HLA-DRB5</i> (-, 2e-07)  | <i>HLA-DRB1</i> (+, 2e-16) |
| B cells (CD19 <sup>+</sup> ) | Fairfax (2012)     | 282 | <i>HLA-A</i> (+, 7e-13)                                                                      | <i>HCG27</i> (+, 2e-05)      | <i>HLA-C</i> (+, 2e-04)    | <i>HLA-C</i> (-, 2e-09) | <i>ATP6V1G2</i> (+, 1e-05)   | <i>HCG22</i> (+, 2e-05)      | <i>NCR3</i> (-, 2e-06)     | <i>HLA-DRB1</i> (-, 1e-11)  | <i>HLA-DRB1</i> (+, 1e-17) |
| B cells (naïve)              | Schmiedel (2018)   | 91  | <i>DHX16</i> (+, 4e-03)                                                                      | <i>MICB</i> (-, 1e-03)       | <i>POU5F1</i> (-, 4e-03)   | <i>HLA-B</i> (-, 1e-03) | <i>HCG22</i> (-, 5e-03)      | <i>HLA-B</i> (+, 2e-02)      | <i>AGPAT1</i> (-, 3e-03)   | <i>HLA-DRB1</i> (-, 9e-11)  | <i>HLA-DRB5</i> (+, 3e-05) |

**Table S37. (Continued).**

| Tissue <sup>a</sup>                                  | Study <sup>b</sup>  | N   | most significant cis-eQTL result (target gene, sign risk allele effect, p-value) for variant |                                 |                                 |                                 |                                 |                              |                               |                               |                               |
|------------------------------------------------------|---------------------|-----|----------------------------------------------------------------------------------------------|---------------------------------|---------------------------------|---------------------------------|---------------------------------|------------------------------|-------------------------------|-------------------------------|-------------------------------|
|                                                      |                     |     | rs1655901                                                                                    | rs2844626                       | rs72866766                      | rs137854633                     | rs2853998                       | rs2442752                    | rs6935999                     | rs4947340                     | rs9271529                     |
| LCLs                                                 | GTEEx               | 147 | <i>HLA-F-AS1</i><br>(+, 7e-06)                                                               | <i>HLA-C</i><br>(+, 4e-07)      | NS                              | —                               | <i>HCG22</i><br>(-, 7e-08)      | <i>HLA-C</i><br>(-, 2e-08)   | NS                            | —                             | <i>HLA-DRB9</i><br>(-, 1e-14) |
| LCLs                                                 | GENCORD             | 190 | <i>ZFP57</i><br>(+, 4e-06)                                                                   | <i>HCG22</i><br>(-, 7e-06)      | <i>MICA</i><br>(-, 2e-06)       | <i>HLA-B</i><br>(-, 1e-12)      | <i>HLA-B</i><br>(-, 3e-08)      | <i>SKIV2L</i><br>(-, 4e-04)  | <i>NOTCH4</i><br>(+, 3e-03)   | <i>HLA-DRB1</i><br>(-, 1e-17) | <i>HLA-DRB5</i><br>(+, 3e-13) |
| LCLs                                                 | GEUVADIS            | 445 | <i>AL645939.5</i><br>(+, 8e-14)                                                              | <i>AL645933.2</i><br>(-, 1e-12) | <i>MICA</i><br>(-, 4e-10)       | <i>HLA-B</i><br>(-, 2e-16)      | <i>AL645933.2</i><br>(-, 1e-12) | <i>HLA-C</i><br>(-, 6e-09)   | <i>HSPA1A</i><br>(-, 8e-04)   | <i>HLA-DQA1</i><br>(-, 5e-47) | <i>HLA-DRB5</i><br>(+, 8e-19) |
| LCLs                                                 | TwinsUK             | 418 | <i>HLA-F-AS1</i><br>(+, 4e-26)                                                               | <i>RNF5</i><br>(-, 6e-18)       | <i>MICA</i><br>(-, 2e-09)       | —                               | <i>HLA-B</i><br>(-, 5e-25)      | <i>HCG22</i><br>(+, 1e-16)   | —                             | <i>HLA-DQA2</i><br>(+, 1e-71) | —                             |
| NK cells<br>(CD56 <sup>dim</sup> CD16 <sup>+</sup> ) | Schmiedel<br>(2018) | 90  | <i>HLA-F-AS1</i><br>(+, 6e-06)                                                               | <i>CCHCR1</i><br>(+, 9e-05)     | <i>SKIV2L</i><br>(-, 8e-03)     | <i>DDAH2</i><br>(-, 7e-03)      | <i>MDC1-AS1</i><br>(-, 9e-03)   | <i>PPP1R18</i><br>(+, 5e-03) | <i>HSPA1L</i><br>(-, 2e-02)   | <i>HLA-DQA2</i><br>(+, 1e-06) | <i>HLA-DRB5</i><br>(+, 7e-05) |
| Primary T cells<br>(PHA-stim)                        | GENCORD             | 184 | <i>AL645939.5</i><br>(+, 9e-06)                                                              | <i>AL645933.2</i><br>(-, 8e-05) | <i>MICA</i><br>(-, 6e-07)       | <i>HLA-B</i><br>(-, 2e-16)      | <i>HLA-B</i><br>(-, 3e-06)      | <i>ABCF1</i><br>(-, 1e-03)   | <i>PSMB8</i><br>(+, 3e-03)    | <i>HLA-DQA2</i><br>(+, 1e-21) | <i>HLA-DRB5</i><br>(+, 1e-15) |
| CD4 <sup>+</sup> T cells<br>(naïve)                  | BLUEPRINT           | 167 | —                                                                                            | <i>CCHCR1</i><br>(+, 1e-12)     | <i>AL662844.4</i><br>(-, 1e-05) | —                               | —                               | <i>HLA-B</i><br>(+, 8e-09)   | —                             | —                             | —                             |
| CD4 <sup>+</sup> T cells<br>(naïve)                  | CEDAR               | 290 | <i>HLA-A</i><br>(+, 2e-05)                                                                   | <i>ABCF1</i><br>(+, 6e-03)      | <i>HLA-C</i><br>(+, 2e-06)      | <i>HLA-C</i><br>(-, 1e-05)      | <i>HLA-C</i><br>(-, 1e-04)      | <i>HLA-C</i><br>(+, 1e-09)   | <i>HLA-DQB1</i><br>(+, 2e-03) | <i>HLA-DRB1</i><br>(-, 3e-08) | <i>HLA-DRB1</i><br>(+, 4e-15) |
| CD4 <sup>+</sup> T cells<br>(naïve)                  | Kasela<br>(2017)    | 282 | <i>VARS2</i><br>(-, 3e-03)                                                                   | <i>HCG27</i><br>(+, 6e-06)      | <i>AGPAT1</i><br>(-, 2e-03)     | <i>VARS2</i><br>(+, 2e-07)      | <i>HCG27</i><br>(+, 5e-05)      | <i>HLA-C</i><br>(+, 3e-05)   | —                             | <i>HLA-DRB1</i><br>(-, 3e-12) | <i>HLA-DRB1</i><br>(+, 3e-12) |
| CD4 <sup>+</sup> T cells<br>(naïve)                  | Schmiedel<br>(2018) | 88  | <i>HLA-F-AS1</i><br>(+, 5e-05)                                                               | <i>CCHCR1</i><br>(+, 6e-04)     | <i>CCHRC1</i><br>(-, 4e-03)     | <i>HLA-B</i><br>(-, 5e-07)      | <i>MRPS18B</i><br>(+, 1e-03)    | <i>MPIG6B</i><br>(+, 7e-03)  | <i>HSPA1L</i><br>(-, 1e-03)   | <i>HLA-DQA1</i><br>(-, 3e-08) | <i>HLA-DRB5</i><br>(+, 8e-05) |
| CD4 <sup>+</sup> T cells<br>(anti-CD3-CD28)          | Schmiedel<br>(2018) | 88  | <i>PPP1R11</i><br>(-, 5e-03)                                                                 | <i>HLA-C</i><br>(+, 1e-03)      | <i>VWA7</i><br>(+, 2e-02)       | <i>AL645933.2</i><br>(+, 8e-03) | <i>MDC1</i><br>(-, 6e-04)       | <i>ABHD16A</i><br>(-, 2e-02) | <i>LTB</i><br>(+, 2e-02)      | <i>HLA-DQB2</i><br>(+, 2e-08) | <i>HLA-DRB5</i><br>(+, 6e-06) |



**Table S37. (Continued).**

| Tissue <sup>a</sup>                      | Study <sup>b</sup> | N   | most significant cis-eQTL result (target gene, sign risk allele effect, p-value) for variant |                               |                              |                             |                             |                              |                               |                               |                               |
|------------------------------------------|--------------------|-----|----------------------------------------------------------------------------------------------|-------------------------------|------------------------------|-----------------------------|-----------------------------|------------------------------|-------------------------------|-------------------------------|-------------------------------|
|                                          |                    |     | rs1655901                                                                                    | rs2844626                     | rs72866766                   | rs137854633                 | rs2853998                   | rs2442752                    | rs6935999                     | rs4947340                     | rs9271529                     |
| CD8 <sup>+</sup> T cells (naive)         | CEDAR              | 277 | <i>HLA-A</i><br>(+, 5e-08)                                                                   | <i>HLA-E</i><br>(+, 3e-04)    | <i>HLA-C</i><br>(-, 2e-05)   | <i>HLA-C</i><br>(-, 4e-05)  | <i>HLA-C</i><br>(-, 9e-08)  | <i>HLA-C</i><br>(+, 9e-09)   | NS                            | <i>HLA-DRB5</i><br>(-, 2e-07) | <i>HLA-DRB1</i><br>(+, 1e-15) |
| CD8 <sup>+</sup> T cells (naive)         | Kasela (2017)      | 271 | <i>HLA-A</i><br>(+, 2e-04)                                                                   | <i>ATP6V1G2</i><br>(+, 1e-03) | <i>ATAT1</i><br>(+, 5e-03)   | <i>HLA-C</i><br>(-, 2e-06)  | <i>HCG27</i><br>(+, 9e-05)  | <i>HLA-C</i><br>(+, 6e-05)   | —                             | <i>HLA-DRB1</i><br>(-, 2e-09) | <i>HLA-DRB1</i><br>(+, 2e-13) |
| CD8 <sup>+</sup> T cells (naive)         | Schmiedel (2018)   | 89  | <i>HLA-F-AS1</i><br>(+, 1e-05)                                                               | <i>CCHCR1</i><br>(+, 8e-04)   | <i>NFKBIL1</i><br>(+, 2e-02) | <i>HLA-B</i><br>(-, 3e-05)  | <i>MDC1</i><br>(-, 2e-03)   | <i>NELFE</i><br>(-, 2e-03)   | <i>LY6G5C</i><br>(-, 3e-03)   | <i>HLA-DQA2</i><br>(+, 1e-05) | <i>HLA-DRB5</i><br>(+, 7e-07) |
| CD8 <sup>+</sup> T cells (anti-CD3-CD28) | Schmiedel (2018)   | 88  | <i>GNL1</i><br>(-, 8e-05)                                                                    | <i>HCG27</i><br>(+, 1e-03)    | <i>CCHCR1</i><br>(-, 3e-03)  | <i>PRRC2A</i><br>(-, 4e-03) | <i>MDC1</i><br>(-, 4e-03)   | <i>PPP1R10</i><br>(-, 2e-04) | <i>RNF5</i><br>(-, 8e-03)     | <i>HLA-DQA1</i><br>(-, 2e-08) | <i>HLA-DRB5</i><br>(+, 2e-04) |
| T <sub>REG</sub> cells (naive)           | Schmiedel (2018)   | 89  | <i>HLA-F-AS1</i><br>(+, 2e-05)                                                               | <i>CCHCR1</i><br>(+, 7e-04)   | <i>ATAT1</i><br>(-, 3e-03)   | <i>HLA-B</i><br>(-, 2e-07)  | <i>DHX16</i><br>(+, 1e-02)  | <i>PRRT1</i><br>(-, 2e-02)   | <i>HLA-DQB2</i><br>(-, 1e-02) | <i>HLA-DQB2</i><br>(+, 2e-06) | <i>HLA-DRB5</i><br>(+, 3e-05) |
| T <sub>REG</sub> cells (memory)          | Schmiedel (2018)   | 89  | <i>HLA-F-AS1</i><br>(+, 6e-11)                                                               | <i>NRM</i><br>(-, 1e-02)      | <i>PPT2</i><br>(-, 3e-04)    | <i>MICB</i><br>(+, 2e-03)   | <i>NCR3</i><br>(-, 3e-03)   | <i>FLOT1</i><br>(-, 3e-03)   | <i>PSMB9</i><br>(-, 5e-04)    | <i>HLA-DQA2</i><br>(+, 5e-06) | <i>HLA-DRB5</i><br>(+, 9e-06) |
| T <sub>H</sub> 1 cells                   | Schmiedel (2018)   | 82  | <i>HLA-F-AS1</i><br>(+, 6e-07)                                                               | <i>CCHCR1</i><br>(+, 2e-04)   | <i>PRRC2A</i><br>(+, 4e-04)  | <i>HLA-B</i><br>(-, 2e-05)  | <i>DDX39B</i><br>(-, 2e-02) | <i>VWA7</i><br>(+, 3e-03)    | <i>HSPA1L</i><br>(-, 6e-03)   | <i>HLA-DQB2</i><br>(+, 4e-05) | <i>RXRB</i><br>(+, 8e-04)     |
| T <sub>H</sub> 1/17 cells                | Schmiedel (2018)   | 88  | <i>HLA-F-AS1</i><br>(+, 5e-09)                                                               | <i>CCHCR1</i><br>(+, 9e-03)   | <i>DDX39B</i><br>(+, 1e-03)  | <i>HLA-B</i><br>(-, 1e-06)  | <i>HLA-B</i><br>(-, 2e-02)  | <i>VWA7</i><br>(+, 2e-02)    | <i>AIF1</i><br>(-, 4e-03)     | <i>HLA-DQB2</i><br>(+, 3e-06) | <i>LY6G5C</i><br>(-, 8e-03)   |
| T <sub>H</sub> 17 cells                  | Schmiedel (2018)   | 89  | <i>HLA-F-AS1</i><br>(+, 5e-05)                                                               | <i>CCHCR1</i><br>(+, 3e-05)   | <i>DDX39B</i><br>(+, 2e-03)  | <i>HLA-B</i><br>(-, 2e-05)  | <i>FLOT1</i><br>(-, 3e-03)  | <i>TNF</i><br>(+, 2e-02)     | <i>HLA-DQB2</i><br>(-, 1e-03) | <i>HLA-DQB2</i><br>(+, 2e-07) | <i>HLA-DRB5</i><br>(+, 1e-04) |
| T <sub>H</sub> 2 cells                   | Schmiedel (2018)   | 89  | <i>HLA-F-AS1</i><br>(+, 3e-04)                                                               | <i>CCHCR1</i><br>(+, 5e-05)   | <i>DDX39B</i><br>(+, 1e-03)  | <i>HLA-B</i><br>(-, 7e-05)  | <i>HLA-B</i><br>(-, 2e-02)  | <i>TNF</i><br>(+, 2e-03)     | <i>C6orf47</i><br>(-, 5e-04)  | <i>HLA-DQA2</i><br>(+, 9e-07) | <i>HLA-DRB5</i><br>(+, 1e-05) |
| T <sub>FH</sub> cells                    | Schmiedel (2018)   | 89  | <i>HLA-F-AS1</i><br>(+, 8e-08)                                                               | <i>CCHCR1</i><br>(+, 9e-05)   | <i>DDX39B</i><br>(+, 2e-03)  | <i>HLA-B</i><br>(-, 2e-05)  | <i>SNHG32</i><br>(+, 1e-02) | <i>HLA-E</i><br>(+, 1e-03)   | <i>PSMB8</i><br>(-, 3e-03)    | <i>HLA-DQB2</i><br>(+, 8e-05) | <i>HLA-DRB5</i><br>(+, 5e-05) |

**Table S37. (Continued).**

| Tissue <sup>a</sup>                                    | Study <sup>b</sup>  | N   | most significant cis-eQTL result (target gene, sign risk allele effect, p-value) for variant |                               |                               |                                 |                                 |                             |                               |                               |                               |
|--------------------------------------------------------|---------------------|-----|----------------------------------------------------------------------------------------------|-------------------------------|-------------------------------|---------------------------------|---------------------------------|-----------------------------|-------------------------------|-------------------------------|-------------------------------|
|                                                        |                     |     | rs1655901                                                                                    | rs2844626                     | rs72866766                    | rs137854633                     | rs2853998                       | rs2442752                   | rs6935999                     | rs4947340                     | rs9271529                     |
| Monocytes                                              | BLUEPRINT           | 191 | —                                                                                            | <i>CCHCR1</i><br>(+, 2e-13)   | <i>MICA</i><br>(-, 3e-11)     | —                               | —                               | <i>HLA-B</i><br>(+, 9e-07)  | —                             | —                             | —                             |
| Monocytes                                              | CEDAR               | 286 | <i>HLA-A</i><br>(+, 4e-08)                                                                   | <i>HLA-E</i><br>(+, 2e-03)    | <i>HLA-C</i><br>(+, 6e-05)    | <i>HLA-C</i><br>(-, 2e-08)      | <i>HLA-C</i><br>(-, 7e-05)      | <i>HLA-C</i><br>(+, 3e-11)  | <i>CSNK2B</i><br>(-, 2e-02)   | <i>HLA-DRB5</i><br>(-, 3e-08) | <i>HLA-DRB1</i><br>(+, 1e-18) |
| Monocytes<br>(naïve)                                   | Quach<br>(2016)     | 200 | <i>HLA-F</i><br>(-, 1e-03)                                                                   | <i>HLA-C</i><br>(+, 1e-20)    | <i>MICA</i><br>(-, 7e-10)     | <i>HLA-B</i><br>(-, 3e-05)      | <i>AL645933.2</i><br>(-, 2e-11) | <i>HLA-C</i><br>(-, 6e-10)  | <i>AGER</i><br>(+, 2e-05)     | <i>HLA-DQA2</i><br>(+, 7e-18) | <i>HLA-DRB5</i><br>(+, 7e-20) |
| Monocytes<br>(naïve)                                   | Fairfax<br>(2014)   | 421 | <i>HLA-A</i><br>(+, 4e-20)                                                                   | <i>HCG27</i><br>(+, 1e-08)    | <i>HLA-C</i><br>(+, 4e-04)    | <i>HLA-C</i><br>(-, 2e-14)      | <i>PBX2</i><br>(-, 1e-06)       | <i>HLA-C</i><br>(+, 4e-05)  | <i>HLA-DRB1</i><br>(+, 2e-04) | <i>HLA-DRB1</i><br>(-, 4e-12) | <i>HLA-DRB1</i><br>(+, 2e-26) |
| Monocytes<br>(CD14 <sup>high</sup> CD16 <sup>-</sup> ) | Schmiedel<br>(2018) | 79  | <i>HLA-F</i><br>(-, 6e-04)                                                                   | <i>CCHCR1</i><br>(+, 5e-05)   | <i>HSPA1B</i><br>(-, 4e-03)   | <i>CSNK2B</i><br>(-, 1e-02)     | <i>EHMT2</i><br>(-, 3e-02)      | <i>GPANK1</i><br>(-, 4e-03) | <i>HLA-DQA1</i><br>(+, 2e-03) | <i>HLA-DQA2</i><br>(+, 3e-08) | <i>HLA-DRB5</i><br>(+, 2e-03) |
| Monocytes<br>(CD14 <sup>-</sup> CD16 <sup>+</sup> )    | Schmiedel<br>(2018) | 90  | <i>HLA-F-AS1</i><br>(+, 1e-03)                                                               | <i>PSORS1C3</i><br>(-, 2e-02) | <i>DDX39B</i><br>(+, 6e-03)   | <i>HLA-B</i><br>(-, 2e-04)      | <i>CSNK2B</i><br>(+, 8e-03)     | <i>FLOT1</i><br>(-, 3e-03)  | <i>HSPA1L</i><br>(-, 1e-03)   | <i>HLA-DQA2</i><br>(+, 2e-08) | <i>HLA-DQA1</i><br>(+, 9e-05) |
| Monocytes<br>(LPS stim.)                               | Quach<br>(2016)     | 184 | <i>HLA-F</i><br>(-, 3e-02)                                                                   | <i>HLA-C</i><br>(+, 7e-15)    | <i>MICA</i><br>(-, 2e-07)     | <i>HLA-B</i><br>(-, 2e-05)      | <i>AL645933.2</i><br>(-, 5e-08) | <i>HLA-C</i><br>(-, 1e-06)  | <i>CSNK2B</i><br>(-, 4e-04)   | <i>HLA-DQA1</i><br>(-, 3e-13) | <i>HLA-DRB5</i><br>(+, 2e-17) |
| Monocytes<br>(Pam <sub>3</sub> CSK <sub>4</sub> stim.) | Quach<br>(2016)     | 196 | <i>HLA-F</i><br>(-, 9e-03)                                                                   | <i>HLA-C</i><br>(+, 3e-18)    | <i>MICA</i><br>(-, 3e-07)     | <i>HLA-B</i><br>(-, 3e-03)      | <i>AL645933.2</i><br>(-, 3e-09) | <i>HLA-C</i><br>(-, 1e-06)  | <i>AGER</i><br>(+, 5e-03)     | <i>HLA-DQA1</i><br>(-, 2e-16) | <i>HLA-DRB5</i><br>(+, 3e-18) |
| Monocytes<br>(R848 stim.)                              | Quach<br>(2016)     | 191 | <i>HLA-F</i><br>(-, 6e-04)                                                                   | <i>HLA-C</i><br>(+, 7e-09)    | <i>MICA</i><br>(-, 9e-08)     | <i>HLA-B</i><br>(-, 2e-09)      | <i>AL645933.2</i><br>(-, 2e-09) | <i>HLA-C</i><br>(-, 7e-06)  | <i>AGER</i><br>(+, 5e-03)     | <i>HLA-DQA2</i><br>(+, 8e-14) | <i>HLA-DRB5</i><br>(+, 7e-17) |
| Monocytes<br>(IAV stim.)                               | Quach<br>(2016)     | 198 | <i>HLA-F</i><br>(-, 1e-03)                                                                   | <i>HLA-C</i><br>(+, 1e-11)    | <i>MICA</i><br>(-, 4e-09)     | <i>AL671883.3</i><br>(+, 4e-09) | <i>AL645933.2</i><br>(-, 8e-09) | <i>HLA-C</i><br>(-, 1e-05)  | <i>HLA-DOB</i><br>(-, 6e-04)  | <i>HLA-DQA2</i><br>(+, 1e-22) | <i>HLA-DRB5</i><br>(+, 2e-19) |
| Monocytes<br>(IFN24 stim.)                             | Fairfax<br>(2014)   | 370 | <i>HLA-A</i><br>(+, 1e-08)                                                                   | <i>LST1</i><br>(+, 6e-05)     | <i>HLA-C</i><br>(+, 4e-03)    | <i>HLA-C</i><br>(-, 2e-10)      | <i>HLA-C</i><br>(-, 1e-06)      | <i>HLA-C</i><br>(+, 4e-05)  | <i>STK19</i><br>(+, 3e-04)    | <i>HLA-DRB5</i><br>(-, 1e-11) | <i>HLA-DRB1</i><br>(+, 1e-28) |
| Monocytes<br>(LPS2 stim.)                              | Fairfax<br>(2014)   | 256 | <i>HLA-A</i><br>(+, 2e-22)                                                                   | <i>VARS2</i><br>(-, 3e-04)    | <i>ATP6V1G2</i><br>(-, 3e-03) | <i>HLA-C</i><br>(-, 2e-08)      | <i>HLA-C</i><br>(-, 4e-07)      | <i>HLA-C</i><br>(+, 9e-03)  | <i>DDX39B</i><br>(-, 3e-03)   | <i>HLA-DRB5</i><br>(-, 4e-08) | <i>HLA-DRB1</i><br>(+, 6e-22) |
| Monocytes<br>(LPS24 stim.)                             | Fairfax<br>(2014)   | 325 | <i>HLA-A</i><br>(+, 8e-18)                                                                   | <i>C2</i><br>(+, 1e-04)       | <i>SNHG32</i><br>(-, 3e-03)   | <i>VARS2</i><br>(+, 8e-09)      | <i>HLA-C</i><br>(-, 5e-07)      | <i>HLA-C</i><br>(+, 1e-04)  | <i>HLA-DRB1</i><br>(+, 3e-03) | <i>HLA-DRB1</i><br>(-, 3e-11) | <i>HLA-DRB1</i><br>(+, 5e-20) |

**Table S37. (Continued).**

| Tissue <sup>a</sup>                                 | Study <sup>b</sup> | N   | most significant cis-eQTL result (target gene, sign risk allele effect, p-value) for variant |                                 |                                 |                             |                                 |                               |                               |                               |                                 |
|-----------------------------------------------------|--------------------|-----|----------------------------------------------------------------------------------------------|---------------------------------|---------------------------------|-----------------------------|---------------------------------|-------------------------------|-------------------------------|-------------------------------|---------------------------------|
|                                                     |                    |     | rs1655901                                                                                    | rs2844626                       | rs72866766                      | rs137854633                 | rs2853998                       | rs2442752                     | rs6935999                     | rs4947340                     | rs9271529                       |
| Macrophages (naïve)                                 | Alasoo (2018)      | 84  | <i>TRIM26</i><br>(+, 8e-03)                                                                  | <i>RNF5</i><br>(-, 1e-03)       | <i>MICA</i><br>(-, 1e-05)       | <i>HLA-C</i><br>(-, 2e-04)  | <i>RNF5</i><br>(-, 8e-05)       | <i>RNF5</i><br>(+, 7e-03)     | —                             | <i>HLA-DRB1</i><br>(-, 3e-05) | <i>SAPCD1-AS1</i><br>(-, 5e-03) |
| Macrophages (naïve)                                 | Nedelec (2016)     | 163 | <i>HLA-G</i><br>(-, 5e-04)                                                                   | <i>HLA-C</i><br>(+, 4e-07)      | <i>MICA</i><br>(-, 4e-05)       | <i>MICB</i><br>(+, 3e-03)   | <i>AL645933.2</i><br>(-, 3e-05) | <i>PSORS1C3</i><br>(+, 3e-04) | <i>RING1</i><br>(+, 8e-03)    | <i>HLA-DQA2</i><br>(+, 1e-17) | <i>HLA-DRB5</i><br>(+, 2e-10)   |
| Macrophages (IFN $\gamma$ )                         | Alasoo (2018)      | 84  | <i>AL645939.5</i><br>(+, 2e-03)                                                              | <i>AL645933.2</i><br>(-, 4e-03) | <i>PRR3</i><br>(+, 1e-04)       | <i>HLA-B</i><br>(-, 6e-10)  | <i>CCHCR1</i><br>(-, 3e-03)     | <i>LTA</i><br>(-, 2e-04)      | —                             | <i>HLA-DQA2</i><br>(+, 7e-11) | <i>PSMB9</i><br>(-, 6e-06)      |
| Macrophages (Salmonella)                            | Alasoo (2018)      | 84  | <i>RPP21</i><br>(+, 4e-03)                                                                   | <i>PPP1R10</i><br>(-, 2e-03)    | <i>MICA</i><br>(-, 2e-05)       | <i>HLA-B</i><br>(-, 6e-07)  | <i>C2</i><br>(+, 3e-02)         | <i>IER3</i><br>(-, 5e-03)     | —                             | <i>HLA-DRB1</i><br>(-, 3e-06) | <i>HLA-DQA1</i><br>(-, 8e-10)   |
| Macrophages (IFN $\gamma$ +Salmonella)              | Alasoo (2018)      | 84  | <i>TRIM26</i><br>(+, 6e-04)                                                                  | <i>CSNK2B</i><br>(+, 5e-03)     | <i>HSPA1B</i><br>(-, 2e-03)     | <i>HLA-B</i><br>(-, 5e-08)  | <i>HSPA1L</i><br>(-, 2e-02)     | <i>RNF5</i><br>(+, 3e-03)     | —                             | <i>HLA-DRB1</i><br>(-, 2e-08) | <i>PSMB9</i><br>(-, 6e-04)      |
| Macrophages (Listeria)                              | Nedelec (2016)     | 163 | <i>PPP1R11</i><br>(-, 3e-04)                                                                 | <i>HLA-C</i><br>(+, 9e-06)      | <i>MICA</i><br>(-, 6e-05)       | <i>TNF</i><br>(-, 2e-03)    | <i>AL645933.2</i><br>(-, 2e-06) | <i>DDX39B</i><br>(+, 5e-04)   | <i>BAG6</i><br>(+, 7e-03)     | <i>HLA-DQA2</i><br>(+, 1e-15) | <i>HLA-DRB5</i><br>(+, 3e-12)   |
| Macrophages (Salmonella)                            | Nedelec (2016)     | 167 | <i>HLA-G</i><br>(-, 2e-04)                                                                   | <i>HLA-C</i><br>(+, 7e-08)      | <i>MICA</i><br>(-, 3e-04)       | <i>MICB</i><br>(+, 1e-03)   | <i>AL645933.2</i><br>(-, 1e-05) | <i>HLA-C</i><br>(-, 3e-03)    | <i>TAP2</i><br>(-, 1e-02)     | <i>HLA-DQA2</i><br>(+, 4e-12) | <i>HLA-DRB5</i><br>(+, 1e-11)   |
| Neutrophils (CD66b <sup>+</sup> CD16 <sup>+</sup> ) | BLUEPRINT          | 196 | —                                                                                            | <i>AL645933.2</i><br>(-, 2e-08) | <i>AL645933.2</i><br>(-, 5e-09) | —                           | —                               | <i>HLA-B</i><br>(+, 2e-12)    | —                             | —                             | —                               |
| Neutrophils (CD15 <sup>+</sup> )                    | CEDAR              | 280 | <i>HLA-A</i><br>(+, 2e-05)                                                                   | <i>HCG27</i><br>(+, 4e-04)      | <i>HLA-C</i><br>(+, 2e-06)      | <i>LST1</i><br>(-, 1e-04)   | <i>HCG27</i><br>(+, 3e-05)      | <i>HLA-C</i><br>(+, 3e-08)    | <i>AGPAT1</i><br>(+, 2e-03)   | <i>HLA-DRB1</i><br>(-, 4e-05) | <i>HLA-DMA</i><br>(-, 1e-07)    |
| Neutrophils (CD16 <sup>+</sup> )                    | Naranbhai (2015)   | 93  | <i>HCG9</i><br>(+, 3e-10)                                                                    | <i>PSORS1C3</i><br>(-, 7e-04)   | <i>HLA-C</i><br>(+, 1e-02)      | <i>GPANK1</i><br>(+, 8e-03) | <i>HSPA1A</i><br>(+, 4e-03)     | <i>PSORS1C3</i><br>(+, 1e-03) | <i>HLA-DRB1</i><br>(+, 3e-03) | <i>HLA-DRB1</i><br>(-, 2e-03) | <i>HLA-DRB1</i><br>(+, 1e-04)   |

Abbreviations: IAV, influenza A virus; IFN $\gamma$ , interferon gamma; LPS, lipopolysaccharide; LPS2, 2 h LPS stimulation; LPS24, 24 h LPS stimulation; N, number of samples; NS (FDR > 0.05 for GTEx; p > 0.05 for all other studies); Pam<sub>3</sub>CSK<sub>4</sub>, Pam3CysSerLys4; PHA, phytohemagglutinin; PsV, psoriasis vulgaris; R848, resiquimod.

<sup>a</sup>Tissues with relevance to psoriasis (skin, fibroblasts, whole blood, B cells, LCLs, NK cells, T cells, monocytes, macrophages, neutrophils) were selected.

<sup>b</sup>Results compiled from 16 different RNA expression studies, including PsV RNAseq,<sup>17</sup> GTEx,<sup>18</sup> the eQTLGen consortium,<sup>19</sup> as well as public datasets whose eQTLs were recomputed by the eQTL Catalogue,<sup>20</sup> including Alasoo *et al.*,<sup>21</sup> BLUEPRINT,<sup>22</sup> CEDAR,<sup>23</sup> GENCORD,<sup>24</sup> Fairfax *et al.*,<sup>25,26</sup> GEUVADIS,<sup>27</sup> Kasela *et al.*,<sup>28</sup> Lepik *et al.*,<sup>29</sup> Naranbhai *et al.*,<sup>30</sup> Nedelec *et al.*,<sup>31</sup> Quach *et al.*,<sup>32</sup> and TwinsUK.<sup>33</sup>

**Table S38. Functional annotation of noncoding psoriasis-associated MHC variants with a Bayesian posterior probability exceeding 0.50.**

| Variant     | Ancestry | PP    | Nearest Gene (position)               | Conservation <sup>a</sup> |        |        |                  | TF <sup>b</sup>       |                         | Chromatin state <sup>c</sup> |                        |                | RegulomeDB rank <sup>d</sup> | RegulomeDB score <sup>e</sup> | CADD Phred <sup>f</sup> |
|-------------|----------|-------|---------------------------------------|---------------------------|--------|--------|------------------|-----------------------|-------------------------|------------------------------|------------------------|----------------|------------------------------|-------------------------------|-------------------------|
|             |          |       |                                       | PhastCons                 | PhyloP | Gerp++ | SiPhy- $\pi$ lod | No. bound TF proteins | No. altered TFBS motifs | Promoter histone marks       | Enhancer histone marks | DNase HS sites |                              |                               |                         |
| rs1655901   | EUR      | 1.000 | <i>HLA-A</i> (3.1 kb downstream)      | 0.03                      | 0.38   | 0.36   | 0                | 1                     | 2                       | 0                            | 2                      | 2              | 3a                           | 0.55                          | 12.3                    |
| rs2844626   | SAS+EUR  | 0.541 | <i>HLA-C</i> (7.0 kb downstream)      | 0.00                      | -0.66  | 0.20   | 0                | 0                     | 6                       | 0                            | 0                      | 0              | 1f                           | 0.84                          | 7.3                     |
| rs72866766  | EUR      | 1.000 | <i>HLA-B</i> (468 bp downstream)      | 0.00                      | -0.61  | 1.37   | 0                | 2                     | 0                       | 1                            | 6                      | 4              | 4                            | 0.61                          | 9.7                     |
| rs137854633 | EUR      | 0.543 | <i>HLA-B</i> (intron 1)               | 0.00                      | -0.03  | 0.62   | 6.6              | 10                    | 0                       | 24                           | 1                      | 16             | 3a                           | 0.79                          | 11.2                    |
| rs2853998   | SAS+EUR  | 0.942 | <i>HLA-B</i> (2.2 kb upstream)        | 0.00                      | -0.82  | 0.12   | 0                | 0                     | 0                       | 0                            | 3                      | 0              | 4                            | 0.61                          | 5.5                     |
| rs2442752   | SAS      | 0.583 | <i>AL671883.3</i> (7.9 kb downstream) | 0.01                      | 0.15   | 0.00   | 0                | 0                     | 0                       | 0                            | 1                      | 0              | 1f                           | 0.22                          | 8.5                     |
| rs6935999   | EUR      | 0.752 | <i>HLA-DRA</i> (15 kb upstream)       | 0.02                      | 0.52   | 0.37   | 0                | 0                     | 4                       | 0                            | 2                      | 2              | 7                            | 0.18                          | 1.6                     |
| rs4947340   | EUR      | 0.965 | <i>HLA-DRA</i> (23 kb upstream)       | 0.54                      | 0.12   | 0.00   | 0                | 0                     | 1                       | 0                            | 0                      | 0              | 5                            | 0.59                          | 11.0                    |
| rs9271539   | SAS+EUR  | 0.562 | <i>HLA-DQA1</i> (15.1 kb upstream)    | 0.00                      | -3.17  | -5.27  | 0                | 0                     | 2                       | 1                            | 5                      | 3              | 2b                           | 0.69                          | 6.2                     |

Abbreviations: HS, hypersensitivity; PP, posterior probability (Bayesian); TF, transcription factor; TFBS, transcription factor binding site

<sup>a</sup>PhastCons, PhyloP and Gerp++ evolutionary conservation scores based on tracks phastCons100way, phyloP100wayAll and allHg19RS\_BW, respectively, from the UCSC table browser.<sup>34</sup> SiPhy- $\pi$  lod scores were downloaded from supplemental information for Lindblad-Toh *et al.*<sup>35</sup> SiPhy- $\pi$  lod scores with an FDR > 10% were considered non-significant and are represented with a 0 score.

<sup>b</sup>Number of bound transcription factors and number of altered transcription factor binding site motifs; based on v 4.1 of HaploReg.<sup>36</sup>

<sup>c</sup>Number of cell types with promoter histone marks, enhancer histone marks, or DNase hypersensitivity sites; based on v 4.1 of HaploReg.<sup>36</sup>

<sup>d</sup>Rank from v2.0 of RegulomeDB:<sup>37</sup> 1f = likely to affect binding and linked to expression of a gene target (eQTL + TF binding/DNase peak), 2b = likely to affect binding (TF binding + any motif + DNase footprint + DNase peak), 3a = less likely to affect binding (TF binding + any motif + DNase peak), 4 = minimal binding evidence (TF binding + DNase peak), 5 = minimal binding evidence (TF binding or DNase peak), 6 = minimal binding evidence (Motif hit), 7 = uncurated region.

<sup>e</sup>Probability score from v 2.0 of Regulome DB,<sup>37</sup> ranging from 0–1, of the likelihood of being a regulatory variant.

<sup>f</sup>Weighted mean Phred score from v 1.6 of CADD,<sup>38</sup> an indicator of variant deleteriousness.

## Supplemental methods

### Additional methods for construction of SNP2HLA reference panels

We constructed an additional 18 SNP2HLA reference panels for imputing our South Asian GWAS samples by rebuilding existing HLA reference panels and by forming various combinations of the UM, IKMB-SAS and BKT components of the 397-person SAS panel with four other datasets—the non-SAS subset of the multiethnic IKMB reference panel, the European ancestry Type 1 Diabetes Genetics Consortium (T1DGC) SNP2HLA panel,<sup>8-10</sup> the pan-Asian SNP2HLA panel,<sup>11,12</sup> and data from phase 3 of the 1000 Genomes Project (1KGP).<sup>13,14</sup> HLA genotypes for 1KGP were combined separately with both microarray-based (v1) and sequence-based (v2) MHC genotypes for both the full 1KGP dataset (1KGP-ALL) and its SAS subset (1KGP-SAS), resulting in four versions of 1KGP data used for construction of South Asian panels: 1KGP-ALL-v1, 1KGP-SAS-v1, 1KGP-ALL-v2, 1KGP-SAS-v2 with 2666, 541, 2504 and 489 individuals, respectively. After removal of the 141 Indian samples used for our original South Asian panel, the IKMB panel dataset consisted of genotypes for 8,803 MHC SNPs and two-field genotypes of eight HLA genes for 1,217 people of European, East Asian, African-American and Iranian ancestry along with two additional Indian individuals. For the T1DGC panel we procured the datasets of genotypes for eight HLA genes and 5,868 MHC SNPs for 5,225 people that were used to construct the original panel;<sup>9</sup> for the pan-Asian panel we extracted genotypes for eight HLA genes and 6,173 MHC SNPs for 530 individuals of Chinese, Japanese, Tamil Indian or Malaysian ancestry from the published panel;<sup>11,12</sup> see Web Resources. Recently-published 2-field genotypes of five HLA genes (*HLA-A*, *-B*, *-C*, *-DQB1*, *-DRB1*) for 2,693 samples of phase 3 of the 1000 Genomes Project;<sup>14</sup> see Web Resources) were processed by downcoding ambiguous 2-field allele designations to their 1-field equivalent and setting genotypes with ambiguous 1-field

and 2-field designations to missing. Genotypes of SNPs in the MHC region were drawn from two sources—the reduced set of sequence-based integrated variant calls for version 5 of the phase 3 release and genotype data typed on the Affymetrix 6.0 microarray (Web Resources). Genotypes for all 2,124 variants in the chr6:29-34 Mb interval were extracted from the Affymetrix 6.0 microarray data, as were genotypes for all 63,106 SNPs with  $MAF \geq 0.01$  in this same interval that were present in the sequence-based integrated variant call set. We decided to use the much sparser microarray data in addition to the sequence-based calls because of high error rates for sequence-based SNP genotype calls in HLA genes that has been reported for phase 1 1000 Genomes data, which was caused by a strong mapping bias that overestimates reference allele frequencies.<sup>39</sup>

Three published HLA panels (IKMB, T1DGC, pan-Asian) were rebuilt from their component HLA and MHC genotypes with our updated MakeReference script and updated HLA SNP and amino acid sequence dictionaries. SNP2HLA panels for the four phase 3 1000 Genome datasets we created (1KGP-ALL-v1, 1KGP-SAS-v1, 1KGP-ALL-v2, 1KGP-SAS-v2) were also constructed with our updated method. Finally, we merged MHC genotypes for eleven combinations of the seven datasets previously described by identifying for each pair of datasets in a combination the set of shared MHC SNPs where we could confidently match strand orientation and where allele frequencies differed by no more than 0.15 or 0.30 between datasets of similar or dissimilar ancestries, respectively. 2-field HLA genotypes from datasets were combined by simple concatenation, with missing values for genes not typed in a particular dataset. SNP2HLA panels were then built for each combination by processing the merged MHC and HLA genotypes with the updated MakeReference method. By default, the MakeReference

script removes SNPs that violate Hardy-Weinberg equilibrium ( $p < 1 \times 10^{-6}$ ); this quality control filter was imposed only for panels where all individuals have the same continental ancestry.

We also built 20 SNP2HLA reference panels for imputation of HLA variants in people of European ancestry by the same methods just described for South Asians. Datasets used for these panels consisted of many of those used for South Asians (T1DGC, UM, BKT, IKMB, 1KGP-ALL-v1, 1KGP-ALL-v2) as well as the EUR subset of phase 3 1KGP with HLA and either microarray or sequence-based MHC data (1KGP-EUR-v1 and 1KGP-EUR-v2 with 526 and 503 people, respectively).

For all SNP2HLA reference panels created for this study, we requested 10 burn-in iterations of the Beagle 4.0 phasing algorithm followed by 25 iterations of the more accurate phasing algorithm of Beagle 4.1.

### **Additional methods for validation of SNP2HLA reference panels**

The relative performance of SNP2HLA reference panels for imputing into datasets of South Asian and European ancestry was assessed as follows. For each ancestry, panels were compared as two different groups—the full set of 19 South Asian or 20 European panels with genotypes for five HLA genes (*HLA-A*, *-B*, *-C*, *-DQB1*, *-DRB1*), and the subset of 11 South Asian or 7 European panels with genotypes for eight HLA genes (including *HLA-DQA1*, *HLA-DPA1* and *HLA-DQB1*). The 11 South Asian panels with genotyping for all eight HLA genes were assessed separately for their accuracy of *HLA-DQA1* imputation vs. their accuracy of *HLA-DPA1* and *HLA-DPB1* imputation because the method of *HLA-DQA1* genotyping for two of the component datasets of many of these panels (T1DGC and pan-Asian) could not discriminate several commonly occurring 2-field alleles from each other. Similar separate assessment of *HLA-DQA1* imputation accuracy was carried out for the 7 European panels with genotyping for all eight

genes, but because we had no independent *HLA-DPA1/DPB1* genotypes for Europeans we instead used the mean imputation performance for *HLA-A, -B, -C, -DQB1* and *-DRB1* as a proxy.

The relative performance of each panel within a set of panels being compared was assessed as its mean rank across 12 metrics consisting of three paired-sample comparison measures based on the Wilcoxon signed rank test (mean rank-biserial correlation, no. paired comparisons where rank sum of panel *i* > rank sum of panel *j*, no. paired comparisons where rank sum of panel *i* is significantly > rank sum of panel *j*) and three paired-sample comparison measures based on the paired t-test (mean paired difference, no. pairs where the mean difference of panel *i* minus panel *j* is > 0, no. pairs where mean difference of panel *i* – panel *j* is significantly > 0 based on bootstrapping); each of these six paired-sample measures was applied to both per-individual and per-allele imputation accuracies. For the SAS panels, which were evaluated with a single validation set, mean ranks for the 12 metrics were determined for 2-field imputed alleles of each of the eight HLA genes and then separately averaged across all genes within each of the three gene sets for which panels were tested (*HLA-A,B,C,DQB1,DRB1*; *HLA-DPA1,DPB1*; *HLA-DQA1*). For the EUR panels, mean ranks for the 12 metrics were first determined for each combination of the eight HLA genes and four validation sets, a validation set size weighted mean was then determined for each gene across the validation sets, and then unweighted mean ranks were computed across all genes in each of the three gene sets.

### **Additional methods for association analysis of MHC variants**

Association testing was restricted to variants with a predicted  $r^2$  imputation quality of at least 0.7 for all *K* case-control studies in an analysis. We identified candidate variants for the multiple independent psoriasis association signals in the MHC region using a stepwise regression approach that combines iterative forward selection of the best variant meeting a



significance threshold with backward elimination at each step of the worst included variant if it is no longer significant. We used the same cutoff probability for adding and removing variables, with the proviso that for inclusion the p-value of the variant must be  $\leq$  cutoff probability and for elimination the p-value must be  $>$  cutoff probability. The specific cutoff probability for each stepwise analysis was based on the number of effectively independent variants tested, which was in turn estimated using the LD-pruning function of Plink 1.9 with an  $r^2$  threshold of 0.3, as recommended by Sobota *et al.*<sup>40</sup> We estimated the number of effectively independent tested variants as 3499, 2305, and 1609 for the South Asian, European, and transethnic analyses, respectively, resulting in Bonferroni-adjusted cutoff probabilities of  $1.4 \times 10^{-5}$ ,  $2.2 \times 10^{-5}$ , and  $3.1 \times 10^{-5}$ .

Most downstream analyses of the regression models fitted by this procedure made use of full model association statistics. For candidate variants in the final regression model these are simply the magnitude and variance of their  $\beta$  coefficients. Full model association statistics for all other variants constituting the broader association peak surrounding a candidate variant were derived by refitting the regression model after dropping that candidate variant but leaving all other candidate variants and covariates intact.

### **Selection and processing of imputed multiallelic variants**

Before selecting multiallelic MHC variants, which are represented in the 1KGP and HRC panels by sets of biallelic splits for each of the alternate alleles, we first augmented them by computing and adding for each variant dosages of a biallelic split that treats the reference allele as the alternate allele. This augmentation served several purposes—all  $m$  biallelic splits of a variant with  $m$  alleles were needed to compute LD between it and other variants, testing all  $m$  biallelic splits of the multiallelic G1K and HRC panel variants individually in addition to jointly

testing their  $m - 1$  set provided a more comprehensive assessment of their association, and representing 1KGP and HRC multiallelic variants by sets of  $m$  rather than  $m - 1$  biallelic splits harmonized their treatment with that of multiallelic HLA variants in the SNP2HLA reference panels. The imputed dosage of the biallelic split for the reference allele was computed as  $\max(0, 2 - \sum_{a=1}^{m-1} x_{ia})$ , where  $x_{ia}$  is the imputed dosage for biallelic split  $a$  of individual  $i$  and  $m - 1$  is the number of alternate alleles for the variant. Study-specific imputation quality ( $r^2$ ) for each augmented biallelic split was estimated as the ratio of the observed sample variance of the computed dosages for that study to their expected variance based on observed allele frequencies and an assumption of Hardy-Weinberg equilibrium. For 1KGP multiallelic variants, the summation term for the dosage computation rarely (0.0065% of the time) produced negative dosages, and the mean and minimum of these negative dosages ( $-0.0018$  and  $-0.081$ , respectively) were small enough to be explained by roundoff error. For HRC multiallelic variants, however, the summation for the computed dosages was frequently (5.92%) negative, with a very large mean and minimum for negative dosages ( $-0.594$  and  $-3.963$ , respectively), indicating a serious issue with many of these variants in the HRC panel. In fact, we identified 249 problematic HRC multiallelic SNPs in the extended MHC region based on the criterion of its augmented biallelic split having at least one computed dosage  $< -0.10$ ; these SNPs were removed from further consideration. After augmentation, from the extracted HRC-imputed datasets we selected only those multiallelic variants unique to the HRC panel; dosages for all other multiallelic variants (those unique to 1KGP and those shared by both panels) were selected from the 1KGP-imputed datasets.

### **Principal components analysis of South Asians**

We performed principal components analysis (PCA) for 6,420 individuals of various South Asian ancestries drawn from four different sources: (i) 1,807 people of Indian ancestry collected in New Delhi with 902,747 genotyped autosomal variants from batch 1 of our psoriasis GWAS, (ii) 2,503 people of Pakistani and Indian ancestry with 501,166 genotyped autosomal variants from the combined batches 2 and 3 of the psoriasis GWAS, (iii) 1,621 ImmunoChip-typed North Indians with 187,115 genotyped autosomal variants that were part of a large meta-analysis of inflammatory bowel disease,<sup>6</sup> and (iv) 489 South Asians with 47,109,439 sequence-based autosomal variants from a reduced set (no monomorphic or singleton sites) of version 5 of the phase 3 release of the 1000 Genomes Project<sup>13</sup> (see Web Resources). Individuals and variants in the psoriasis GWAS and IBD ImmunoChip datasets had first passed all standard sample and variant quality control filters, including removal of population outliers. Datasets were merged successively, in the order given (i.e., the first two sets were merged, then this combined set with the third, etc.). At each step, genotypes for variants common to both datasets were combined provided they were biallelic autosomal SNPs with a difference in MAF of  $\leq 0.15$  (after strand flipping if necessary), with an additional stipulation that the mean MAF of A/T and C/G SNPs was no more than 0.40. 14,499 genotyped SNPs common to all 6,420 individuals remained after merging, which were further processed by removing variants in regions of known psoriasis susceptibility, with a MAF  $< 0.005$ , or within large chromosomal inversions, and then LD pruning to quasi-independence with the *-indep-pairwise* command of Plink 1.9 (parameters set to window size = 1500, step size = 150, and  $r^2$  threshold = 0.20). PCA was then performed with Plink 1.9.

### **Phenotypic variance explained**

For biallelic MHC variants detected by this study, we used a liability threshold model to compute separately for each variant the percent variance of liability for disease explained.<sup>16</sup> Relative risk was approximated by the log-additive OR from the final full regression model, frequency of the risk allele in the underlying population was estimated as a weighted average of its frequency in psoriasis cases and unaffected controls (weights = 0.015 and 0.985 for Europeans and 0.003 and 0.997 for South Asians, respectively), and the population prevalence of psoriasis in Europeans and South Asians was assumed to be 0.015 and 0.003 based on estimates from the Global Psoriasis Atlas;<sup>41</sup> see Web Resources. For multiallelic variants we applied a multiallelic extension of this biallelic method.<sup>42</sup>

### **MHC variant annotation**

Basic functional annotation of variants in the MHC region was performed using the UCSC Variant Annotation Integrator tool<sup>43</sup> with the basic gene annotation set from GENCODE Version 31<sup>44</sup> that has been lifted over to hg19 reference assembly coordinates. The UCSC Table Browser<sup>34</sup> was used to extract PhastCons, PhyloP, and Gerp++ conservation scores, from hg19 reference assembly tracks phastCons100way, phyloP100wayAll, allHg19RS\_BW, and cpGIslandExt, respectively. SiPhy- $\pi$  lod scores, a measure of evolutionary constraint, were downloaded from the supplemental data of Linblad-Toh *et al.*<sup>35</sup> Version 4.1 of HaploReg<sup>36</sup> was used to determine how many cell types among the ENCODE and Roadmap reference epigenomes have promoter histone marks, enhancer histone marks, or DNase I hypersensitive sites overlapping a variant, as well as ChIP-seq evidence of transcription factors that bind to the interval containing the variant, and which transcription factor binding site motifs are changed by a variant. Version 2.0 of RegulomeDB<sup>37</sup> was used to obtain scores of how likely it is that a variant has regulatory function, and version 1.6 of CADD<sup>38</sup> provided scores of variant

deleteriousness. The overlap of associated variants with chromatin states of 33 cell types relevant to psoriasis, which were derived from a 15-state segmentation model based on five chromatin marks, was based on results of analyses generated by the Roadmap Epigenomics Project.<sup>45</sup> Results for cis-eQTLs were compiled from 16 RNA expression studies for 58 tissues and cells types with relevance to psoriasis, including our RNA-seq study of psoriatic and normal skin,<sup>17</sup> GTEx,<sup>18</sup> the eQTLGen Consortium,<sup>19</sup> as well as multiple public datasets whose eQTLs were recomputed by the eQTL Catalogue,<sup>20</sup> including BLUEPRINT,<sup>22</sup> CEDAR,<sup>23</sup> GENCORD,<sup>24</sup> TwinsUK<sup>33</sup> and several others.<sup>21,25-32</sup>

### **Enrichment analysis**

Two MHC variant enrichment analyses were performed. The first compared counts of different types of MHC variants in the final full regression model for each ethnic dataset with the corresponding variant counts for the full set of MHC variants tested for association. The second compared counts of variant types within the MHC region to their counts in the whole genome based on all autosomal variants in release 5 of phase 3 of the 1000 Genomes Project;<sup>13</sup> this was done separately for all 2504 individuals in 1000 Genomes, the 489 South Asian ancestry individuals, and the 503 European ancestry individuals. For association-tested MHC variants, variant types were determined based on the nature of their alleles, and functional annotations were determined with the UCSC Variant Annotation Integrator. For phase 3 1000 Genomes variants, variant types were extracted from the VCF files for the full integrated variant call set, and functional annotations were determined from filtered annotation files produced using the Ensembl Variant Effect Predictor (see Web Resources).

Fold-enrichment for each variant type was computed as the ratio of the proportion of that type in the target set (final regression model or MHC region) to the proportion of that type

in the background set (association-tested variants or whole genome). The significance of enrichment was determined using an upper-tailed hypergeometric test.

## Supplemental web resources

- 1000 Genomes, phase 3, Affymetrix 6.0 microarray data, [http://ftp.1000genomes.ebi.ac.uk/vol1/ftp/release/20130502/supporting/hd\\_genotype\\_chip/](http://ftp.1000genomes.ebi.ac.uk/vol1/ftp/release/20130502/supporting/hd_genotype_chip/)
- 1000 Genomes, phase 3, functional annotations, [http://ftp.1000genomes.ebi.ac.uk/vol1/ftp/release/20130502/supporting/functional\\_annotation/filtered/](http://ftp.1000genomes.ebi.ac.uk/vol1/ftp/release/20130502/supporting/functional_annotation/filtered/)
- 1000 Genomes, phase 3, HLA genotypes, [http://ftp.1000genomes.ebi.ac.uk/vol1/ftp/data\\_collections/HLA\\_types/](http://ftp.1000genomes.ebi.ac.uk/vol1/ftp/data_collections/HLA_types/)
- 1000 Genomes, v5 phase3, reduced integrated variant call set (no monomorphic or singleton sites), <http://csg.sph.umich.edu/abecasis/MACH/download/1000G.Phase3.v5.html>
- Beagle 4.1, [https://faculty.washington.edu/browning/beagle/b4\\_1.html](https://faculty.washington.edu/browning/beagle/b4_1.html)
- CADD v1.6, <https://cadd.gs.washington.edu/>
- eQTL Catalogue, <https://www.ebi.ac.uk/eqtl/>
- eQTLGen Consortium, <https://www.eqtlgen.org/>
- Global Psoriasis Atlas, <https://globalpsoriasisatlas.org/statistics/prevalence?>
- GTEx Portal, <https://www.gtexportal.org/home/>
- HaploReg v4.1, <https://pubs.broadinstitute.org/mammals/haploreg/haploreg.php>
- ImmPort list of immune-related genes, <https://www.immport.org/home>
- Pan-Asian SNP2HLA reference panel, <http://software.broadinstitute.org/mpg/snp2hla/>
- Plink 1.9, <https://www.cog-genomics.org/plink/>
- RegulomeDB 2.0, <https://regulomedb.org/regulome-search/>
- Roadmap Epigenomics Project, core 15-state model, [https://egg2.wustl.edu/roadmap/web\\_portal/chr\\_state\\_learning.html#core\\_15state](https://egg2.wustl.edu/roadmap/web_portal/chr_state_learning.html#core_15state)
- SiPhy- $\pi$  scores, <https://www.broadinstitute.org/mammals-models/29-mammals-project-supplementary-info>
- T1DGC SNP2HLA reference panel, <https://repository.niddk.nih.gov/studies/t1dgc-special/>
- UCSC Table Browser, <https://genome.ucsc.edu/cgi-bin/hgTables>

## Supplemental References

1. Luo, M., Kanai, M., Chow, W., Li, X., Yamamoto, K., Ogawa, K., Gutierrez-Arcelus, M., Gregersen, P.K., Stuart, P.E., Elder, J.T., et al. (2021). A high-resolution HLA reference panel capturing global population diversity enables multi-ethnic fine-mapping in HIV host response. *Nature Genetics* in press.
2. Das, S., Forer, L., Schonherr, S., Sidore, C., Locke, A.E., Kwong, A., Vrieze, S.I., Chew, E.Y., Levy, S., McGue, M., et al. (2016). Next-generation genotype imputation service and methods. *Nat Genet* 48, 1284-1287.
3. Gragert, L., Madbouly, A., Freeman, J., and Maiers, M. (2013). Six-locus high resolution HLA haplotype frequencies derived from mixed-resolution DNA typing for the entire US donor registry. *Hum Immunol* 74, 1313-1320.
4. Devlin, B., Roeder, K., and Wasserman, L. (2001). Genomic control, a new approach to genetic-based association studies. *Theor Popul Biol* 60, 155-166.
5. Marsh, S.G., Albert, E.D., Bodmer, W.F., Bontrop, R.E., Dupont, B., Erlich, H.A., Fernandez-Vina, M., Geraghty, D.E., Holdsworth, R., Hurley, C.K., et al. (2010). An update to HLA nomenclature, 2010. *Bone Marrow Transplant* 45, 846-848.
6. Liu, J.Z., van Sommeren, S., Huang, H., Ng, S.C., Alberts, R., Takahashi, A., Ripke, S., Lee, J.C., Jostins, L., Shah, T., et al. (2015). Association analyses identify 38 susceptibility loci for inflammatory bowel disease and highlight shared genetic risk across populations. *Nat Genet* 47, 979-986.
7. Degenhardt, F., Wendorff, M., Wittig, M., Ellinghaus, E., Datta, L.W., Schembri, J., Ng, S.C., Rosati, E., Hubenthal, M., Ellinghaus, D., et al. (2019). Construction and benchmarking of a multi-ethnic reference panel for the imputation of HLA class I and II alleles. *Hum Mol Genet* 28, 2078-2092.
8. Mychaleckyj, J.C., Noble, J.A., Moonsamy, P.V., Carlson, J.A., Varney, M.D., Post, J., Helmberg, W., Pierce, J.J., Bonella, P., Fear, A.L., et al. (2010). HLA genotyping in the international Type 1 Diabetes Genetics Consortium. *Clin Trials* 7, S75-87.
9. Jia, X., Han, B., Onengut-Gumuscu, S., Chen, W.M., Concannon, P.J., Rich, S.S., Raychaudhuri, S., and de Bakker, P.I. (2013). Imputing amino acid polymorphisms in human leukocyte antigens. *PLoS One* 8, e64683.
10. Onengut-Gumuscu, S., Chen, W.M., Burren, O., Cooper, N.J., Quinlan, A.R., Mychaleckyj, J.C., Farber, E., Bonnie, J.K., Szpak, M., Schofield, E., et al. (2015). Fine mapping of type 1 diabetes susceptibility loci and evidence for colocalization of causal variants with lymphoid gene enhancers. *Nat Genet* 47, 381-386.
11. Pillai, N.E., Okada, Y., Saw, W.Y., Ong, R.T., Wang, X., Tantoso, E., Xu, W., Peterson, T.A., Bielawny, T., Ali, M., et al. (2014). Predicting HLA alleles from high-resolution SNP data in three Southeast Asian populations. *Hum Mol Genet* 23, 4443-4451.
12. Okada, Y., Kim, K., Han, B., Pillai, N.E., Ong, R.T., Saw, W.Y., Luo, M., Jiang, L., Yin, J., Bang, S.Y., et al. (2014). Risk for ACPA-positive rheumatoid arthritis is driven by shared HLA amino acid polymorphisms in Asian and European populations. *Hum Mol Genet* 23, 6916-6926.
13. Genomes Project, C., Auton, A., Brooks, L.D., Durbin, R.M., Garrison, E.P., Kang, H.M., Korbel, J.O., Marchini, J.L., McCarthy, S., McVean, G.A., et al. (2015). A global reference for human genetic variation. *Nature* 526, 68-74.
14. Abi-Rached, L., Gouret, P., Yeh, J.H., Di Cristofaro, J., Pontarotti, P., Picard, C., and Paganini, J. (2018). Immune diversity sheds light on missing variation in worldwide genetic diversity panels. *PLoS One* 13, e0206512.
15. Horton, R., Wilming, L., Rand, V., Lovering, R.C., Bruford, E.A., Khodiyar, V.K., Lush, M.J., Povey, S., Talbot, C.C., Jr., Wright, M.W., et al. (2004). Gene map of the extended human MHC. *Nat Rev Genet* 5, 889-899.
16. So, H.C., Gui, A.H., Cherny, S.S., and Sham, P.C. (2011). Evaluating the heritability explained by known susceptibility variants: a survey of ten complex diseases. *Genet Epidemiol* 35, 310-317.



17. Tsoi, L.C., Iyer, M.K., Stuart, P.E., Swindell, W.R., Gudjonsson, J.E., Tejasvi, T., Sarkar, M.K., Li, B., Ding, J., Voorhees, J.J., et al. (2015). Analysis of long non-coding RNAs highlights tissue-specific expression patterns and epigenetic profiles in normal and psoriatic skin. *Genome Biol* 16, 24.
18. Consortium, G.T., Laboratory, D.A., Coordinating Center -Analysis Working, G., Statistical Methods groups-Analysis Working, G., Enhancing, G.g., Fund, N.I.H.C., Nih/Nci, Nih/Nhgri, Nih/Nimh, Nih/Nida, et al. (2017). Genetic effects on gene expression across human tissues. *Nature* 550, 204-213.
19. Vosa, U., Claringbould, A., Westra, H.-J., Bonder, M.J., Deelen, P., Zeng, B., Kirsten, H., others], Visscher, P.M., Scholz, M., et al. (2018). Unraveling the polygenic architecture of complex traits using blood eQTL meta-analysis. *bioRxiv*, 1-57.
20. Kerimov, N., Hayhurst, J.D., Manning, J.R., Walter, P., Kolber, L., Peikova, K., Samovica, M., Burdett, T., Jupp, S., Parkinson, H., et al. (2020). eQTL Catalogue: a compendium of uniformly processed human gene expression and splicing eQTLs. *bioRxiv* <https://doi.org/10.1101/2020.01.29.924266>.
21. Alasoo, K., Rodrigues, J., Mukhopadhyay, S., Knights, A.J., Mann, A.L., Kundu, K., Consortium, H., Hale, C., Dougan, G., and Gaffney, D.J. (2018). Shared genetic effects on chromatin and gene expression indicate a role for enhancer priming in immune response. *Nat Genet* 50, 424-431.
22. Chen, L., Ge, B., Casale, F.P., Vasquez, L., Kwan, T., Garrido-Martin, D., Watt, S., Yan, Y., Kundu, K., Ecker, S., et al. (2016). Genetic Drivers of Epigenetic and Transcriptional Variation in Human Immune Cells. *Cell* 167, 1398-1414 e1324.
23. Momozawa, Y., Dmitrieva, J., Theatre, E., Deffontaine, V., Rahmouni, S., Charlotiaux, B., Crins, F., Docampo, E., Elansary, M., Gori, A.S., et al. (2018). IBD risk loci are enriched in multigenic regulatory modules encompassing putative causative genes. *Nat Commun* 9, 2427.
24. Gutierrez-Arcelus, M., Lappalainen, T., Montgomery, S.B., Buil, A., Ongen, H., Yurovsky, A., Bryois, J., Giger, T., Romano, L., Planchon, A., et al. (2013). Passive and active DNA methylation and the interplay with genetic variation in gene regulation. *Elife* 2, e00523.
25. Fairfax, B.P., Makino, S., Radhakrishnan, J., Plant, K., Leslie, S., Dilthey, A., Ellis, P., Langford, C., Vannberg, F.O., and Knight, J.C. (2012). Genetics of gene expression in primary immune cells identifies cell type-specific master regulators and roles of HLA alleles. *Nat Genet* 44, 502-510.
26. Fairfax, B.P., Humburg, P., Makino, S., Naranbhai, V., Wong, D., Lau, E., Jostins, L., Plant, K., Andrews, R., McGee, C., et al. (2014). Innate immune activity conditions the effect of regulatory variants upon monocyte gene expression. *Science* 343, 1246949.
27. Lappalainen, T., Sammeth, M., Friedlander, M.R., t Hoen, P.A., Monlong, J., Rivas, M.A., Gonzalez-Porta, M., Kurbatova, N., Griebel, T., Ferreira, P.G., et al. (2013). Transcriptome and genome sequencing uncovers functional variation in humans. *Nature* 501, 506-511.
28. Kasela, S., Kisand, K., Tserel, L., Kaleviste, E., Remm, A., Fischer, K., Esko, T., Westra, H.J., Fairfax, B.P., Makino, S., et al. (2017). Pathogenic implications for autoimmune mechanisms derived by comparative eQTL analysis of CD4+ versus CD8+ T cells. *PLoS Genet* 13, e1006643.
29. Lepik, K., Annilo, T., Kukuskina, V., e, Q.C., Kisand, K., Kutalik, Z., Peterson, P., and Peterson, H. (2017). C-reactive protein upregulates the whole blood expression of CD59 - an integrative analysis. *PLoS Comput Biol* 13, e1005766.
30. Naranbhai, V., Fairfax, B.P., Makino, S., Humburg, P., Wong, D., Ng, E., Hill, A.V., and Knight, J.C. (2015). Genomic modulators of gene expression in human neutrophils. *Nat Commun* 6, 7545.
31. Nedelec, Y., Sanz, J., Baharian, G., Szpiech, Z.A., Pacis, A., Dumaine, A., Grenier, J.C., Freiman, A., Sams, A.J., Hebert, S., et al. (2016). Genetic Ancestry and Natural Selection Drive Population Differences in Immune Responses to Pathogens. *Cell* 167, 657-669 e621.
32. Quach, H., Rotival, M., Pothlichet, J., Loh, Y.E., Dannemann, M., Zidane, N., Laval, G., Patin, E., Harmant, C., Lopez, M., et al. (2016). Genetic Adaptation and Neandertal Admixture Shaped the Immune System of Human Populations. *Cell* 167, 643-656 e617.

33. Buil, A., Brown, A.A., Lappalainen, T., Vinuela, A., Davies, M.N., Zheng, H.F., Richards, J.B., Glass, D., Small, K.S., Durbin, R., et al. (2015). Gene-gene and gene-environment interactions detected by transcriptome sequence analysis in twins. *Nat Genet* 47, 88-91.
34. Karolchik, D., Hinrichs, A.S., Furey, T.S., Roskin, K.M., Sugnet, C.W., Haussler, D., and Kent, W.J. (2004). The UCSC Table Browser data retrieval tool. *Nucleic Acids Res* 32, D493-496.
35. Lindblad-Toh, K., Garber, M., Zuk, O., Lin, M.F., Parker, B.J., Washietl, S., Kheradpour, P., Ernst, J., Jordan, G., Mauceli, E., et al. (2011). A high-resolution map of human evolutionary constraint using 29 mammals. *Nature* 478, 476-482.
36. Ward, L.D., and Kellis, M. (2012). HaploReg: a resource for exploring chromatin states, conservation, and regulatory motif alterations within sets of genetically linked variants. *Nucleic Acids Res* 40, D930-934.
37. Boyle, A.P., Hong, E.L., Hariharan, M., Cheng, Y., Schaub, M.A., Kasowski, M., Karczewski, K.J., Park, J., Hitz, B.C., Weng, S., et al. (2012). Annotation of functional variation in personal genomes using RegulomeDB. *Genome Res* 22, 1790-1797.
38. Rentzsch, P., Witten, D., Cooper, G.M., Shendure, J., and Kircher, M. (2019). CADD: predicting the deleteriousness of variants throughout the human genome. *Nucleic Acids Res* 47, D886-D894.
39. Brandt, D.Y., Aguiar, V.R., Bitarello, B.D., Nunes, K., Goudet, J., and Meyer, D. (2015). Mapping Bias Overestimates Reference Allele Frequencies at the HLA Genes in the 1000 Genomes Project Phase I Data. *G3 (Bethesda)* 5, 931-941.
40. Sobota, R.S., Shriner, D., Kodaman, N., Goodloe, R., Zheng, W., Gao, Y.T., Edwards, T.L., Amos, C.I., and Williams, S.M. (2015). Addressing population-specific multiple testing burdens in genetic association studies. *Ann Hum Genet* 79, 136-147.
41. Griffiths, C.E.M., van der Walt, J.M., Ashcroft, D.M., Flohr, C., Naldi, L., Nijsten, T., and Augustin, M. (2017). The global state of psoriasis disease epidemiology: a workshop report. *Br J Dermatol* 177, e4-e7.
42. Okada, Y., Han, B., Tsoi, L.C., Stuart, P.E., Ellinghaus, E., Tejasvi, T., Chandran, V., Pellett, F., Pollock, R., Bowcock, A.M., et al. (2014). Fine mapping major histocompatibility complex associations in psoriasis and its clinical subtypes. *Am J Hum Genet* 95, 162-172.
43. Hinrichs, A.S., Raney, B.J., Speir, M.L., Rhead, B., Casper, J., Karolchik, D., Kuhn, R.M., Rosenbloom, K.R., Zweig, A.S., Haussler, D., et al. (2016). UCSC Data Integrator and Variant Annotation Integrator. *Bioinformatics* 32, 1430-1432.
44. Frankish, A., Diekhans, M., Ferreira, A.M., Johnson, R., Jungreis, I., Loveland, J., Mudge, J.M., Sisu, C., Wright, J., Armstrong, J., et al. (2019). GENCODE reference annotation for the human and mouse genomes. *Nucleic Acids Res* 47, D766-D773.
45. Roadmap Epigenomics, C., Kundaje, A., Meuleman, W., Ernst, J., Bilenky, M., Yen, A., Heravi-Moussavi, A., Kheradpour, P., Zhang, Z., Wang, J., et al. (2015). Integrative analysis of 111 reference human epigenomes. *Nature* 518, 317-330.
